# Supplementary material for: Microwave assisted batch and continuous flow Suzuki–Miyaura reactions in GVL using a Pd/PiNe biowaste-derived heterogeneous catalyst
Source: Royal Society of Chemistry journal article supplement (doi:10.1039/d4gc00497c), 2024-01-01

## ELECTRONIC SUPPLEMENTARY INFORMATION

### **Microwave assisted batch and continuous flow Suzuki-Miyaura reaction in GVL using Pd/PiNe biowaste-derived heterogeneous catalyst**

*Federica Valentini,<sup>a</sup> Benedetta Di Erasmo,<sup>a</sup> Marta Ciani,<sup>a</sup> Shaomin Chen,<sup>a,b</sup> Yanlong Gu<sup>b</sup> and Luigi Vaccaro<sup>\*a</sup>*

*<sup>a</sup>. Laboratory of Green S.O.C. – Dipartimento di Chimica, biologia e Biotecnologie, Università degli Studi di Perugia, Via Elce di Sotto 8, 06123 – Perugia – Italy;  
E-mail: [luigi.vaccaro@unipg.it](mailto:luigi.vaccaro@unipg.it); Web: [www.dcbb.unipg.it/greensoc](http://www.dcbb.unipg.it/greensoc).*

*<sup>b</sup>. Key Laboratory of Material Chemistry for Energy Conversion and Storage, Ministry of Education, Hubei Key Laboratory of Material Chemistry and Service Failure, School of Chemistry and Chemical Engineering, Huazhong University of Science and Technology, Wuhan 430074, China.*

#### **Table of contents**

|                                                                   |        |
|-------------------------------------------------------------------|--------|
| 1. General remarks                                                | ESI-2  |
| 2. General procedures                                             | ESI-3  |
| 3. E-factor calculation                                           | ESI-5  |
| 3.1 E-factor comparison                                           | ESI-8  |
| 4. Characterization data                                          | ESI-14 |
| 5. <sup>1</sup> H <sup>13</sup> C and <sup>19</sup> F NMR spectra | ESI-31 |

## 1. General Remarks

Unless otherwise stated, all chemicals were purchased and used without any further purification. Reactions were performed in a CEM Discover SP microwave oven equipped with 10 mL tubes for batch protocols and used in open vessel configuration for the continuous-flow process. GLC analyses were performed by using Hewlett-Packard HP 5890 SERIES II equipped with a capillary column DB-5MS (30 m, 0.32 mm), a FID detector, and helium as gas carrier. GC-EIMS analyses were carried out by using a Hewlett-Packard HP 6890N Network GC system/5975 mass selective detector equipped with an electron impact ionizer at 70 eV. Melting points were measured on a Büchi 510 apparatus. NMR spectra were recorded on a Bruker DRX-ADVANCE 400 MHz ( $^1\text{H}$  at 400 MHz,  $^{13}\text{C}$  at 100.6 MHz and  $^{19}\text{F}$  at 376.4 MHz) in  $\text{CDCl}_3$  and  $\text{DMSO-d}_6$ . Chemical shifts are reported in ppm ( $\delta$ ), coupling constant (J) in hertz and multiplicity are reported as follows: *s* = singlet, *bs* = broad singlet, *d* = doublet, *dd* = double doublet, *td* = double triplet, *t* = triplet, *m* = multiplet. Products purification was performed using 230-400 mesh silica gel. Elemental Analysis (EA) were conducted on Elementar UNICUBE® elemental analyser. Metal loading was measured using MP-AES 4210 instrument.

$\text{Pd/PiNe}^1$  and 4-(4-bromophenyl)-4-oxobutanoic acid<sup>2</sup> (**11**) were synthesized as reported in the literature.

Characterization data, copies of  $^1\text{H}$  and  $^{13}\text{C}$  NMR spectra are reported below.

## 2. General procedures

### Typical procedure for Suzuki reaction in batch (extraction work up).

In a 10 mL microwave vial equipped with a magnetic stirrer, aryl halide **1** (0.5 mmol), aryl boronic acid **2** (1.1 eq), KO<sub>2</sub>Piv (1.2 eq), **Pd/PiNe** (8 wt%, 0.5 mol%), and GVL:H<sub>2</sub>O (9:1, 0.5 mL) were consecutively added. The reaction was performed in MW cyclic mode ( $T_{\min}$ : 90 °C,  $T_{\max}$ : 120 °C,  $\mu\lambda$ : 50 W, 40 cycles). After removing the catalyst by filtration and washing with 0.5 mL of GVL, the water was evaporated and the remaining GVL was recovered (94%) by distillation. The product was recovered by extraction with heptane (1 mL) washed with 1 M Na<sub>2</sub>CO<sub>3</sub> (2 mL) solution.

### Typical procedure for Suzuki reaction in batch (precipitation work up).

In a 10 mL microwave vial equipped with a magnetic stirrer, aryl halide **1** (0.5 mmol), aryl boronic acid **2** (1.1 eq), KO<sub>2</sub>Piv (1.2 eq), **Pd/PiNe** (8 wt%, 0.5 mol%), and GVL:H<sub>2</sub>O (9:1, 0.5 mL) were consecutively added. The reaction was performed in MW cyclic mode ( $T_{\min}$ : 90 °C,  $T_{\max}$ : 120 °C,  $\mu\lambda$ : 50 W, 40 cycles). After removing the catalyst by filtration, the water was evaporated and the remaining GVL was recovered (94%) by distillation. The product was precipitated with 1 mL of water at 0 °C and recovered by filtration.

### Pd/PiNe recycle.

After the reaction completion the catalyst was recovered by centrifugation, washed with EtOH and water and dried at 80 °C for 1 h. The dried catalyst was reused under the optimized conditions.

### General procedure for leaching determination

The crude reaction mixture, after separation from the catalyst was dried under vacuum, dissolved in 2 mL of aqua regia, and stirred for 1 h at room temperature. The mixture was transferred in a 10 mL graduated flask and Milli-Q water was added to reach the final volume. If present, residual solid was filtered off and the sample was analysed by MP-AES 4210 instrument.

### General procedure for Suzuki reaction under continuous flow conditions.

A PTFE tube (50 cm length, 2 mm width) was packed with 100 mg of **Pd/PiNe** (8 wt%) dispersed in 2 g of quartz powder. The coil reactor was endfitted with a back pressure regulator (45 psi) and placed in a 35 mL vessel collocated in the MW oven. The mixture of aryl halide, boronic acid (1.1 eq) and KO<sub>2</sub>Piv (1.2 eq) in GVL:H<sub>2</sub>O (9:1) was pumped through the reactor using a SHIMADZU LC-40D HPLC pump at a flow rate of 0.1 mL/min (measured at the coil outlet). The microwave irradiation was set at fixed power (50 W) allowing a temperature range between 100 and 120 °C at the steady state. The mixture collected was evaporated to remove water and then the GVL was recovered by distillation under vacuum (96 %). The solid residue was washed with water affording the pure product.

## References:

1. a) F. Valentini, F. Ferlin, S. Lilli, A. Marrocchi, L. Ping, Y. Gu and L. Vaccaro, *Green Chem.*, 2021, **23**, 5887–5895; b) F. Ferlin, F. Valentini, D. Sciosci, M. Calamante, E. Petricci, and L. Vaccaro, *ACS Sustainable Chem. Eng.* 2021, **9**, 12196–12204
2. G. Xiao, G. Xiao, C. Xie, Q. Guo, G. Zi, G. Hou, and Y. Huang, *Org. Lett.* 2022, **24**, 2722–2727

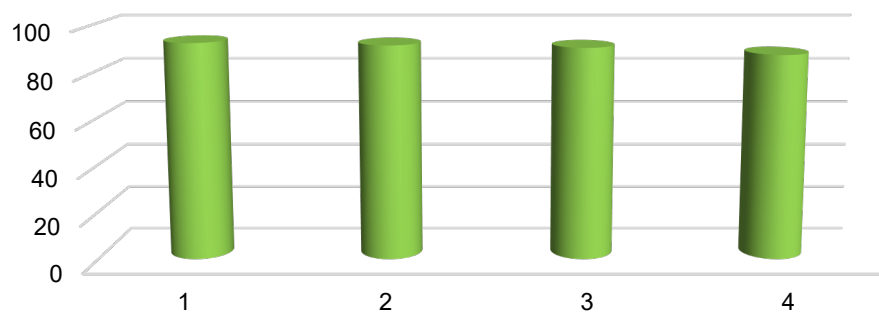

**Figure ESI-1.** Pd/PiNe recycle and Pd leaching under batch conditions and MW-irradiations at not full conversion. Reaction conditions: **1a** (0.5 mmol), **2a** (1.1 eq), Pd/PiNe (0.5 mol%), KO<sub>2</sub>Piv (1.2 eq), 0.5 mL GVL:H<sub>2</sub>O (9:1), 90-120°C, MW fixed power ( $t_{\text{MW}} = 2$  min;  $t_{\text{cool}} = 1$  min), 30 cycles.

### 3. E-factor calculation

| SM coupling partner                               | Without H <sub>2</sub> O recovery                                                                                                                                                                                                                                      | with H <sub>2</sub> O recovery                                                                                                                                                                                                                                                                            |
|---------------------------------------------------|------------------------------------------------------------------------------------------------------------------------------------------------------------------------------------------------------------------------------------------------------------------------|-----------------------------------------------------------------------------------------------------------------------------------------------------------------------------------------------------------------------------------------------------------------------------------------------------------|
| SM coupling batch between <b>1a</b> and <b>2a</b> | E-factor = ((93.4 mg ( <b>1a</b> ) + 68.5 mg ( <b>2a</b> ) + 88.5 mg (KOPiv) + 472.5 mg (GVL) + 50 mg (H <sub>2</sub> O) + 525 mg (GVL washing) + 1000 mg (H <sub>2</sub> O) – 937.7 mg (GVL recovered) – 87 mg ( <b>3a</b> )) / 87 mg ( <b>3a</b> )) = <b>14.6</b>    | E-factor = ((93.4 mg ( <b>1a</b> ) + 68.5 mg ( <b>2a</b> ) + 88.5 mg (KOPiv) + 472.5 mg (GVL) + 50 mg (H <sub>2</sub> O) + 525 mg (GVL washing) + 1000 mg (H <sub>2</sub> O) – 937.7 mg (GVL recovered) – 900 mg (H <sub>2</sub> O recovered) – 87 mg ( <b>3a</b> )) / 87 mg ( <b>3a</b> )) = <b>4.3</b>  |
| SM coupling flow between <b>1a</b> and <b>2a</b>  |                                                                                                                                                                                                                                                                        | E-factor = ((186 mg ( <b>1a</b> ) + 136 mg ( <b>2a</b> ) + 170 mg (KOPiv) + 1890 mg (GVL) + 200 mg (H <sub>2</sub> O) + 1000 mg (H <sub>2</sub> O) – 1815 mg (GVL recovered) – 900 mg (H <sub>2</sub> O recovered) – 176 mg ( <b>3a</b> )) / 176 mg ( <b>3a</b> )) = <b>3.9</b>                           |
| SM coupling batch between <b>1b</b> and <b>2a</b> | E-factor = ((102 mg ( <b>1b</b> ) + 68.5 mg ( <b>2a</b> ) + 88.5 mg (KOPiv) + 472.5 mg (GVL) + 50 mg (H <sub>2</sub> O) + 525 mg (GVL washing) + 1000 mg (H <sub>2</sub> O) – 937.7 mg (GVL recovered) – 97 mg ( <b>3b</b> )) / 97 mg ( <b>3b</b> )) = <b>13.1</b>     | E-factor ((102 mg ( <b>1b</b> ) + 68.5 mg ( <b>2a</b> ) + 88.5 mg (KOPiv) + 472.5 mg (GVL) + 50 mg (H <sub>2</sub> O) + 525 mg (GVL washing) + 1000 mg (H <sub>2</sub> O) – 937.7 mg (GVL recovered) – 900 mg (H <sub>2</sub> O recovered) – 97 mg ( <b>3b</b> )) / 97 mg ( <b>3b</b> )) = <b>3.8</b>     |
| SM coupling batch between <b>1c</b> and <b>2a</b> | E-factor = ((101 mg ( <b>1b</b> ) + 68.5 mg ( <b>2a</b> ) + 88.5 mg (KOPiv) + 472.5 mg (GVL) + 50 mg (H <sub>2</sub> O) + 525 mg (GVL washing) + 1000 mg (H <sub>2</sub> O) – 937.7 mg (GVL recovered) – 88 mg ( <b>3c</b> )) / 88 mg ( <b>3c</b> )) = <b>14.5</b>     | E-factor ((101 mg ( <b>1c</b> ) + 68.5 mg ( <b>2a</b> ) + 88.5 mg (KOPiv) + 472.5 mg (GVL) + 50 mg (H <sub>2</sub> O) + 525 mg (GVL washing) + 1000 mg (H <sub>2</sub> O) – 937.7 mg (GVL recovered) – 900 mg (H <sub>2</sub> O recovered) – 88 mg ( <b>3c</b> )) / 88 mg ( <b>3c</b> )) = <b>4.3</b>     |
| SM coupling batch between <b>1d</b> and <b>2a</b> | E-factor = ((115.7 mg ( <b>1d</b> ) + 68.5 mg ( <b>2a</b> ) + 88.5 mg (KOPiv) + 472.5 mg (GVL) + 50 mg (H <sub>2</sub> O) + 525 mg (GVL washing) + 1000 mg (H <sub>2</sub> O) – 937.7 mg (GVL recovered) – 113 mg ( <b>3d</b> )) / 113 mg ( <b>3d</b> )) = <b>11.2</b> | E-factor ((115.7 mg ( <b>1d</b> ) + 68.5 mg ( <b>2a</b> ) + 88.5 mg (KOPiv) + 472.5 mg (GVL) + 50 mg (H <sub>2</sub> O) + 525 mg (GVL washing) + 1000 mg (H <sub>2</sub> O) – 937.7 mg (GVL recovered) – 900 mg (H <sub>2</sub> O recovered) – 113 mg ( <b>3d</b> )) / 113 mg ( <b>3d</b> )) = <b>3.2</b> |
| SM coupling batch between <b>1e</b> and <b>2a</b> | E-factor = ((97.6 mg ( <b>1e</b> ) + 68.5 mg ( <b>2a</b> ) + 88.5 mg (KOPiv) + 472.5 mg (GVL) + 50 mg (H <sub>2</sub> O) + 525 mg (GVL washing) + 1000 mg (H <sub>2</sub> O) – 937.7 mg (GVL recovered) – 90 mg ( <b>3e</b> )) / 90 mg ( <b>3e</b> )) = <b>14.2</b>    | E-factor ((97.6 mg ( <b>1e</b> ) + 68.5 mg ( <b>2a</b> ) + 88.5 mg (KOPiv) + 472.5 mg (GVL) + 50 mg (H <sub>2</sub> O) + 525 mg (GVL washing) + 1000 mg (H <sub>2</sub> O) – 937.7 mg (GVL recovered) – 900 mg (H <sub>2</sub> O recovered) – 90 mg ( <b>3e</b> )) / 90 mg ( <b>3e</b> )) = <b>4.2</b>    |

|                                                   |                                                                                                                                                                                                                                                                                                                                   |                                                                                                                                                                                                                                                                                                                                                                       |
|---------------------------------------------------|-----------------------------------------------------------------------------------------------------------------------------------------------------------------------------------------------------------------------------------------------------------------------------------------------------------------------------------|-----------------------------------------------------------------------------------------------------------------------------------------------------------------------------------------------------------------------------------------------------------------------------------------------------------------------------------------------------------------------|
| SM coupling batch between <b>1f</b> and <b>2a</b> | E-factor = ((107 mg ( <b>1e</b> ) + 68.5 mg ( <b>2a</b> ) + 88.5 mg (KOPiv) + 472.5 mg (GVL) + 50 mg (H <sub>2</sub> O) + 525 mg (GVL washing) + 1000 mg (H <sub>2</sub> O) – 937.7 mg (GVL recovered) – 82 mg ( <b>3e</b> )) / 82 mg ( <b>3e</b> ) = <b>15.8</b>                                                                 | E-factor ((107 mg ( <b>1f</b> ) + 68.5 mg ( <b>2a</b> ) + 88.5 mg (KOPiv) + 472.5 mg (GVL) + 50 mg (H <sub>2</sub> O) + 525 mg (GVL washing) + 1000 mg (H <sub>2</sub> O) – 937.7 mg (GVL recovered) – 900 mg (H <sub>2</sub> O recovered) – 82 mg ( <b>3f</b> )) / 82 mg ( <b>3f</b> ) = <b>4.8</b>                                                                  |
| SM coupling batch between <b>1g</b> and <b>2a</b> | E-factor = ((110 mg ( <b>1g</b> ) + 68.5 mg ( <b>2a</b> ) + 88.5 mg (KOPiv) + 945 mg (GVL) + 100 mg (H <sub>2</sub> O) + 525 mg (GVL washing) + 1000 mg (H <sub>2</sub> O) – 1382 mg (GVL recovered) – 66 mg ( <b>3g</b> )) / 66 mg ( <b>3g</b> ) = <b>21.0</b>                                                                   | E-factor = ((110 mg ( <b>1g</b> ) + 68.5 mg ( <b>2a</b> ) + 88.5 mg (KOPiv) + 945 mg (GVL) + 100 mg (H <sub>2</sub> O) + 525 mg (GVL washing) + 1000 mg (H <sub>2</sub> O) – 1382 mg (GVL recovered) – 900 mg (H <sub>2</sub> O recovered) – 66 mg ( <b>3e</b> )) / 66 mg ( <b>3e</b> ) = <b>7.4</b>                                                                  |
| SM coupling batch between <b>1h</b> and <b>2a</b> | E-factor = ((119 mg ( <b>1h</b> ) + 68.5 mg ( <b>2a</b> ) + 88.5 mg (KOPiv) + 472.5 mg (GVL) + 50 mg (H <sub>2</sub> O) + 525 mg (GVL washing) + 1000 mg (H <sub>2</sub> O) – 937.7 mg (GVL recovered) – 68 mg ( <b>3h</b> )) / 68 mg ( <b>3h</b> ) = <b>19.4</b>                                                                 | E-factor ((119 mg ( <b>1h</b> ) + 68.5 mg ( <b>2a</b> ) + 88.5 mg (KOPiv) + 472.5 mg (GVL) + 50 mg (H <sub>2</sub> O) + 525 mg (GVL washing) + 1000 mg (H <sub>2</sub> O) – 937.7 mg (GVL recovered) – 900 mg (H <sub>2</sub> O recovered) – 68 mg ( <b>3h</b> )) / 68 mg ( <b>3h</b> ) = <b>6.1</b>                                                                  |
| SM coupling batch between <b>1i</b> and <b>2a</b> | E-factor = ((104 mg ( <b>1i</b> ) + 68.5 mg ( <b>2a</b> ) + 88.5 mg (KOPiv) + 472.5 mg (GVL) + 50 mg (H <sub>2</sub> O) + 525 mg (GVL washing) + 1000 mg (H <sub>2</sub> O) – 937.7 mg (GVL recovered) – 66 mg ( <b>3i</b> )) / 66 mg ( <b>3i</b> ) = <b>19.8</b>                                                                 | E-factor ((104 mg ( <b>1i</b> ) + 68.5 mg ( <b>2a</b> ) + 88.5 mg (KOPiv) + 472.5 mg (GVL) + 50 mg (H <sub>2</sub> O) + 525 mg (GVL washing) + 1000 mg (H <sub>2</sub> O) – 937.7 mg (GVL recovered) – 900 mg (H <sub>2</sub> O recovered) – 82 mg ( <b>3i</b> )) / 82 mg ( <b>3i</b> ) = <b>6.1</b>                                                                  |
| SM coupling batch between <b>1j</b> and <b>2a</b> | E-factor = ((80.6 mg ( <b>1j</b> ) + 68.5 mg ( <b>2a</b> ) + 88.5 mg (KOPiv) + 472.5 mg (GVL) + 50 mg (H <sub>2</sub> O) + 525 mg (GVL washing) + 2000 mg (Na <sub>2</sub> CO <sub>3</sub> aq) + 684 mg (heptane) – 937.7 mg (GVL recovered) – 616 (heptane recovered) – 69 mg ( <b>3j</b> )) / 69 mg ( <b>3j</b> ) = <b>34.0</b> | E-factor ((80.6 mg ( <b>1j</b> ) + 68.5 mg ( <b>2a</b> ) + 88.5 mg (KOPiv) + 472.5 mg (GVL) + 50 mg (H <sub>2</sub> O) + 525 mg (GVL washing) + 2000 mg (Na <sub>2</sub> CO <sub>3</sub> aq) + 684 mg (heptane) – 937.7 mg (GVL recovered) – 616 (heptane recovered) – 1800 mg (H <sub>2</sub> O recovered) – 69 mg ( <b>3j</b> )) / 69 mg ( <b>3j</b> ) = <b>7.9</b> |
| SM coupling batch between <b>1k</b> and <b>2a</b> | E-factor = ((102.5 mg ( <b>1k</b> ) + 68.5 mg ( <b>2a</b> ) + 88.5 mg (KOPiv) + 472.5 mg (GVL) + 50 mg (H <sub>2</sub> O) + 525 mg (GVL washing) + 1000 mg (H <sub>2</sub> O) – 937.7 mg (GVL recovered) – 99 mg ( <b>3k</b> )) / 99 mg ( <b>3k</b> ) = <b>12.8</b>                                                               | E-factor ((102.5 mg ( <b>1k</b> ) + 68.5 mg ( <b>2a</b> ) + 88.5 mg (KOPiv) + 472.5 mg (GVL) + 50 mg (H <sub>2</sub> O) + 525 mg (GVL washing) + 1000 mg (H <sub>2</sub> O) – 937.7 mg (GVL recovered) – 900 mg (H <sub>2</sub> O recovered) – 99 mg ( <b>3k</b> )) / 99 mg ( <b>3k</b> ) = <b>3.7</b>                                                                |

|                                                   |                                                                                                                                                                                                                                                                     |                                                                                                                                                                                                                                                                                                        |
|---------------------------------------------------|---------------------------------------------------------------------------------------------------------------------------------------------------------------------------------------------------------------------------------------------------------------------|--------------------------------------------------------------------------------------------------------------------------------------------------------------------------------------------------------------------------------------------------------------------------------------------------------|
| SM coupling batch between <b>1i</b> and <b>2b</b> | E-factor = ((104 mg ( <b>1i</b> ) + 86.8 mg ( <b>2b</b> ) + 88.5 mg (KOPiv) + 472.5 mg (GVL) + 50 mg (H <sub>2</sub> O) + 525 mg (GVL washing) + 1000 mg (H <sub>2</sub> O) – 937.7 mg (GVL recovered) – 75 mg ( <b>3a</b> )) / 75 mg ( <b>3a</b> ) = <b>17.5</b>   | E-factor ((104 mg ( <b>1i</b> ) + 86.8 mg ( <b>2b</b> ) + 88.5 mg (KOPiv) + 472.5 mg (GVL) + 50 mg (H <sub>2</sub> O) + 525 mg (GVL washing) + 1000 mg (H <sub>2</sub> O) – 937.7 mg (GVL recovered) – 900 mg (H <sub>2</sub> O recovered) – 75 mg ( <b>3a</b> )) / 75 mg ( <b>3a</b> ) = <b>5.5</b>   |
| SM coupling batch between <b>1i</b> and <b>2c</b> | E-factor = ((104 mg ( <b>1i</b> ) + 90.5 mg ( <b>2c</b> ) + 88.5 mg (KOPiv) + 472.5 mg (GVL) + 50 mg (H <sub>2</sub> O) + 525 mg (GVL washing) + 1000 mg (H <sub>2</sub> O) – 937.7 mg (GVL recovered) – 51 mg ( <b>3e</b> )) / 51 mg ( <b>3e</b> ) = <b>26.3</b>   | E-factor ((104 mg ( <b>1i</b> ) + 90.5 mg ( <b>2c</b> ) + 88.5 mg (KOPiv) + 472.5 mg (GVL) + 50 mg (H <sub>2</sub> O) + 525 mg (GVL washing) + 1000 mg (H <sub>2</sub> O) – 937.7 mg (GVL recovered) – 900 mg (H <sub>2</sub> O recovered) – 51 mg ( <b>3e</b> )) / 51 mg ( <b>3e</b> ) = <b>8.7</b>   |
| SM coupling batch between <b>1i</b> and <b>2d</b> | E-factor = ((104 mg ( <b>1i</b> ) + 105 mg ( <b>2d</b> ) + 88.5 mg (KOPiv) + 945 mg (GVL) + 100 mg (H <sub>2</sub> O) + 525 mg (GVL washing) + 1000 mg (H <sub>2</sub> O) – 937.7 mg (GVL recovered) – 99 mg ( <b>3l</b> )) / 99 mg ( <b>3l</b> ) = <b>18.5</b>     | E-factor ((104 mg ( <b>1i</b> ) + 105 mg ( <b>2d</b> ) + 88.5 mg (KOPiv) + 945 mg (GVL) + 100 mg (H <sub>2</sub> O) + 525 mg (GVL washing) + 1000 mg (H <sub>2</sub> O) – 937.7 mg (GVL recovered) – 900 mg (H <sub>2</sub> O recovered) – 99 mg ( <b>3l</b> )) / 99 mg ( <b>3l</b> ) = <b>9.4</b>     |
| SM coupling batch between <b>1a</b> and <b>2e</b> | E-factor = ((93.4 mg ( <b>1a</b> ) + 86 mg ( <b>2e</b> ) + 88.5 mg (KOPiv) + 472.5 mg (GVL) + 50 mg (H <sub>2</sub> O) + 525 mg (GVL washing) + 1000 mg (H <sub>2</sub> O) – 937.7 mg (GVL recovered) – 98 mg ( <b>3m</b> )) / 98 mg ( <b>3m</b> ) = <b>13.1</b>    | E-factor ((93.4 mg ( <b>1a</b> ) + 86 mg ( <b>2e</b> ) + 88.5 mg (KOPiv) + 472.5 mg (GVL) + 50 mg (H <sub>2</sub> O) + 525 mg (GVL washing) + 1000 mg (H <sub>2</sub> O) – 937.7 mg (GVL recovered) – 900 mg (H <sub>2</sub> O recovered) – 98 mg ( <b>3m</b> )) / 98 mg ( <b>3m</b> ) = <b>3.9</b>    |
| SM coupling batch between <b>1a</b> and <b>2f</b> | E-factor = ((93.4 mg ( <b>1a</b> ) + 76.3 mg ( <b>2f</b> ) + 88.5 mg (KOPiv) + 472.5 mg (GVL) + 50 mg (H <sub>2</sub> O) + 525 mg (GVL washing) + 1000 mg (H <sub>2</sub> O) – 937.7 mg (GVL recovered) – 82 mg ( <b>3n</b> )) / 82 mg ( <b>3n</b> ) = <b>15.7</b>  | E-factor ((93.4 mg ( <b>1a</b> ) + 76.3 mg ( <b>2f</b> ) + 88.5 mg (KOPiv) + 472.5 mg (GVL) + 50 mg (H <sub>2</sub> O) + 525 mg (GVL washing) + 1000 mg (H <sub>2</sub> O) – 937.7 mg (GVL recovered) – 900 mg (H <sub>2</sub> O recovered) – 82 mg ( <b>3n</b> )) / 82 mg ( <b>3n</b> ) = <b>4.7</b>  |
| SM coupling batch between <b>1l</b> and <b>2a</b> | E-factor = ((128 mg ( <b>1l</b> ) + 68.5 mg ( <b>2a</b> ) + 88.5 mg (KOPiv) + 472.5 mg (GVL) + 50 mg (H <sub>2</sub> O) + 525 mg (GVL washing) + 1000 mg (H <sub>2</sub> O) – 937.7 mg (GVL recovered) – 126 mg ( <b>3o</b> )) / 126 mg ( <b>3o</b> ) = <b>10.1</b> | E-factor ((128 mg ( <b>1l</b> ) + 68.5 mg ( <b>2a</b> ) + 88.5 mg (KOPiv) + 472.5 mg (GVL) + 50 mg (H <sub>2</sub> O) + 525 mg (GVL washing) + 1000 mg (H <sub>2</sub> O) – 937.7 mg (GVL recovered) – 900 mg (H <sub>2</sub> O recovered) – 126 mg ( <b>3o</b> )) / 126 mg ( <b>3o</b> ) = <b>2.9</b> |

### 3.1 E-factor comparison:

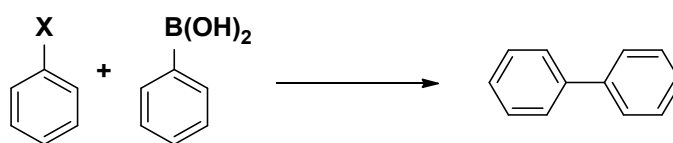

E-factor = 6.1 (*this work - batch*)

| Ref main text | General procedure                                                                                                                                                                                                                                                                                                                                                                                                                                                                                                                                                                                                                                                                                                                                                                                                                                                                                                                                                                                                                                                                                                                                                                                                                                                                                                                                                                                                                                                                                                                                                                                                                                                                                                                                                                                  | E-factor                                                                                                                                                                                                                                                                                                                                                                       |
|---------------|----------------------------------------------------------------------------------------------------------------------------------------------------------------------------------------------------------------------------------------------------------------------------------------------------------------------------------------------------------------------------------------------------------------------------------------------------------------------------------------------------------------------------------------------------------------------------------------------------------------------------------------------------------------------------------------------------------------------------------------------------------------------------------------------------------------------------------------------------------------------------------------------------------------------------------------------------------------------------------------------------------------------------------------------------------------------------------------------------------------------------------------------------------------------------------------------------------------------------------------------------------------------------------------------------------------------------------------------------------------------------------------------------------------------------------------------------------------------------------------------------------------------------------------------------------------------------------------------------------------------------------------------------------------------------------------------------------------------------------------------------------------------------------------------------|--------------------------------------------------------------------------------------------------------------------------------------------------------------------------------------------------------------------------------------------------------------------------------------------------------------------------------------------------------------------------------|
| 16a           | <p><u>Preparation of stock solution of the SM catalyst:</u> To an oven-dried 10 mL Schlenk purged under N<sub>2</sub> atmosphere, palladium pre-catalyst Pd(ACN)<sub>2</sub>Cl<sub>2</sub> (0.04 mmol, 10.4 mg) and ligand sSPhos, (0.12 mmol, 61.6 mg) were dissolved in 4 mL of HEP/water(40%) solution. The mixture was stirred for 5 min at room temperature.</p> <p>To an oven-dried 10 mL Schlenk purged under N<sub>2</sub> atmosphere, 50 <math>\mu</math>L of the stock solution (0.05 mol% of palladium catalyst) was added along with the amount of HEP/water (40%) solution needed to achieve the desired concentration. The other reagents were then added in the following order: base (1.1 mmol, 1.1 equiv), aryl chloride (1.0 mmol, 1.0 equiv) and boronic acid (1.05 mmol, 1.05 equiv). The reaction mixture was heated to the desired temperature with an oil bath and maintained at this temperature under stirring; the conversion was evaluated through HPLC-UV analysis at 210 nm considering the appropriate RRF (see Chapter 9 for RRF calculation). At reaction completion, the mixture was extracted with an appropriate organic solvent (3x1 mL). The collected organic phases were concentrated under reduced pressure. The product was isolated without need of purification.</p> <p>The reaction mixture, containing HEP/water, conjugated base (K<sub>2</sub>CO<sub>3</sub> or Cs<sub>2</sub>CO<sub>3</sub> acid and the catalyst complex, was treated with sodium formate (0.1 mmol, 10.0 mg) for 1h at 60°C in order to generate palladium black. At reaction completion, the mixture was filtered out with the aid of charcoal (60 mg) and the palladium metal was recovered. The filtrate was distilled under reduced pressure to recover HEP in 95% yield</p> | <p>E-factor = (1.1 g (chlorobenzene) + 1.2 g (phenylboronic acid) + 3.57 g (Cs<sub>2</sub>CO<sub>3</sub>) + 0.007 g (sSPhos) + 0.0001 g (Pd(CAN)<sub>2</sub>Cl<sub>2</sub> not recovered) + 0.34 g (HEP not recovered) + 4 g (H<sub>2</sub>O) + 0.01 g (HCOONa) + 0.06 g (charcoal) + 1.16 g (cyclohexane not recovered) – 1.47 (product)) / 1.47 g (product) = <b>6.8</b></p> |
| 16c           | <p>A stirring bar and a cubic sample of Pd@PDA@PUF of ca. 8 cm<sup>3</sup>, whose mass was adjusted in relation to its Pd content established by ICP-AES to reach a Pd loading of 7 <math>\mu</math>mol, were introduced in a tube in a similar fashion to the hydrogenation experiments. Ethanol/water (1 : 1)</p>                                                                                                                                                                                                                                                                                                                                                                                                                                                                                                                                                                                                                                                                                                                                                                                                                                                                                                                                                                                                                                                                                                                                                                                                                                                                                                                                                                                                                                                                                | <p><b>0.5 mmol scale</b></p> <p>E-factor = (3.144 g (EtOH) + 4.000 g (H<sub>2</sub>O) + 0.0785 g (bromobenzene) + 0.0731 g (phenylboronic) + 0.1365 g (K<sub>2</sub>CO<sub>3</sub>) + 2.000 g (H<sub>2</sub>O) +</p>                                                                                                                                                           |



|            |                                                                                                                                                                                                                                                                                                                                                                                                                                                                                                                                                                                                                                                                                                                                                                                                                                                                                                                                                                                                                                |                                                                                                                                                                                                                                                                                                                                                                                                                                                                                                                                                                   |
|------------|--------------------------------------------------------------------------------------------------------------------------------------------------------------------------------------------------------------------------------------------------------------------------------------------------------------------------------------------------------------------------------------------------------------------------------------------------------------------------------------------------------------------------------------------------------------------------------------------------------------------------------------------------------------------------------------------------------------------------------------------------------------------------------------------------------------------------------------------------------------------------------------------------------------------------------------------------------------------------------------------------------------------------------|-------------------------------------------------------------------------------------------------------------------------------------------------------------------------------------------------------------------------------------------------------------------------------------------------------------------------------------------------------------------------------------------------------------------------------------------------------------------------------------------------------------------------------------------------------------------|
|            | <p>(8 mL) was then added to immerse the foam. This was followed by the addition of phenylboronic acid (0.6 or 3.6 mmol), K<sub>2</sub>CO<sub>3</sub> (0.75 or 4.5 mmol), and aryl bromide (0.5 or 3 mmol) (Pd content: 1.4 or 0.23 mol% vs. aryl bromide). The reaction mixture was then heated under stirring (625 rpm) by putting the tube in an oil bath at 65 °C. After 4 h, the reaction medium was poured into water (2 mL) and the product was extracted with ethyl acetate (2 × 10 mL). The combined extracts were then washed with brine (10 mL) and dried over anhydrous MgSO<sub>4</sub>. At this point, an aliquot was removed by syringe to determine the conversion of aryl bromide by GC analysis, and the solvent was removed under reduced pressure. The crude material was then purified by column chromatography over silica with petroleum ether/ethyl acetate (20:1) as eluent to give the desired product, whose identity was confirmed by <sup>1</sup>H and <sup>13</sup>C NMR in CDCl<sub>3</sub>.</p> | <p>18.040 g (EtOAc) + 12.000 g (brine) – 0.07556 g (product)) / 0.07556 g (product) = 521.4</p> <p><b>Column chromatography was not included in the calculation</b></p> <p><b>3 mmol scale:</b></p> <p>E-factor = (3.144 g (EtOH) + 4.000 g (H<sub>2</sub>O) + 0.471 g (bromobenzene) + 0.4389 g (phenylboronic) + 0.6219 g (K<sub>2</sub>CO<sub>3</sub>) + 2.000 g (H<sub>2</sub>O) + 18.040 g (EtOAc) + 12.000 g (brine) – 0.45337 g (product)) / 0.45337 g (product) = <b>88.8</b></p> <p><b>Column chromatography was not included in the calculation</b></p> |
| <b>25d</b> | <p>An exactly weighed quantity of bromoarenes (100 mg), Pd/CNS catalyst (10 mol%), boronic acid (1.5 equivalents), Na<sub>2</sub>CO<sub>3</sub> (3.0 equivalents), and solvent (5 mL) was taken in a reaction vessel. The reaction mixture was heated at 150 °C under microwave irradiation for 40–60 min. After cooling, the reaction mixture was filtered and dried; column chromatography was performed on silica gel (60–120 mesh) or neutral alumina using hexane and ethyl acetate as eluents to isolate the product.</p>                                                                                                                                                                                                                                                                                                                                                                                                                                                                                                | <p>E-factor = (0.100 g (bromobenzene) + 0.1165 g (phenyl boronic acid) + 0.2025 g (Na<sub>2</sub>CO<sub>3</sub>) + 3.960 g (MeOH) – 0.09134 g (93 % product)) / 0.09134 g (93 % product) = <b>46.9</b></p> <p><b>Column chromatography was not included in the calculation</b></p>                                                                                                                                                                                                                                                                                |

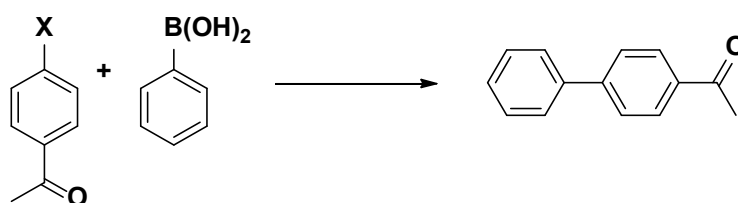

**E-factor = 4.3 (this work - batch)**

|            |                                                                                                                                                                                                                                                                                                                                                                                                                                                                                                                           |                                                                                                                                                                                                                                                                                                    |
|------------|---------------------------------------------------------------------------------------------------------------------------------------------------------------------------------------------------------------------------------------------------------------------------------------------------------------------------------------------------------------------------------------------------------------------------------------------------------------------------------------------------------------------------|----------------------------------------------------------------------------------------------------------------------------------------------------------------------------------------------------------------------------------------------------------------------------------------------------|
| <b>16h</b> | <p>HNT-Pd catalyst (1% or 0.1 mol%), phenylboronic acid (65 mg, 0.547 mmol), K<sub>2</sub>CO<sub>3</sub> (84 mg, 0.615 mmol), aryl bromide (0.55 mmol), ethanol (0.6 ml) and water (0.6 ml) were placed in a micro-wave test tube provided with a cap. The mixture was inserted into microwave apparatus at a temperature of 120 °C and 14 W power, under constant stirring for 10 min; the solvent was then removed under reduced pressure and the residue was checked by <sup>1</sup>H-NMR to calculate conversion.</p> | <p>E-factor = 65 mg (phenylboronic acid) + 84 mg (K<sub>2</sub>CO<sub>3</sub>) + 109.47 mg (4-bromoacetophenone) + 473 mg (EtOH) + 600 mg (H<sub>2</sub>O) - 106.27 (99% product) / 106.27 (99% product) = <b>11.5</b></p> <p><b>Calculated on conversion without work-up and purification</b></p> |
| <b>25a</b> | <p>The microwave reaction vessel was flushed with a mixture containing 1 mmol of 4'-bromoacetophenone (6) (199 mg), 1.2 mmol of phenylboronic acid (5a) (146 mg),</p>                                                                                                                                                                                                                                                                                                                                                     | <p>E-factor = 0.199 g (4'-bromoacetophenone) + 0.146 g (phenylboronic acid) + 0.194</p>                                                                                                                                                                                                            |

|            |                                                                                                                                                                                                                                                                                                                                                                                                                                                                                                                                                                                                                                                                                                                                                                                                                                                                                                                                                                                                                                                                         |                                                                                                                                                                                                                                                                                                                                                                                                                                                    |
|------------|-------------------------------------------------------------------------------------------------------------------------------------------------------------------------------------------------------------------------------------------------------------------------------------------------------------------------------------------------------------------------------------------------------------------------------------------------------------------------------------------------------------------------------------------------------------------------------------------------------------------------------------------------------------------------------------------------------------------------------------------------------------------------------------------------------------------------------------------------------------------------------------------------------------------------------------------------------------------------------------------------------------------------------------------------------------------------|----------------------------------------------------------------------------------------------------------------------------------------------------------------------------------------------------------------------------------------------------------------------------------------------------------------------------------------------------------------------------------------------------------------------------------------------------|
|            | 0.6 mmol of TBAB (194 mg) (in case of using water as a solvent), 1 mmol of the appropriate base, 0.75 mol% of Pd-complex 4a and 10–15 mL of the appropriate solvent. The microwaves irradiation parameters was adjusted in such away that the vessel temperature always kept near the boiling point of the appropriate solvent with low rate stirring (to avoid the pressure irregularities inside the reaction vessel). The reaction monitoring and working up have been done as in the conventional method to give 4-acetyl-1,1'-biphenyl as a white solid (Reaction workup was achieved by extraction the reaction product using ethyl acetate (3 × 20 mL), then drying the axtracts using unhydrous sodium sulphate. The organic layer was evporated under vaccum to give 4-acetyl-1,1'-biphenyl as a white solid).                                                                                                                                                                                                                                                 | g (TBAB) + 0.138 g (K <sub>2</sub> CO <sub>3</sub> ) + 10.00 g (H <sub>2</sub> O) + 54.120 g (EtOAc) – 0.196 g (100% product)) / 0.196 g (100% product) = <b>331.6</b>                                                                                                                                                                                                                                                                             |
| <b>26f</b> | Batch: General Procedure for the Microwave Assisted Suzuki Coupling in Batch (Method A). The aryl halide (0.5 mmol) and boronic acid (0.5 mmol) were dissolved in ethanol (6 mL, 95%) in a microwave vial. Tetra-butylammonium acetate (1 mmol) was added in ethanol (1 mL) followed by Pd EnCat-30™ (63 mg, 5 mol%). The reaction was irradiated in a microwave apparatus at 120 °C for 10 min. After cooling to ambient temperature in the microwave cavity the reaction mixture was purified on an SCXII cartridge using DCM (10 mL) as eluent and evaporated to dryness.                                                                                                                                                                                                                                                                                                                                                                                                                                                                                            | E-factor: (0.0995 g (4'-bromoacetophenone) + 0.0610 g (phenyl boronic acid) + 4.724 g (EtOH) + 0.3015 g (TBAAc) + 0.789 g (EtOH) + 13.3 g (DCM) – 0.0863 g (88 % product)) / 0.0863 g (88 % product) = <b>222</b>                                                                                                                                                                                                                                  |
| <b>26f</b> | Flow: The flow reactor was packed with Pd EnCat-30™ (170 – 190 mg, 0.06 – 0.07 mmol) and sand used as an inert packing material at the outer (non microwaved) regions of the flow reactor. Ethanol was pumped through the cell at a flow rate of 0.1 mL/min for 10 min to purge the system using a Gilson 402 syringe pump. Stock solutions of the aryl halide (0.5 mmol), boronic acid (0.5 mmol) and tetra-butylammonium acetate (1.0 mmol) in ethanol ( <b>0.01</b> , 0.07 or <b>0.2M</b> ) were fed into the reactor at a flow rate of 0.1 mL/min for the required time (pumping controlled by Gilson 402 syringe pumps). During this period the flow reactor was irradiated in a microwave apparatus at 50W with compressed air cooling (4 bar, 22 °C temperature). The 4 product was diverted through a scavenging column containing Amberlyst 15 resin (4 g) before collection and evaporated to dryness. Following the reaction ethanol was pumped into the reactor at a rate of 0.1 mL/min in order to flush the system before passing in the next components. | E-factor = (99.5 mg (4-bromoacetophenone) + 60.9 mg (phenylboronic acid) + 301.5 mg (TBAAc) + 1970 mg (EtOH <b>0.2 M</b> ) – 88.3 (90% product)) / 88.3 (90% product) = <b>26.5</b><br><br>E-factor = (99.5 mg (4-bromoacetophenone) + 60.9 mg (phenylboronic acid) + 301.5 mg (TBAAc) + 39450 mg (EtOH <b>0.01 M</b> ) – 88.3 (90% product)) / 88.3 (90% product) = <b>451.0</b><br><br><b>Calculated without considering Amberlyst 15 resin.</b> |

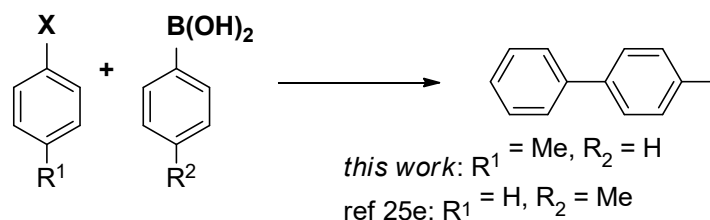

**E-factor = 7.4 (*this work - batch*)**

|            |                                                                                                                                                                                                                                                                                                                                                                                                                                                                                                                                                                                                                                                                                                                                                                                                                                                      |                                                                                                                                                                                                                                                                                                                                                     |
|------------|------------------------------------------------------------------------------------------------------------------------------------------------------------------------------------------------------------------------------------------------------------------------------------------------------------------------------------------------------------------------------------------------------------------------------------------------------------------------------------------------------------------------------------------------------------------------------------------------------------------------------------------------------------------------------------------------------------------------------------------------------------------------------------------------------------------------------------------------------|-----------------------------------------------------------------------------------------------------------------------------------------------------------------------------------------------------------------------------------------------------------------------------------------------------------------------------------------------------|
| <b>25e</b> | <p>The synthesis of 4-methylbiphenyl is representative of the general reaction protocol: PEG 400 (2 g), palladium chloride (0.050 g, 0.282 mmol), <i>p</i>-methylphenylboronic acid (0.150 g, 1.10 mmol) and bromobenzene (0.156 g, 1 mmol) were placed in a 25 ml round bottomed flask and mixed well on a Fisher Scientific touch mixer (Model 231). Potassium fluoride (0.390 g) was added to the reaction mixture, mixed well and the contents were then heated in an unmodified household microwave oven (Panasonic NN-S740WA, 1200 W) at 240 W for 50 s. The reaction mixture turned from red to brown-black and the bulk temperature was found to be between 100 and 105 °C. After cooling, the product was extracted into diethyl ether (2 mL 33) by vortexing and was purified by flash chromatography to afford 4-methylbiphenyl (84%)</p> | <p>E-factor = (0.150 g (<i>p</i>-methylphenylboronic acid) + 0.156 g (bromobenzene) + 0.390 g (KF) + 4.338 g (Et<sub>2</sub>O) – 0.1413 (84% product)) / 0.1413 (84% product) = <b>34.6</b></p> <p>PEG 400 and Pd catalyst were recovered and thus excluded from calculation.</p> <p>Column chromatography was not included in the calculation.</p> |
|------------|------------------------------------------------------------------------------------------------------------------------------------------------------------------------------------------------------------------------------------------------------------------------------------------------------------------------------------------------------------------------------------------------------------------------------------------------------------------------------------------------------------------------------------------------------------------------------------------------------------------------------------------------------------------------------------------------------------------------------------------------------------------------------------------------------------------------------------------------------|-----------------------------------------------------------------------------------------------------------------------------------------------------------------------------------------------------------------------------------------------------------------------------------------------------------------------------------------------------|

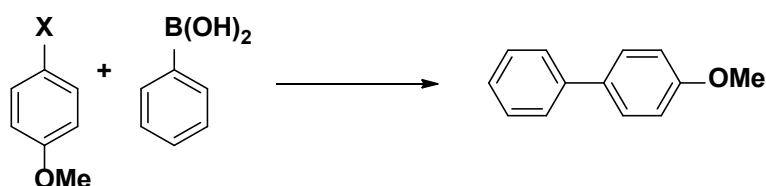

**E-factor = 6.1 (*this work - batch*)**

|            |                                                                                                                                                                                                                                                                                                                                                                                                                                                                                                                                                                                                                                                                                         |                                                                                                                                                                                                                                                                       |
|------------|-----------------------------------------------------------------------------------------------------------------------------------------------------------------------------------------------------------------------------------------------------------------------------------------------------------------------------------------------------------------------------------------------------------------------------------------------------------------------------------------------------------------------------------------------------------------------------------------------------------------------------------------------------------------------------------------|-----------------------------------------------------------------------------------------------------------------------------------------------------------------------------------------------------------------------------------------------------------------------|
| <b>16e</b> | <p>DaPdNPs were added to a 15 mL Hungate tube containing aryl halide (25 mM), phenyl boronic acid (30 mM), K<sub>2</sub>CO<sub>3</sub> (30 mM) and TPGS1000/TPGS-750-M (2% w/v) in H<sub>2</sub>O (5 mL). The tubes were sealed with butyl rubber septa and screw-caps and incubated at 37 °C (200 rpm) for 20 h in a New Brunswick Innova 44 incubator shaker (Eppendorf). After this time, the reactions were cooled to room temperature, extracted with methyl <i>tert</i>-butyl ether (MTBE, 3 x 1.7 mL) and concentrated under reduced pressure. The crude residue was dissolved in 1 mL CDCl<sub>3</sub> containing 10 mM TMB and analysed by <sup>1</sup>H NMR spectroscopy.</p> | <p>E-factor = 23.4 mg (4-bromoanisole) + 18.3 mg (phenylboronic acid) + 20.7 mg (K<sub>2</sub>CO<sub>3</sub>) + 5010 mg (TPG in H<sub>2</sub>O) + 3774 mg (MTBE) – 22.8 mg (99 % product) / 22.8 mg (99 % product) = <b>387.0</b></p> <p>Calculated on conversion</p> |
|------------|-----------------------------------------------------------------------------------------------------------------------------------------------------------------------------------------------------------------------------------------------------------------------------------------------------------------------------------------------------------------------------------------------------------------------------------------------------------------------------------------------------------------------------------------------------------------------------------------------------------------------------------------------------------------------------------------|-----------------------------------------------------------------------------------------------------------------------------------------------------------------------------------------------------------------------------------------------------------------------|

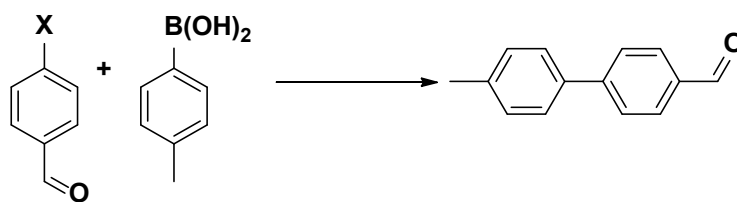

**E-factor = 4.7 (this work - batch)**

|            |                                                                                                                                                                                                                                                                                                                                                                                                                                                                                                     |                                                                                                                                                                                                                                                                                                            |
|------------|-----------------------------------------------------------------------------------------------------------------------------------------------------------------------------------------------------------------------------------------------------------------------------------------------------------------------------------------------------------------------------------------------------------------------------------------------------------------------------------------------------|------------------------------------------------------------------------------------------------------------------------------------------------------------------------------------------------------------------------------------------------------------------------------------------------------------|
| <b>26b</b> | <p>A solution of aryl bromide (0.1 M), aryl boronic acid (1.5 equiv), DBU (1.5 equiv) and Pd(dppf)Cl<sub>2</sub> (2 %) in DMF:water (95:5) was prepared and then pumped at a flow rate of 1 mL/min through the 200 mm x 3 mm Øi SiC reactor at a temperature of 180-240 °C. The crude reaction mixture was concentrated and loaded upon silica and thereafter subjected to flash column silica gel chromatography using a <i>i</i>-hexanes:ethyl acetate gradient to yield the desired product.</p> | <p>1 mmol scale</p> <p>E-factor = (0.185 g (4-bromobenzaldehyde) + 0.204 mg (phenyl boronic acid) + 0.228 g (DBU) + 0.500 g (H<sub>2</sub>O) + 8.968 g (DMF) – 0.161 g (82 % product)) / 0.161 g (82 % product) = <b>63.7</b></p> <p><b>Column chromatography was not included in the calculation.</b></p> |
|------------|-----------------------------------------------------------------------------------------------------------------------------------------------------------------------------------------------------------------------------------------------------------------------------------------------------------------------------------------------------------------------------------------------------------------------------------------------------------------------------------------------------|------------------------------------------------------------------------------------------------------------------------------------------------------------------------------------------------------------------------------------------------------------------------------------------------------------|

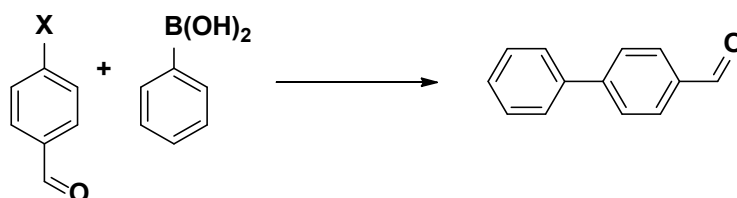

**E-factor = 4.3 (this work - batch)**

**E-factor = 3.9 (this work - flow)**

|            |                                                                                                                                                                                                                                                                                                                                                                                                                                                                                                                                                                                                                                                                                                                                                                                                                                                                                                                                                    |                                                                                                                                                                                                                                                                                                              |
|------------|----------------------------------------------------------------------------------------------------------------------------------------------------------------------------------------------------------------------------------------------------------------------------------------------------------------------------------------------------------------------------------------------------------------------------------------------------------------------------------------------------------------------------------------------------------------------------------------------------------------------------------------------------------------------------------------------------------------------------------------------------------------------------------------------------------------------------------------------------------------------------------------------------------------------------------------------------|--------------------------------------------------------------------------------------------------------------------------------------------------------------------------------------------------------------------------------------------------------------------------------------------------------------|
| <b>26d</b> | <p>A reactant solution containing an aryl halide (0.1 M), arylboronic acid (0.12 M), K<sub>2</sub>CO<sub>3</sub> (0.3 M) in DMF/H<sub>2</sub>O (3:1) solvent was pumped through the reactor with an HPLC pump, and a backpressure valve (45–75 psi) was used to minimize the formation of gas bubbles (see Supporting Information File 1, Figure S6). The residence times of the reactants within the catalytic monoliths were determined based on the known monolith and pore volume and from the different flow rates. Product samples were collected at defined flow periods during a reaction run, weighed and a known amount of dodecane was added to the individual samples as an internal standard. Samples were treated with 1 M aqueous NaOH to remove unreacted arylboronic acid and extracted with DCM. The remaining organic material was then washed three times with distilled water, collected and dried over MgSO<sub>4</sub>.</p> | <p><b>1mmol scale</b></p> <p>E-factor = (0.185 g (4-bromobenzaldehyde) + 0.146 g (phenyl boronic acid) + 0.415 g (K<sub>2</sub>CO<sub>3</sub>) + 7.080 g (DMF) + 2.500 (H<sub>2</sub>O) – 0.173 (95 % product)) / 0.173 (95 % product) = 58.6</p> <p><b>Calculated without work-up and purification.</b></p> |
| <b>26e</b> | <p>A stock solution containing the aryl halide (0.6 mmol, 1 equiv), arylboronic acid (1.2 equiv), base (2 M KOH, 0.9 mL, 3 equiv) in DMF (2 mL) was prepared.</p>                                                                                                                                                                                                                                                                                                                                                                                                                                                                                                                                                                                                                                                                                                                                                                                  | <p>E-factor = (0.111 g (4-bromobenzaldehyde) + 0.0878 g (phenylboronic acid) + 0.900 g (H<sub>2</sub>O) + 0.101 g (KOH) +</p>                                                                                                                                                                                |

|  |  |                                                                                                                                        |
|--|--|----------------------------------------------------------------------------------------------------------------------------------------|
|  |  | 1.888 g (DMF) – 0.0962 (88% product)) / 0.0962 (88% product).<br><br><b>Calculated on conversion without work-up and purification.</b> |
|--|--|----------------------------------------------------------------------------------------------------------------------------------------|

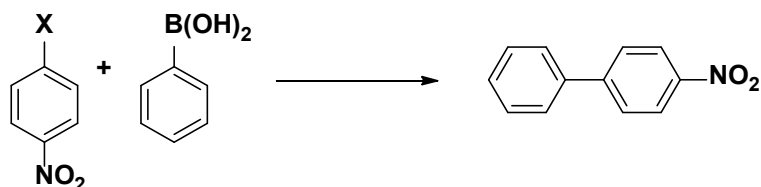

**E-factor = 3.8 (*this work - batch*)**

|            |                                                                                                                                                                                                                                                                                                                                                                                                                                                                                                                                                                                                                                                                       |                                                                                                                                                                                                                                                                                                                                             |
|------------|-----------------------------------------------------------------------------------------------------------------------------------------------------------------------------------------------------------------------------------------------------------------------------------------------------------------------------------------------------------------------------------------------------------------------------------------------------------------------------------------------------------------------------------------------------------------------------------------------------------------------------------------------------------------------|---------------------------------------------------------------------------------------------------------------------------------------------------------------------------------------------------------------------------------------------------------------------------------------------------------------------------------------------|
| <b>26g</b> | <p>The catalyst particles (355–420 μm, selected by sieving) were loaded in the U-tube and prevented from moving along the tube by insertion of a glass rod (outer radius 300 mm) at the end of the catalyst bed. Reactant solution, containing an aryl halide (0.1 M), phenylboronic acid (0.12 M), base (0.25 M) in a solvent mixture consisting of 75 vol.% dimethylformamide (DMF) in water, was pumped through the reactor using the syringe pump. Samples were treated with 1 M aqueous NaOH to remove unreacted PBA, the remaining organic material was then extracted, washed three times with distilled water, collected and dried over MgSO<sub>4</sub>.</p> | <p><b>1mmol scale</b></p> <p>E-factor = (0.202 g (4-bromonitrobenzene) + 0.146 g (phenylboronic acid) + 0.3455 g (K<sub>2</sub>CO<sub>3</sub>) + 7.080 g (DMF) + 2.500 g (H<sub>2</sub>O) – 0.1554 g (74 % product)) / 0.1554 g (74 % product) = <b>65.1</b></p> <p><b>Work-up and purification are excluded from this calculation.</b></p> |
|------------|-----------------------------------------------------------------------------------------------------------------------------------------------------------------------------------------------------------------------------------------------------------------------------------------------------------------------------------------------------------------------------------------------------------------------------------------------------------------------------------------------------------------------------------------------------------------------------------------------------------------------------------------------------------------------|---------------------------------------------------------------------------------------------------------------------------------------------------------------------------------------------------------------------------------------------------------------------------------------------------------------------------------------------|

#### 4. Characterization data

|                                                                                                                                                                                                                                                                                                                                                                                                                                                                                                                                                                                                                                                                                                                                                                                                                              |                                                                                                                            |       |          |            |
|------------------------------------------------------------------------------------------------------------------------------------------------------------------------------------------------------------------------------------------------------------------------------------------------------------------------------------------------------------------------------------------------------------------------------------------------------------------------------------------------------------------------------------------------------------------------------------------------------------------------------------------------------------------------------------------------------------------------------------------------------------------------------------------------------------------------------|----------------------------------------------------------------------------------------------------------------------------|-------|----------|------------|
| Chem.Name                                                                                                                                                                                                                                                                                                                                                                                                                                                                                                                                                                                                                                                                                                                                                                                                                    | [1,1'-biphenyl]-4-carbaldehyde ( <b>3a</b> )                                                                               |       |          |            |
| Lit.Ref                                                                                                                                                                                                                                                                                                                                                                                                                                                                                                                                                                                                                                                                                                                                                                                                                      | Bivona, L.A., Giacalone, F., Vaccaro, L., Aprile, C. and Gruttadauria, M., <i>ChemCatChem</i> , <b>2015</b> , 7, 2526-2533 |       |          |            |
| <div>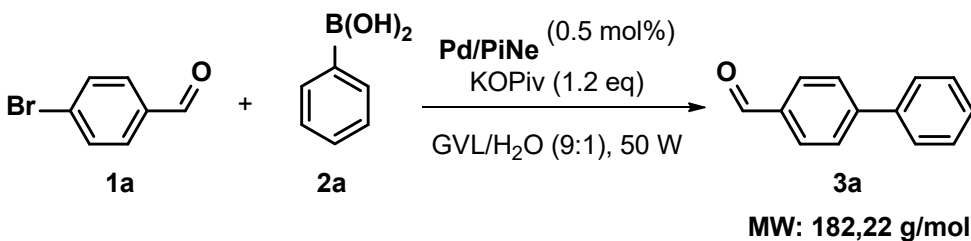<p style="text-align: center;"><b>1a</b> + <b>2a</b> <math>\xrightarrow[\text{GVL/H}_2\text{O (9:1), 50 W}]{\text{Pd/PiNe (0.5 mol\%), KOiPr (1.2 eq)}}</math> <b>3a</b><br/>MW: 182,22 g/mol</p></div>                                                                                                                                                                                                                                                                                                                                                                                                                                                                                                                               |                                                                                                                            |       |          |            |
| <b>Method:</b> <p>In a 10 mL microwave vial equipped with a magnetic stirrer, 4-bromobenzaldehyde <b>1a</b> (0.5 mmol, 93.4 mg, 99 % purity), phenylboronic acid <b>2a</b> (1.1 eq, 68.5 mg, 98 % purity), KOiPr (1.2 eq, 88.5 mg, 95 % purity), <b>Pd/PiNe</b> (8 wt %, 3.3 mg, 0.5 mol%), and GVL:H<sub>2</sub>O (9:1, 0.5 mL) were consecutively added. The reaction was performed in MW cyclic mode (T<sub>min</sub>: 90 °C, T<sub>max</sub>: 120 °C, <math>\mu</math>l: 50 W, 40 cycles). After removing the catalyst by filtration and washing with 0.5 mL of GVL, the water was evaporated and the remaining GVL was recovered (94%) by distillation. The product was precipitated with 1 mL of water at 0 °C and recovered by filtration. The product <b>3a</b> was obtained as white solid (87 mg, 95 % yield).</p> |                                                                                                                            |       |          |            |
| Mol Formula                                                                                                                                                                                                                                                                                                                                                                                                                                                                                                                                                                                                                                                                                                                                                                                                                  | C <sub>13</sub> H <sub>10</sub> O                                                                                          | m.p.  | 58-60 °C |            |
| <b>Elemental Analysis:</b> calc: C, 85.69; H, 5.53; found: C, 85.64; H, 5.61                                                                                                                                                                                                                                                                                                                                                                                                                                                                                                                                                                                                                                                                                                                                                 |                                                                                                                            |       |          |            |
| <b><sup>1</sup>H NMR</b><br>(400 MHz, CDCl <sub>3</sub> )                                                                                                                                                                                                                                                                                                                                                                                                                                                                                                                                                                                                                                                                                                                                                                    | $\delta$ value:                                                                                                            | No. H | Mult     | J value/Hz |
|                                                                                                                                                                                                                                                                                                                                                                                                                                                                                                                                                                                                                                                                                                                                                                                                                              | 10.06                                                                                                                      | 1     | s        |            |
|                                                                                                                                                                                                                                                                                                                                                                                                                                                                                                                                                                                                                                                                                                                                                                                                                              | 7.96                                                                                                                       | 2     | d        | 8.2        |
|                                                                                                                                                                                                                                                                                                                                                                                                                                                                                                                                                                                                                                                                                                                                                                                                                              | 7.76                                                                                                                       | 2     | d        | 8.2        |
|                                                                                                                                                                                                                                                                                                                                                                                                                                                                                                                                                                                                                                                                                                                                                                                                                              | 7.64                                                                                                                       | 2     | d        | 7.3        |
|                                                                                                                                                                                                                                                                                                                                                                                                                                                                                                                                                                                                                                                                                                                                                                                                                              | 7.53-7.46                                                                                                                  | 2     | m        |            |
|                                                                                                                                                                                                                                                                                                                                                                                                                                                                                                                                                                                                                                                                                                                                                                                                                              | 7.45-7.39                                                                                                                  | 1     | m        |            |
| <b><sup>13</sup>C NMR (100.6 Hz, CDCl<sub>3</sub>)</b> $\delta$ : 192.1, 147.4, 139.9, 135.3, 130.4, 129.2, 128.6, 127.8, 127.5                                                                                                                                                                                                                                                                                                                                                                                                                                                                                                                                                                                                                                                                                              |                                                                                                                            |       |          |            |
| <b>GC-EIMS (m/z, %):</b> 182 (M <sup>+</sup> , 100), 181 (79), 154 (14), 153 (39), 152 (84), 151 (29), 150 (12), 127 (13), 74 (21), 63 (12), 51 (15), 50 (15)                                                                                                                                                                                                                                                                                                                                                                                                                                                                                                                                                                                                                                                                |                                                                                                                            |       |          |            |

|                                                                                                                                                                                                                                                                                                                                                                                                                                                                                                                                                                                                                                                                                                                                                                                                               |                                                                                                                                                           |       |           |            |
|---------------------------------------------------------------------------------------------------------------------------------------------------------------------------------------------------------------------------------------------------------------------------------------------------------------------------------------------------------------------------------------------------------------------------------------------------------------------------------------------------------------------------------------------------------------------------------------------------------------------------------------------------------------------------------------------------------------------------------------------------------------------------------------------------------------|-----------------------------------------------------------------------------------------------------------------------------------------------------------|-------|-----------|------------|
| Chem.Name                                                                                                                                                                                                                                                                                                                                                                                                                                                                                                                                                                                                                                                                                                                                                                                                     | 4-nitro-1,1'-biphenyl ( <b>3b</b> )                                                                                                                       |       |           |            |
| Lit.Ref                                                                                                                                                                                                                                                                                                                                                                                                                                                                                                                                                                                                                                                                                                                                                                                                       | E. Ismalaj, G. Strappaveccia, E. Ballerini, F. Elisei, O. Piermatti, D. Gelman, L. Vaccaro <i>ACS Sustainable Chem. Eng.</i> , <b>2014</b> , 2, 2461-2464 |       |           |            |
| <div><div><div><div><div>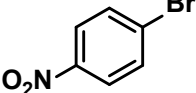</div><div>1b</div></div><div>+</div><div><div><div><div></div><div>2a</div></div></div><div><div><div><div><div><math>\xrightarrow[\text{GVL/H}_2\text{O (9:1), 50 W}]{\text{Pd/PiNe (0.5 mol\%)}, \text{KOiPr (1.2 eq)}}</math></div><div></div></div><div><div><div><div></div><div>3b</div></div><div>MW: 199,21 g/mol</div></div></div></div></div></div></div></div></div></div>                                                                                                                                          |                                                                                                                                                           |       |           |            |
| <b>Method:</b> <p>In a 10 mL microwave vial equipped with a magnetic stirrer, 1-bromo-4-nitrobenzene <b>1b</b> (0.5 mmol, 102 mg, 99% purity), phenylboronic acid <b>2a</b> (1.1 eq, 68.5 mg, 98 % purity), KOiPr (1.2 eq, 88.5 mg, 95 % purity), <b>Pd/PiNe</b> (8 wt %, 3.3 mg, 0.5 mol%), and GVL:H<sub>2</sub>O (9:1, 0.5 mL) were consecutively added. The reaction was performed in MW cyclic mode (T<sub>min</sub>: 90 °C, T<sub>max</sub>: 120 °C, μλ: 50 W, 40 cycles). After removing the catalyst by filtration and washing with 0.5 mL of GVL, the water was evaporated and the remaining GVL was recovered (94%) by distillation. The product was precipitated with 1 mL of water at 0°C and recovered by filtration. The product <b>3b</b> was obtained as white solid (97 mg, 97 % yield).</p> |                                                                                                                                                           |       |           |            |
| Mol Formula                                                                                                                                                                                                                                                                                                                                                                                                                                                                                                                                                                                                                                                                                                                                                                                                   | C <sub>12</sub> H <sub>9</sub> NO <sub>2</sub>                                                                                                            | m.p.  | 116-117°C |            |
| <b>Elemental Analysis:</b> Calc.: C: 72.35; H: 4.55; N: 7.03. found: C, 72.41; H: 4.57; N: 7.11                                                                                                                                                                                                                                                                                                                                                                                                                                                                                                                                                                                                                                                                                                               |                                                                                                                                                           |       |           |            |
| <b><sup>1</sup>H NMR</b><br>(400 MHz, CDCl <sub>3</sub> )                                                                                                                                                                                                                                                                                                                                                                                                                                                                                                                                                                                                                                                                                                                                                     | δ value:                                                                                                                                                  | No. H | Mult      | J value/Hz |
|                                                                                                                                                                                                                                                                                                                                                                                                                                                                                                                                                                                                                                                                                                                                                                                                               | 8.31                                                                                                                                                      | 2     | <i>d</i>  | 8.7        |
|                                                                                                                                                                                                                                                                                                                                                                                                                                                                                                                                                                                                                                                                                                                                                                                                               | 7.74                                                                                                                                                      | 2     | <i>d</i>  | 8.7        |
|                                                                                                                                                                                                                                                                                                                                                                                                                                                                                                                                                                                                                                                                                                                                                                                                               | 7.63                                                                                                                                                      | 2     | <i>d</i>  | 7.2        |
|                                                                                                                                                                                                                                                                                                                                                                                                                                                                                                                                                                                                                                                                                                                                                                                                               | 7.52-7.43                                                                                                                                                 | 3     | <i>m</i>  |            |
| <b><sup>13</sup>C NMR (100.6 Hz, CDCl<sub>3</sub>)</b> δ: 147.8, 147.2, 138.9, 129.3, 129.1, 128.0, 127.5, 124.3.                                                                                                                                                                                                                                                                                                                                                                                                                                                                                                                                                                                                                                                                                             |                                                                                                                                                           |       |           |            |
| <b>GC-EIMS (m/z, %):</b> 199 (M <sup>+</sup> , 100), 169 (37), 153 (23), 152 (77), 141 (26), 115 (12)                                                                                                                                                                                                                                                                                                                                                                                                                                                                                                                                                                                                                                                                                                         |                                                                                                                                                           |       |           |            |

|                                                                                                                                                                                                                                                                                                                                                                                                                                                                                                                                                                                                                                                                                                                                                                                                                   |                                                                                                                                                           |       |            |            |
|-------------------------------------------------------------------------------------------------------------------------------------------------------------------------------------------------------------------------------------------------------------------------------------------------------------------------------------------------------------------------------------------------------------------------------------------------------------------------------------------------------------------------------------------------------------------------------------------------------------------------------------------------------------------------------------------------------------------------------------------------------------------------------------------------------------------|-----------------------------------------------------------------------------------------------------------------------------------------------------------|-------|------------|------------|
| Chem.Name                                                                                                                                                                                                                                                                                                                                                                                                                                                                                                                                                                                                                                                                                                                                                                                                         | 1-([1,1'-biphenyl]-4-yl)ethanone ( <b>3c</b> )                                                                                                            |       |            |            |
| Lit.Ref                                                                                                                                                                                                                                                                                                                                                                                                                                                                                                                                                                                                                                                                                                                                                                                                           | E. Ismalaj, G. Strappaveccia, E. Ballerini, F. Elisei, O. Piermatti, D. Gelman, L. Vaccaro <i>ACS Sustainable Chem. Eng.</i> , <b>2014</b> , 2, 2461-2464 |       |            |            |
| <div>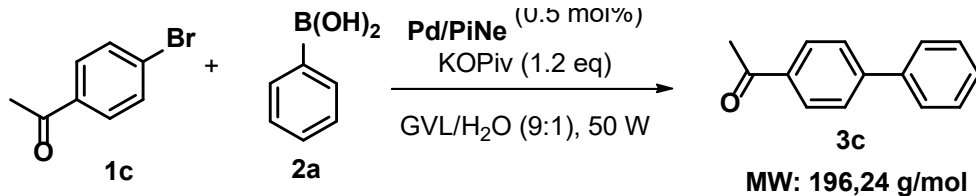<p style="text-align: center;"><b>1c</b> + <b>2a</b> <math>\xrightarrow[\text{GVL/H}_2\text{O (9:1), 50 W}]{\text{Pd/PiNe (0.5 mol\%), KOPIV (1.2 eq)}}</math> <b>3c</b><br/>MW: 196,24 g/mol</p></div>                                                                                                                                                                                                                                                                                                                                                                                                                                                                                                                    |                                                                                                                                                           |       |            |            |
| <b>Method:</b> <p>In a 10 mL microwave vial equipped with a magnetic stirrer, 1-(4-bromophenyl)ethanone <b>1c</b> (0.5 mmol, 101 mg, 98 % purity), phenylboronic acid <b>2a</b> (1.1 eq, 68.5 mg, 98 % purity), KOPIV (1.2 eq, 88.5 mg, 95 % purity), <b>Pd/PiNe</b> (8 wt %, 3.3 mg, 0.5 mol%), and GVL:H<sub>2</sub>O (9:1, 0.5 mL) were consecutively added. The reaction was performed in MW cyclic mode (T<sub>min</sub>: 90 °C, T<sub>max</sub>: 120 °C, μλ: 50 W, 40 cycles). After removing the catalyst by filtration and washing with 0.5 mL of GVL, the water was evaporated and the remaining GVL was recovered (94%) by distillation. The product was precipitated with 1 mL of water at 0°C and recovered by filtration. The product <b>3c</b> was obtained as white solid (88 mg, 90 % yield).</p> |                                                                                                                                                           |       |            |            |
| Mol Formula                                                                                                                                                                                                                                                                                                                                                                                                                                                                                                                                                                                                                                                                                                                                                                                                       | C <sub>14</sub> H <sub>12</sub> O                                                                                                                         | m.p.  | 115-117 °C |            |
| <b>Elemental Analysis:</b> Calc.: C: 85.68; H: 6.16. found: C: 85.74; H: 6.20                                                                                                                                                                                                                                                                                                                                                                                                                                                                                                                                                                                                                                                                                                                                     |                                                                                                                                                           |       |            |            |
| <b><sup>1</sup>H NMR</b><br>(400 MHz, CDCl <sub>3</sub> )                                                                                                                                                                                                                                                                                                                                                                                                                                                                                                                                                                                                                                                                                                                                                         | δ value:                                                                                                                                                  | No. H | Mult       | J value/Hz |
|                                                                                                                                                                                                                                                                                                                                                                                                                                                                                                                                                                                                                                                                                                                                                                                                                   | 8.03                                                                                                                                                      | 2     | <i>d</i>   | 8.3        |
|                                                                                                                                                                                                                                                                                                                                                                                                                                                                                                                                                                                                                                                                                                                                                                                                                   | 7.69                                                                                                                                                      | 2     | <i>d</i>   | 8.3        |
|                                                                                                                                                                                                                                                                                                                                                                                                                                                                                                                                                                                                                                                                                                                                                                                                                   | 7.63                                                                                                                                                      | 2     | <i>d</i>   | 7.5        |
|                                                                                                                                                                                                                                                                                                                                                                                                                                                                                                                                                                                                                                                                                                                                                                                                                   | 7.48                                                                                                                                                      | 2     | <i>t</i>   | 7.2        |
|                                                                                                                                                                                                                                                                                                                                                                                                                                                                                                                                                                                                                                                                                                                                                                                                                   | 7.42-7.38                                                                                                                                                 | 1     | <i>m</i>   |            |
|                                                                                                                                                                                                                                                                                                                                                                                                                                                                                                                                                                                                                                                                                                                                                                                                                   | 2.64                                                                                                                                                      | 3     | <i>s</i>   |            |
| <b><sup>13</sup>C NMR (100.6 Hz, CDCl<sub>3</sub>)</b> δ: 197.9, 145.9, 140.0, 136.0, 129.1, 129.1, 128.4, 127.4, 127.4, 26.8                                                                                                                                                                                                                                                                                                                                                                                                                                                                                                                                                                                                                                                                                     |                                                                                                                                                           |       |            |            |
| <b>GC-EIMS (m/z, %):</b> 196 (M <sup>+</sup> , 14), 195 (88), 180 (100), 153 (53), 152 (79), 151 (22), 76 (22)                                                                                                                                                                                                                                                                                                                                                                                                                                                                                                                                                                                                                                                                                                    |                                                                                                                                                           |       |            |            |



|                                                                                                                                                                                                                                                                                                                                                                                                                                                                                                                                                                                                                                                                                                                                                                                                                                                                                   |                                                                                                                |       |          |            |
|-----------------------------------------------------------------------------------------------------------------------------------------------------------------------------------------------------------------------------------------------------------------------------------------------------------------------------------------------------------------------------------------------------------------------------------------------------------------------------------------------------------------------------------------------------------------------------------------------------------------------------------------------------------------------------------------------------------------------------------------------------------------------------------------------------------------------------------------------------------------------------------|----------------------------------------------------------------------------------------------------------------|-------|----------|------------|
| Chem.Name                                                                                                                                                                                                                                                                                                                                                                                                                                                                                                                                                                                                                                                                                                                                                                                                                                                                         | ethyl [1,1'-biphenyl]-4-carboxylate ( <b>3d</b> )                                                              |       |          |            |
| Lit.Ref                                                                                                                                                                                                                                                                                                                                                                                                                                                                                                                                                                                                                                                                                                                                                                                                                                                                           | Q. Cao, J. L. Howard, E. Wheatley, D. L. Browne, <i>Angew. Chem. Int. Ed.</i> , 2018, <b>57</b> , 11339 -11343 |       |          |            |
| <div>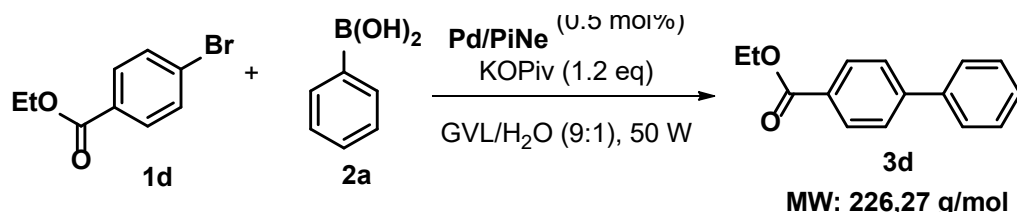</div> <p style="text-align: center;"><b>3d</b><br/>MW: 226,27 g/mol</p>                                                                                                                                                                                                                                                                                                                                                                                                                                                                                                                                                                                                                                                                                                                   |                                                                                                                |       |          |            |
| <b>Method:</b> <p>In a 10 mL microwave vial equipped with a magnetic stirrer, ethyl 4-bromobenzoate <b>1d</b> (0.5 mmol, 82.5 <math>\mu</math>L, 99% purity), phenylboronic acid <b>2a</b> (1.1 eq, 68.5 mg, 98 % purity), KOPiv (1.2 eq, 88.5 mg, 95 % purity), <b>Pd/PiNe</b> (8 wt %, 3.3 mg, 0.5 mol%), and GVL:H<sub>2</sub>O (9:1, 0.5 mL) were consecutively added. The reaction was performed in MW cyclic mode (<math>T_{\min}</math>: 90 °C, <math>T_{\max}</math>: 120 °C, <math>\mu</math><math>\lambda</math>: 50 W, 40 cycles). After removing the catalyst by filtration and washing with 0.5 mL of GVL, the water was evaporated and the remaining GVL was recovered (94%) by distillation. The product was precipitated with 1 mL of water at 0°C and recovered by filtration. The product <b>3d</b> was obtained as pale-yellow solid (113 mg, 99 % yield).</p> |                                                                                                                |       |          |            |
| Mol Formula                                                                                                                                                                                                                                                                                                                                                                                                                                                                                                                                                                                                                                                                                                                                                                                                                                                                       | C <sub>15</sub> H <sub>14</sub> O <sub>2</sub>                                                                 | m.p.  | 92-94°C  |            |
| <b>Elemental Analysis:</b> C: 79.62; H: 6.24; found: C: 79.59; H: 6.26                                                                                                                                                                                                                                                                                                                                                                                                                                                                                                                                                                                                                                                                                                                                                                                                            |                                                                                                                |       |          |            |
| <b><sup>1</sup>H NMR</b><br>(400 MHz, CDCl <sub>3</sub> )                                                                                                                                                                                                                                                                                                                                                                                                                                                                                                                                                                                                                                                                                                                                                                                                                         | $\delta$ value:                                                                                                | No. H | Mult     | J value/Hz |
|                                                                                                                                                                                                                                                                                                                                                                                                                                                                                                                                                                                                                                                                                                                                                                                                                                                                                   | 8.13                                                                                                           | 2     | <i>d</i> | 8.4        |
|                                                                                                                                                                                                                                                                                                                                                                                                                                                                                                                                                                                                                                                                                                                                                                                                                                                                                   | 7.70-7.60                                                                                                      | 4     | <i>m</i> |            |
|                                                                                                                                                                                                                                                                                                                                                                                                                                                                                                                                                                                                                                                                                                                                                                                                                                                                                   | 7.47                                                                                                           | 2     | <i>t</i> | 7.2        |
|                                                                                                                                                                                                                                                                                                                                                                                                                                                                                                                                                                                                                                                                                                                                                                                                                                                                                   | 7.41-7.38                                                                                                      | 1     | <i>m</i> |            |
|                                                                                                                                                                                                                                                                                                                                                                                                                                                                                                                                                                                                                                                                                                                                                                                                                                                                                   | 4.41                                                                                                           | 2     | <i>q</i> | 7.1        |
|                                                                                                                                                                                                                                                                                                                                                                                                                                                                                                                                                                                                                                                                                                                                                                                                                                                                                   | 1.42                                                                                                           | 3     | <i>t</i> | 7.1        |
| <b><sup>13</sup>C NMR (100.6 Hz, CDCl<sub>3</sub>)</b> $\delta$ : 166.7, 145.7, 140.2, 130.2, 129.4, 129.1, 128.3, 127.4, 127.2, 61.1, 14.5                                                                                                                                                                                                                                                                                                                                                                                                                                                                                                                                                                                                                                                                                                                                       |                                                                                                                |       |          |            |
| <b>GC-EIMS (m/z, %):</b> 227 (M <sup>+</sup> + 1, 42), 226 (M <sup>+</sup> , 100), 199 (17), 198 (100), 182 (68), 181 (100), 153 (100), 152 (100), 151 (48), 150 (14), 127 (17), 126 (15), 90 (17), 77 (14), 76 (36), 75 (12)                                                                                                                                                                                                                                                                                                                                                                                                                                                                                                                                                                                                                                                     |                                                                                                                |       |          |            |



|                                                                                                                                                                                                                                                                                                                                                                                                                                                                                                                                                                                                                                                                                                                                                                                                                                                                                                                                                                                                                                              |                                                                            |       |            |            |
|----------------------------------------------------------------------------------------------------------------------------------------------------------------------------------------------------------------------------------------------------------------------------------------------------------------------------------------------------------------------------------------------------------------------------------------------------------------------------------------------------------------------------------------------------------------------------------------------------------------------------------------------------------------------------------------------------------------------------------------------------------------------------------------------------------------------------------------------------------------------------------------------------------------------------------------------------------------------------------------------------------------------------------------------|----------------------------------------------------------------------------|-------|------------|------------|
| Chem.Name                                                                                                                                                                                                                                                                                                                                                                                                                                                                                                                                                                                                                                                                                                                                                                                                                                                                                                                                                                                                                                    | 2-phenylnaphthalene ( <b>3f</b> )                                          |       |            |            |
| Lit.Ref                                                                                                                                                                                                                                                                                                                                                                                                                                                                                                                                                                                                                                                                                                                                                                                                                                                                                                                                                                                                                                      | C. Savarin, L. S. Liebeskind, <i>Org. Lett.</i> 2001, <b>3</b> , 2149-2152 |       |            |            |
| <div><div><div><div><div><div><div><div><div><div><b>1f</b></div><div><b>2a</b></div></div><div><div><div><div><b>3f</b></div><div>MW: 204.27 g/mol</div></div></div></div></div></div><div><b>Method:</b><p>In a 10 mL microwave vial equipped with a magnetic stirrer, 2-bromonaphthalene <b>1f</b> (0.5 mmol, 107 mg, 97% purity), phenylboronic acid <b>2a</b> (1.1 eq, 68.5 mg, 98 % purity), KOiPr (1.2 eq, 88.5 mg, 95% purity), <b>Pd/PiNe</b> (8 wt%, 3.3 mg, 0.5 mol%), and GVL:H<sub>2</sub>O (9:1, 0.5 mL) were consecutively added. The reaction was performed in MW cyclic mode (T<sub>min</sub>: 90 °C, T<sub>max</sub>: 120 °C, μλ: 50 W, 60 cycles). After removing the catalyst by filtration and washing with 0.5 mL of GVL, the water was evaporated and the remaining GVL was recovered (94%) by distillation. The product was precipitated with 1 mL of water at 0°C and recovered by filtration. The product <b>3f</b> was obtained as white solid (82 mg, 80 % yield).</p></div></div></div></div></div></div></div> |                                                                            |       |            |            |
| Mol Formula                                                                                                                                                                                                                                                                                                                                                                                                                                                                                                                                                                                                                                                                                                                                                                                                                                                                                                                                                                                                                                  | C <sub>16</sub> H <sub>12</sub>                                            | m.p.  | 104-105 °C |            |
| <b>Elemental Analysis:</b> calc: C, 94.08; H, 5.92; found: C, 94.13; H, 5.90                                                                                                                                                                                                                                                                                                                                                                                                                                                                                                                                                                                                                                                                                                                                                                                                                                                                                                                                                                 |                                                                            |       |            |            |
| <b><sup>1</sup>H NMR</b><br>(400 MHz, CDCl <sub>3</sub> )                                                                                                                                                                                                                                                                                                                                                                                                                                                                                                                                                                                                                                                                                                                                                                                                                                                                                                                                                                                    | δ value:                                                                   | No. H | Mult       | J value/Hz |
|                                                                                                                                                                                                                                                                                                                                                                                                                                                                                                                                                                                                                                                                                                                                                                                                                                                                                                                                                                                                                                              | 8.06                                                                       | 1     | s          |            |
|                                                                                                                                                                                                                                                                                                                                                                                                                                                                                                                                                                                                                                                                                                                                                                                                                                                                                                                                                                                                                                              | 7.96-7.84                                                                  | 3     | m          |            |
|                                                                                                                                                                                                                                                                                                                                                                                                                                                                                                                                                                                                                                                                                                                                                                                                                                                                                                                                                                                                                                              | 7.79-7.70                                                                  | 3     | m          |            |
|                                                                                                                                                                                                                                                                                                                                                                                                                                                                                                                                                                                                                                                                                                                                                                                                                                                                                                                                                                                                                                              | 7.55-7.46                                                                  | 4     | m          |            |
|                                                                                                                                                                                                                                                                                                                                                                                                                                                                                                                                                                                                                                                                                                                                                                                                                                                                                                                                                                                                                                              | 7.39                                                                       | 1     | t          | 7.4        |
| <b><sup>13</sup>C NMR (100.6 Hz, CDCl<sub>3</sub>)</b> δ: 141.3, 138.7, 133.8, 132.8, 129.0, 128.6, 128.3, 127.8, 127.6, 127.5, 126.4, 126.1, 125.9, 125.7.                                                                                                                                                                                                                                                                                                                                                                                                                                                                                                                                                                                                                                                                                                                                                                                                                                                                                  |                                                                            |       |            |            |
| <b>GC-EIMS (m/z, %):</b> 205 (M <sup>+</sup> +1, 37), 204 (100), 203 (50), 202 (67), 200 (12), 102 (14), 101 (26)                                                                                                                                                                                                                                                                                                                                                                                                                                                                                                                                                                                                                                                                                                                                                                                                                                                                                                                            |                                                                            |       |            |            |

|                                                                                                                                                                                                                                                                                                                                                                                                                                                                                                                                                                                                                                                                                                                                                                                                         |                                                                                                                                                           |       |          |            |
|---------------------------------------------------------------------------------------------------------------------------------------------------------------------------------------------------------------------------------------------------------------------------------------------------------------------------------------------------------------------------------------------------------------------------------------------------------------------------------------------------------------------------------------------------------------------------------------------------------------------------------------------------------------------------------------------------------------------------------------------------------------------------------------------------------|-----------------------------------------------------------------------------------------------------------------------------------------------------------|-------|----------|------------|
| Chem.Name                                                                                                                                                                                                                                                                                                                                                                                                                                                                                                                                                                                                                                                                                                                                                                                               | 4-methyl-1,1'-biphenyl ( <b>3g</b> )                                                                                                                      |       |          |            |
| Lit.Ref                                                                                                                                                                                                                                                                                                                                                                                                                                                                                                                                                                                                                                                                                                                                                                                                 | E. Ismalaj, G. Strappaveccia, E. Ballerini, F. Elisei, O. Piermatti, D. Gelman, L. Vaccaro <i>ACS Sustainable Chem. Eng.</i> , <b>2014</b> , 2, 2461-2464 |       |          |            |
| <div><div><div><div><div>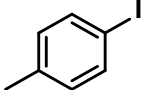</div><div><b>1g</b></div></div><div>+</div><div><div><div><div></div><div><b>2a</b></div></div><div><div><div><div><div></div></div></div><div><div><div><div></div><div><b>3g</b></div></div><div>MW: 168,23 g/mol</div></div></div></div></div></div></div></div></div></div>                                                                                                                                                         |                                                                                                                                                           |       |          |            |
| <b>Method:</b> <p>In a 10 mL microwave vial equipped with a magnetic stirrer, 4-iodo toluene <b>1g</b> (0.5 mmol, 110 mg, 99 % purity) phenylboronic acid <b>2a</b> (1.1 eq, 68.5 mg, 98 % purity), KOiPr (1.2 eq, 88.5 mg, 95% purity), <b>Pd/PiNe</b> (8 wt%, 3.3 mg, 0.5 mol%), and GVL:H<sub>2</sub>O (9:1, 1.0 mL) were consecutively added. The reaction was performed in MW cyclic mode (T<sub>min</sub>: 100 °C, T<sub>max</sub>: 150 °C, μλ: 100 W, 80 cycles). After removing the catalyst by filtration and washing with 0.5 mL of GVL, the water was evaporated and the remaining GVL was recovered (94%) by distillation. The product was precipitated with 1 mL of water at 0°C and recovered by filtration. The product (<b>3g</b>) was obtained as white solid (66 mg, 79 % yield).</p> |                                                                                                                                                           |       |          |            |
| Mol Formula                                                                                                                                                                                                                                                                                                                                                                                                                                                                                                                                                                                                                                                                                                                                                                                             | C <sub>13</sub> H <sub>12</sub>                                                                                                                           | m.p.  | 45-47 °C |            |
| <b>Elemental Analysis:</b> Calc.: C: 92.81; H: 7.19. found: C, 92.74; H: 7.22                                                                                                                                                                                                                                                                                                                                                                                                                                                                                                                                                                                                                                                                                                                           |                                                                                                                                                           |       |          |            |
| <b><sup>1</sup>H NMR</b><br>(400 MHz, CDCl <sub>3</sub> )                                                                                                                                                                                                                                                                                                                                                                                                                                                                                                                                                                                                                                                                                                                                               | δ value:                                                                                                                                                  | No. H | Mult     | J value/Hz |
|                                                                                                                                                                                                                                                                                                                                                                                                                                                                                                                                                                                                                                                                                                                                                                                                         | 7.61                                                                                                                                                      | 2     | <i>d</i> | 7.4        |
|                                                                                                                                                                                                                                                                                                                                                                                                                                                                                                                                                                                                                                                                                                                                                                                                         | 7.52                                                                                                                                                      | 2     | <i>d</i> | 8.0        |
|                                                                                                                                                                                                                                                                                                                                                                                                                                                                                                                                                                                                                                                                                                                                                                                                         | 7.45                                                                                                                                                      | 2     | <i>t</i> | 7.7        |
|                                                                                                                                                                                                                                                                                                                                                                                                                                                                                                                                                                                                                                                                                                                                                                                                         | 7.36                                                                                                                                                      | 1     | <i>t</i> | 7.2        |
|                                                                                                                                                                                                                                                                                                                                                                                                                                                                                                                                                                                                                                                                                                                                                                                                         | 7.29-7.27                                                                                                                                                 | 2     | <i>m</i> |            |
|                                                                                                                                                                                                                                                                                                                                                                                                                                                                                                                                                                                                                                                                                                                                                                                                         | 2.43                                                                                                                                                      | 3     | <i>s</i> |            |
| <b><sup>13</sup>C NMR (100.6 Hz, CDCl<sub>3</sub>)</b> δ: 141.3, 138.5, 137.2, 129.6, 128.9, 127.1, 127.1, 127.1, 21.2                                                                                                                                                                                                                                                                                                                                                                                                                                                                                                                                                                                                                                                                                  |                                                                                                                                                           |       |          |            |
| <b>GC-EIMS (m/z, %):</b> 169 (M <sup>+</sup> +1, 36), 168 (M <sup>+</sup> , 100), 167 (100), 166 (16), 165 (55), 153 (35), 152 (47), 139 (11), 115 (19), 91 (11), 83 (13), 82 (14), 63 (11)                                                                                                                                                                                                                                                                                                                                                                                                                                                                                                                                                                                                             |                                                                                                                                                           |       |          |            |

|                                                                                                                                                                                                                                                                                                                                                                                                                                                                                                                                                                                                                                                                                                                                                                                                          |                                                                                                                                                           |       |          |            |
|----------------------------------------------------------------------------------------------------------------------------------------------------------------------------------------------------------------------------------------------------------------------------------------------------------------------------------------------------------------------------------------------------------------------------------------------------------------------------------------------------------------------------------------------------------------------------------------------------------------------------------------------------------------------------------------------------------------------------------------------------------------------------------------------------------|-----------------------------------------------------------------------------------------------------------------------------------------------------------|-------|----------|------------|
| Chem.Name                                                                                                                                                                                                                                                                                                                                                                                                                                                                                                                                                                                                                                                                                                                                                                                                | 4-methoxy-1,1'-biphenyl ( <b>3h</b> )                                                                                                                     |       |          |            |
| Lit.Ref                                                                                                                                                                                                                                                                                                                                                                                                                                                                                                                                                                                                                                                                                                                                                                                                  | E. Ismalaj, G. Strappaveccia, E. Ballerini, F. Elisei, O. Piermatti, D. Gelman, L. Vaccaro <i>ACS Sustainable Chem. Eng.</i> , <b>2014</b> , 2, 2461-2464 |       |          |            |
| <div><div><div><div><div>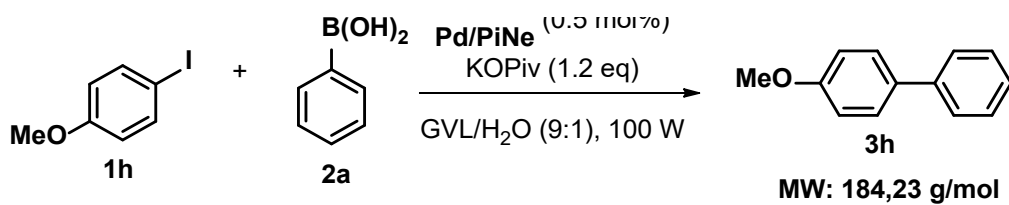</div><div>MW: 184,23 g/mol</div></div></div></div></div>                                                                                                                                                                                                                                                                                                                                                                                                                                                                                                                                                                                                                                     |                                                                                                                                                           |       |          |            |
| <b>Method:</b><br>In a 10 mL microwave vial equipped with a magnetic stirrer, 4-iodo anisole <b>1h</b> (0.5 mmol, 119 mg, 98% purity), phenylboronic acid <b>2a</b> (1.1 eq, 68.5 mg, 98 % purity), KOiPr (1.2 eq, 88.5 mg, 95% purity), <b>Pd/PiNe</b> (8 wt%, 3.3 mg, 0.5 mol%), and GVL:H <sub>2</sub> O (9:1, 0.5 mL) were consecutively added. The reaction was performed in MW cyclic mode (T <sub>min</sub> : 100 °C, T <sub>max</sub> : 150 °C, μλ: 100 W, 80 cycles). After removing the catalyst by filtration and washing with 0.5 mL of GVL, the water was evaporated and the remaining GVL was recovered (94%) by distillation. The product was precipitated with 1 mL of water at 0°C and recovered by filtration. The product <b>3h</b> was obtained as yellow solid (68 mg, 74 % yield). |                                                                                                                                                           |       |          |            |
| Mol Formula                                                                                                                                                                                                                                                                                                                                                                                                                                                                                                                                                                                                                                                                                                                                                                                              | C <sub>13</sub> H <sub>12</sub> O                                                                                                                         | m.p.  | 87-89 °C |            |
| <b>Elemental Analysis:</b> Calc.: C: 84.75; H: 6.57. found: C: 84.78; H: 6.60                                                                                                                                                                                                                                                                                                                                                                                                                                                                                                                                                                                                                                                                                                                            |                                                                                                                                                           |       |          |            |
| <b><sup>1</sup>H NMR</b><br>(400 MHz, CDCl <sub>3</sub> )                                                                                                                                                                                                                                                                                                                                                                                                                                                                                                                                                                                                                                                                                                                                                | δ value:                                                                                                                                                  | No. H | Mult     | J value/Hz |
|                                                                                                                                                                                                                                                                                                                                                                                                                                                                                                                                                                                                                                                                                                                                                                                                          | 7.55                                                                                                                                                      | 4     | <i>t</i> | 7.8        |
|                                                                                                                                                                                                                                                                                                                                                                                                                                                                                                                                                                                                                                                                                                                                                                                                          | 7.42                                                                                                                                                      | 2     | <i>t</i> | 7.4        |
|                                                                                                                                                                                                                                                                                                                                                                                                                                                                                                                                                                                                                                                                                                                                                                                                          | 7.31                                                                                                                                                      | 1     | <i>t</i> | 7.2        |
|                                                                                                                                                                                                                                                                                                                                                                                                                                                                                                                                                                                                                                                                                                                                                                                                          | 6.98                                                                                                                                                      | 2     | <i>d</i> | 8.2        |
|                                                                                                                                                                                                                                                                                                                                                                                                                                                                                                                                                                                                                                                                                                                                                                                                          | 3.86                                                                                                                                                      | 3     | <i>s</i> |            |
| <b><sup>13</sup>C NMR (100.6 Hz, CDCl<sub>3</sub>)</b> δ: 159.3, 141.0, 133.9, 128.9, 128.3, 126.9, 126.8, 114.3, 55.5                                                                                                                                                                                                                                                                                                                                                                                                                                                                                                                                                                                                                                                                                   |                                                                                                                                                           |       |          |            |
| <b>GC-EIMS (m/z, %):</b> 185 (15), 184 (M <sup>+</sup> , 100), 169 (48), 141 (43), 115 (30)                                                                                                                                                                                                                                                                                                                                                                                                                                                                                                                                                                                                                                                                                                              |                                                                                                                                                           |       |          |            |

|                                                                                                                                                                                                                                                                                                                                                                                                                                                                                                                                                                                                                                                                                                                                                                                                                                                              |                                                                                                                                                           |       |          |            |
|--------------------------------------------------------------------------------------------------------------------------------------------------------------------------------------------------------------------------------------------------------------------------------------------------------------------------------------------------------------------------------------------------------------------------------------------------------------------------------------------------------------------------------------------------------------------------------------------------------------------------------------------------------------------------------------------------------------------------------------------------------------------------------------------------------------------------------------------------------------|-----------------------------------------------------------------------------------------------------------------------------------------------------------|-------|----------|------------|
| Chem.Name                                                                                                                                                                                                                                                                                                                                                                                                                                                                                                                                                                                                                                                                                                                                                                                                                                                    | 1,1'-biphenyl ( <b>3i</b> )                                                                                                                               |       |          |            |
| Lit.Ref                                                                                                                                                                                                                                                                                                                                                                                                                                                                                                                                                                                                                                                                                                                                                                                                                                                      | E. Ismalaj, G. Strappaveccia, E. Ballerini, F. Elisei, O. Piermatti, D. Gelman, L. Vaccaro <i>ACS Sustainable Chem. Eng.</i> , <b>2014</b> , 2, 2461-2464 |       |          |            |
| <div><div><div><div><div>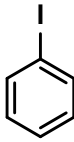</div><div>1i</div></div><div><div></div><div>2a</div></div></div><div><div><div><div><div><math>\xrightarrow[\text{GVL/H}_2\text{O (9:1), 50 W}]{\text{Pd/PiNe (0.5 mol\%)}, \text{KOPiv (1.2 eq)}}</math></div><div></div><div>3i</div><div>MW: 154.21 g/mol</div></div></div></div></div></div></div>                                                                                                                                                                                                                                                                        |                                                                                                                                                           |       |          |            |
| <b>Method:</b> <p>In a 10 mL microwave vial equipped with a magnetic stirrer, iodobenzene <b>1i</b> (0.5 mmol, 57 <math>\mu</math>L, 98% purity), phenylboronic acid <b>2a</b> (1.1 eq, 68.5 mg, 98 % purity), KOPiv (1.2 eq, 88.5 mg, 95% purity), <b>Pd/PiNe</b> (8 wt%, 3.3 mg, 0.5 mol%), and GVL:H<sub>2</sub>O (9:1, 0.5 mL) were consecutively added. The reaction was performed in MW cyclic mode (<math>T_{\text{min}}</math>: 100 °C, <math>T_{\text{max}}</math>: 150 °C, <math>\mu\lambda</math>: 50 W, 40 cycles). After removing the catalyst by filtration and washing with 0.5 mL of GVL, the water was evaporated and the remaining GVL was recovered (94%) by distillation. The product was precipitated with 1 mL of water at 0°C and recovered by filtration. The product <b>3i</b> was obtained as white solid (66 mg, 86 % yield).</p> |                                                                                                                                                           |       |          |            |
| Mol Formula                                                                                                                                                                                                                                                                                                                                                                                                                                                                                                                                                                                                                                                                                                                                                                                                                                                  | C <sub>12</sub> H <sub>10</sub>                                                                                                                           | m.p.  | 70-71 °C |            |
| <b>Elemental Analysis:</b> calc: C, 93.46; H, 6.54; found: C, 93.39; H, 6.59                                                                                                                                                                                                                                                                                                                                                                                                                                                                                                                                                                                                                                                                                                                                                                                 |                                                                                                                                                           |       |          |            |
| <b><sup>1</sup>H NMR</b><br>(400 MHz, CDCl <sub>3</sub> )                                                                                                                                                                                                                                                                                                                                                                                                                                                                                                                                                                                                                                                                                                                                                                                                    | $\delta$ value:                                                                                                                                           | No. H | Mult     | J value/Hz |
|                                                                                                                                                                                                                                                                                                                                                                                                                                                                                                                                                                                                                                                                                                                                                                                                                                                              | 7.60                                                                                                                                                      | 4     | <i>d</i> | 7.4        |
|                                                                                                                                                                                                                                                                                                                                                                                                                                                                                                                                                                                                                                                                                                                                                                                                                                                              | 7.45                                                                                                                                                      | 4     | <i>t</i> | 7.4        |
|                                                                                                                                                                                                                                                                                                                                                                                                                                                                                                                                                                                                                                                                                                                                                                                                                                                              | 7.35                                                                                                                                                      | 2     | <i>t</i> | 7.3        |
| <b><sup>13</sup>C NMR (100.6 Hz, CDCl<sub>3</sub>)</b> $\delta$ : 141.4, 128.9, 127.4, 127.3                                                                                                                                                                                                                                                                                                                                                                                                                                                                                                                                                                                                                                                                                                                                                                 |                                                                                                                                                           |       |          |            |
| <b>GC-EIMS (m/z, %):</b> 155 (M <sup>+</sup> +1, 13), 154 (M <sup>+</sup> , 100), 153 (37), 152 (25), 76 (13)                                                                                                                                                                                                                                                                                                                                                                                                                                                                                                                                                                                                                                                                                                                                                |                                                                                                                                                           |       |          |            |



|                                                                                                                                                                                                                                                                                                                                                                                                                                                                                                                                                                                                                                                                                                                                                                                                                |                                                                         |       |            |            |
|----------------------------------------------------------------------------------------------------------------------------------------------------------------------------------------------------------------------------------------------------------------------------------------------------------------------------------------------------------------------------------------------------------------------------------------------------------------------------------------------------------------------------------------------------------------------------------------------------------------------------------------------------------------------------------------------------------------------------------------------------------------------------------------------------------------|-------------------------------------------------------------------------|-------|------------|------------|
| Chem.Name                                                                                                                                                                                                                                                                                                                                                                                                                                                                                                                                                                                                                                                                                                                                                                                                      | 2-nitro-4-phenylpyridine ( <b>3k</b> )                                  |       |            |            |
| Lit.Ref                                                                                                                                                                                                                                                                                                                                                                                                                                                                                                                                                                                                                                                                                                                                                                                                        | M.L.N. Rao, R.J. Dhanorkar, <i>Eur. J. Org. Chem.</i> , 2014: 5214-5228 |       |            |            |
| <div>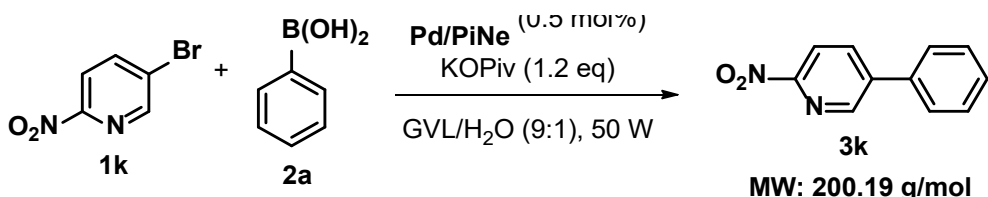</div>                                                                                                                                                                                                                                                                                                                                                                                                                                                                                                                                                                                                                                                                                                                  |                                                                         |       |            |            |
| <b>Method:</b> <p>In a 10 mL microwave vial equipped with a magnetic stirrer, 5-bromo-2-nitropyridine <b>1k</b> (0.5 mmol, 102.5 mg, 99% purity), phenylboronic acid <b>2a</b> (1.1 eq, 68.5 mg, 98 % purity), KOiPr (1.2 eq, 88.5 mg, 95% purity), <b>Pd/PiNe</b> (8 wt%, 3.3 mg, 0.5 mol%), and GVL:H<sub>2</sub>O (9:1, 0.5 mL) were consecutively added. The reaction was performed in MW cyclic mode (T<sub>min</sub>: 90 °C, T<sub>max</sub>: 120 °C, μλ: 50 W, 40 cycles). After removing the catalyst by filtration and washing with 0.5 mL of GVL, the water was evaporated and the remaining GVL was recovered (94%) by distillation. The product was precipitated with 1 mL of water at 0°C and recovered by filtration. The product <b>3k</b> was obtained as white solid (99 mg, 99 % yield).</p> |                                                                         |       |            |            |
| Mol Formula                                                                                                                                                                                                                                                                                                                                                                                                                                                                                                                                                                                                                                                                                                                                                                                                    | C <sub>11</sub> H <sub>8</sub> N <sub>2</sub> O <sub>2</sub>            | m.p.  | 115-117 °C |            |
| <b>Elemental Analysis:</b> calc C, 66.00; H, 4.03; N, 13.99; found: C, 65.90; H, 4.07; N, 14.02                                                                                                                                                                                                                                                                                                                                                                                                                                                                                                                                                                                                                                                                                                                |                                                                         |       |            |            |
| <b><sup>1</sup>H NMR</b><br>(400 MHz, CDCl <sub>3</sub> )                                                                                                                                                                                                                                                                                                                                                                                                                                                                                                                                                                                                                                                                                                                                                      | δ value:                                                                | No. H | Mult       | J value/Hz |
|                                                                                                                                                                                                                                                                                                                                                                                                                                                                                                                                                                                                                                                                                                                                                                                                                | 8.85                                                                    | 1     | <i>d</i>   | 1.8        |
|                                                                                                                                                                                                                                                                                                                                                                                                                                                                                                                                                                                                                                                                                                                                                                                                                | 8.35                                                                    | 1     | <i>d</i>   | 8.5        |
|                                                                                                                                                                                                                                                                                                                                                                                                                                                                                                                                                                                                                                                                                                                                                                                                                | 8.19                                                                    | 1     | <i>dd</i>  | 8.4, 2.0   |
|                                                                                                                                                                                                                                                                                                                                                                                                                                                                                                                                                                                                                                                                                                                                                                                                                | 7.64                                                                    | 2     | <i>d</i>   | 6.8        |
|                                                                                                                                                                                                                                                                                                                                                                                                                                                                                                                                                                                                                                                                                                                                                                                                                | 7.59-7.49                                                               | 3     | <i>m</i>   |            |
| <b><sup>13</sup>C NMR (100.6 Hz, CDCl<sub>3</sub>)</b> δ: 147.4, 142.6, 137.9, 135.5, 129.9, 129.7, 127.7, 118.3                                                                                                                                                                                                                                                                                                                                                                                                                                                                                                                                                                                                                                                                                               |                                                                         |       |            |            |
| <b>GC-EIMS (m/z, %):</b> 200 (M <sup>+</sup> , 38), 155 (13), 152 (100), 128 (22), 127 (50), 77 (13)                                                                                                                                                                                                                                                                                                                                                                                                                                                                                                                                                                                                                                                                                                           |                                                                         |       |            |            |



|                                                                                                                                                                                                                                                                                                                                                                                                                                                                                                                                                                                                                                                                                                                                                                                                                                                                                                            |                                                                                                                            |       |                    |            |
|------------------------------------------------------------------------------------------------------------------------------------------------------------------------------------------------------------------------------------------------------------------------------------------------------------------------------------------------------------------------------------------------------------------------------------------------------------------------------------------------------------------------------------------------------------------------------------------------------------------------------------------------------------------------------------------------------------------------------------------------------------------------------------------------------------------------------------------------------------------------------------------------------------|----------------------------------------------------------------------------------------------------------------------------|-------|--------------------|------------|
| Chem.Name                                                                                                                                                                                                                                                                                                                                                                                                                                                                                                                                                                                                                                                                                                                                                                                                                                                                                                  | [1,1'-biphenyl]-4-carbaldehyde ( <b>3a</b> )                                                                               |       |                    |            |
| Lit.Ref                                                                                                                                                                                                                                                                                                                                                                                                                                                                                                                                                                                                                                                                                                                                                                                                                                                                                                    | Bivona, L.A., Giacalone, F., Vaccaro, L., Aprile, C. and Gruttadauria, M., <i>ChemCatChem</i> , <b>2015</b> , 7, 2526-2533 |       |                    |            |
| <div><div><div><div><div>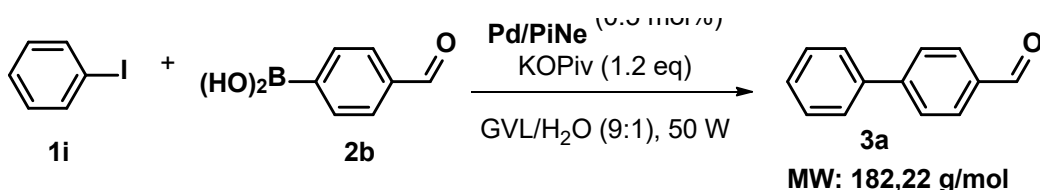</div></div><div><div><b>1i</b></div><div><b>2b</b></div><div><b>3a</b></div><div><b>MW: 182,22 g/mol</b></div></div></div></div></div>                                                                                                                                                                                                                                                                                                                                                                                                                                                                                                                                                                                                                                                         |                                                                                                                            |       |                    |            |
| <b>Method:</b> <p>In a 10 mL microwave vial equipped with a magnetic stirrer, iodobenzene <b>1i</b> (0.5 mmol, 57 <math>\mu</math>L, 98% purity), (4-formylphenyl)boronic acid <b>2b</b> (1.1 eq, 86.8 mg, 95% purity), KOPiv (1.2 eq), <b>Pd/PiNe</b> (0.5 mol%), and GVL:H<sub>2</sub>O (9:1, 0.5 mL) were consecutively added. The reaction was performed in MW cyclic mode (<math>T_{\text{min}}</math>: 100 <math>^{\circ}</math>C, <math>T_{\text{max}}</math>: 150 <math>^{\circ}</math>C, <math>\mu</math><math>\lambda</math>: 50 W, 60 cycles). After removing the catalyst by filtration and washing with 0.5 mL of GVL, the water was evaporated and the remaining GVL was recovered (94%) by distillation. The product was precipitated with 1 mL of water at 0<math>^{\circ}</math>C and recovered by filtration. The product <b>3a</b> was obtained as white solid (75 mg, 82 % yield).</p> |                                                                                                                            |       |                    |            |
| Mol Formula                                                                                                                                                                                                                                                                                                                                                                                                                                                                                                                                                                                                                                                                                                                                                                                                                                                                                                | C <sub>13</sub> H <sub>10</sub> O                                                                                          | m.p.  | 58-60 $^{\circ}$ C |            |
| <b>Elemental Analysis:</b> calc: C, 85.69; H, 5.53; found: C, 85.64; H, 5.61                                                                                                                                                                                                                                                                                                                                                                                                                                                                                                                                                                                                                                                                                                                                                                                                                               |                                                                                                                            |       |                    |            |
| <b><sup>1</sup>H NMR</b><br>(400 MHz, CDCl <sub>3</sub> )                                                                                                                                                                                                                                                                                                                                                                                                                                                                                                                                                                                                                                                                                                                                                                                                                                                  | $\delta$ value:                                                                                                            | No. H | Mult               | J value/Hz |
|                                                                                                                                                                                                                                                                                                                                                                                                                                                                                                                                                                                                                                                                                                                                                                                                                                                                                                            | 10.06                                                                                                                      | 1     | s                  |            |
|                                                                                                                                                                                                                                                                                                                                                                                                                                                                                                                                                                                                                                                                                                                                                                                                                                                                                                            | 7.96                                                                                                                       | 2     | d                  | 8.2        |
|                                                                                                                                                                                                                                                                                                                                                                                                                                                                                                                                                                                                                                                                                                                                                                                                                                                                                                            | 7.76                                                                                                                       | 2     | d                  | 8.2        |
|                                                                                                                                                                                                                                                                                                                                                                                                                                                                                                                                                                                                                                                                                                                                                                                                                                                                                                            | 7.64                                                                                                                       | 2     | d                  | 7.3        |
|                                                                                                                                                                                                                                                                                                                                                                                                                                                                                                                                                                                                                                                                                                                                                                                                                                                                                                            | 7.53-7.46                                                                                                                  | 2     | m                  |            |
|                                                                                                                                                                                                                                                                                                                                                                                                                                                                                                                                                                                                                                                                                                                                                                                                                                                                                                            | 7.45-7.39                                                                                                                  | 1     | m                  |            |
| <b><sup>13</sup>C NMR (100.6 Hz, CDCl<sub>3</sub>)</b> $\delta$ : 192.1, 147.4, 139.9, 135.3, 130.4, 129.2, 128.6, 127.8, 127.5                                                                                                                                                                                                                                                                                                                                                                                                                                                                                                                                                                                                                                                                                                                                                                            |                                                                                                                            |       |                    |            |
| <b>GC-EIMS (m/z, %):</b> 182 (M <sup>+</sup> , 100), 181 (79), 154 (14), 153 (39), 152 (84), 151 (29), 150 (12), 127 (13), 74 (21), 63 (12), 51 (15), 50 (15)                                                                                                                                                                                                                                                                                                                                                                                                                                                                                                                                                                                                                                                                                                                                              |                                                                                                                            |       |                    |            |

|                                                                                                                                                                                                                                                                                                                                                                                                                                                                                                                                                                                                                                                                                                                                                                                                                                                                                                                                     |                                                                                                             |       |                    |            |
|-------------------------------------------------------------------------------------------------------------------------------------------------------------------------------------------------------------------------------------------------------------------------------------------------------------------------------------------------------------------------------------------------------------------------------------------------------------------------------------------------------------------------------------------------------------------------------------------------------------------------------------------------------------------------------------------------------------------------------------------------------------------------------------------------------------------------------------------------------------------------------------------------------------------------------------|-------------------------------------------------------------------------------------------------------------|-------|--------------------|------------|
| Chem.Name                                                                                                                                                                                                                                                                                                                                                                                                                                                                                                                                                                                                                                                                                                                                                                                                                                                                                                                           | 4-chloro-1,1'-biphenyl ( <b>3e</b> )                                                                        |       |                    |            |
| Lit.Ref                                                                                                                                                                                                                                                                                                                                                                                                                                                                                                                                                                                                                                                                                                                                                                                                                                                                                                                             | E. Shirakawa, K.-i. Itoh, T. Higashino, T. Hayashi, <i>J. Am. Chem. Soc.</i> 2010, <b>132</b> , 15537–15539 |       |                    |            |
| <div><div><div><div><div><div>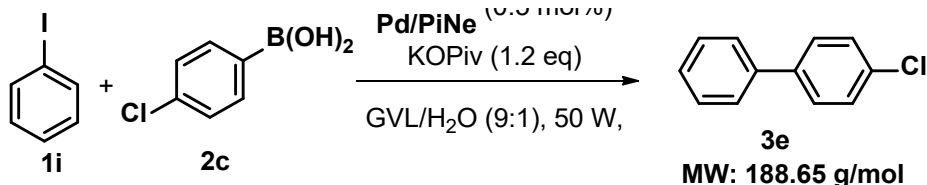</div></div></div><div><p><b>3e</b><br/>MW: 188.65 g/mol</p></div></div></div></div>                                                                                                                                                                                                                                                                                                                                                                                                                                                                                                                                                                                                                                                                                                                                |                                                                                                             |       |                    |            |
| <b>Method:</b> <p>In a 10 mL microwave vial equipped with a magnetic stirrer, iodobenzene <b>1i</b> (0.5 mmol, 57 <math>\mu</math>L, 98% purity), 4-chloro phenylboronic acid <b>2c</b> (1.1 eq, 90.5 mg, 95% purity), KOiPr (1.2 eq, 88.5 mg, 95 % purity), <b>Pd/PiNe</b> (8 wt %, 3.3 mg, 0.5 mol%), and GVL:H<sub>2</sub>O (9:1, 0.5 mL) were consecutively added. The reaction was performed in MW cyclic mode (<math>T_{\min}</math>: 100 <math>^{\circ}</math>C, <math>T_{\max}</math>: 150 <math>^{\circ}</math>C, <math>\mu</math><math>\lambda</math>: 50 W, 60 cycles). After removing the catalyst by filtration and washing with 0.5 mL of GVL, the water was evaporated and the remaining GVL was recovered (94%) by distillation. The product was precipitated with 1 mL of water at 0<math>^{\circ}</math>C and recovered by filtration. The product <b>3e</b> was obtained as white solid (51 mg, 54 % yield).</p> |                                                                                                             |       |                    |            |
| Mol Formula                                                                                                                                                                                                                                                                                                                                                                                                                                                                                                                                                                                                                                                                                                                                                                                                                                                                                                                         | C <sub>11</sub> H <sub>9</sub> Cl                                                                           | m.p.  | 77-79 $^{\circ}$ C |            |
| <b>Elemental Analysis:</b> calc: C, 76.40; H, 4.81; found: C, 76.37; H, 4.87.                                                                                                                                                                                                                                                                                                                                                                                                                                                                                                                                                                                                                                                                                                                                                                                                                                                       |                                                                                                             |       |                    |            |
| <sup>1</sup> H NMR<br>(400 MHz, CDCl <sub>3</sub> )                                                                                                                                                                                                                                                                                                                                                                                                                                                                                                                                                                                                                                                                                                                                                                                                                                                                                 | $\delta$ value:                                                                                             | No. H | Mult               | J value/Hz |
|                                                                                                                                                                                                                                                                                                                                                                                                                                                                                                                                                                                                                                                                                                                                                                                                                                                                                                                                     | 7.59-7.50                                                                                                   | 4     | <i>m</i>           |            |
|                                                                                                                                                                                                                                                                                                                                                                                                                                                                                                                                                                                                                                                                                                                                                                                                                                                                                                                                     | 7.49-7.36                                                                                                   | 5     | <i>m</i>           |            |
| <sup>13</sup> C NMR (100.6 Hz, CDCl <sub>3</sub> ) $\delta$ : 140.1, 139.8, 133.5, 129.0, 128.5, 127.7, 127.1                                                                                                                                                                                                                                                                                                                                                                                                                                                                                                                                                                                                                                                                                                                                                                                                                       |                                                                                                             |       |                    |            |
| <b>GC-EIMS (m/z, %):</b> 190 (34), 188 (M <sup>+</sup> , 100), 153 (26), 152 (41)                                                                                                                                                                                                                                                                                                                                                                                                                                                                                                                                                                                                                                                                                                                                                                                                                                                   |                                                                                                             |       |                    |            |



|                                                                                                                                                                                                                                                                                                                                                                                                                                                                                                                                                                                                                                                                                                                                                                                                                            |                                                                                                                                                 |       |            |            |
|----------------------------------------------------------------------------------------------------------------------------------------------------------------------------------------------------------------------------------------------------------------------------------------------------------------------------------------------------------------------------------------------------------------------------------------------------------------------------------------------------------------------------------------------------------------------------------------------------------------------------------------------------------------------------------------------------------------------------------------------------------------------------------------------------------------------------|-------------------------------------------------------------------------------------------------------------------------------------------------|-------|------------|------------|
| Chem.Name                                                                                                                                                                                                                                                                                                                                                                                                                                                                                                                                                                                                                                                                                                                                                                                                                  | 4'-methoxy-[1,1'-biphenyl]-4-carbaldehyde ( <b>3m</b> )                                                                                         |       |            |            |
| Lit.Ref                                                                                                                                                                                                                                                                                                                                                                                                                                                                                                                                                                                                                                                                                                                                                                                                                    | S.-L. Mao, Y. Sun, G.-A. Yu, C. Zhao, Z.-J. Han, J. Yuan, X. Zhu, Q. Yangand, S.-H. Liu <i>Org. Biomol. Chem.</i> , 2012, <b>10</b> , 9410-9417 |       |            |            |
| <div><div><div><div><div>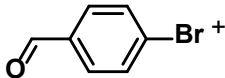</div><div>1a</div></div><div><div></div><div>2e</div></div><div><div><div><div></div><div>3m</div></div><div>MW: 212.24 g/mol</div></div></div><div><div><div><div><div><math>\text{Pd/PiNe}</math> (0.5 mol %)</div><div>KOPiv (1.2 eq)</div></div><div><div>GVL/H<sub>2</sub>O (9:1), 50 W</div></div></div></div></div></div></div></div>                                                                                                                                                                                                |                                                                                                                                                 |       |            |            |
| <b>Method:</b> <p>In a 10 mL microwave vial equipped with a magnetic stirrer, 4-bromobenzaldehyde <b>1a</b> (0.5 mmol, 93.4 mg, 99 % purity), (4-methoxyphenyl)boronic acid <b>2e</b> (1.1 eq, 86 mg, 97% purity), KOPiv (1.2 eq, 88.5 mg, 95 % purity), <b>Pd/PiNe</b> (8 wt %, 3.3 mg, 0.5 mol%), and GVL:H<sub>2</sub>O (9:1, 0.5 mL) were consecutively added. The reaction was performed in MW cyclic mode (T<sub>min</sub>: 90 °C, T<sub>max</sub>: 120 °C, μλ: 50 W, 40 cycles). After removing the catalyst by filtration and washing with 0.5 mL of GVL, the water was evaporated and the remaining GVL was recovered (94%) by distillation. The product was precipitated with 1 mL of water at 0°C and recovered by filtration. The product <b>3m</b> was obtained as pale-yellow solid (98 mg, 93 % yield).</p> |                                                                                                                                                 |       |            |            |
| Mol Formula                                                                                                                                                                                                                                                                                                                                                                                                                                                                                                                                                                                                                                                                                                                                                                                                                | C <sub>14</sub> H <sub>12</sub> O <sub>2</sub>                                                                                                  | m.p.  | 100-102 °C |            |
| <b>Elemental Analysis:</b> calc: C, 79.22; H, 5.70; found: C, 79.16; H, 5.74                                                                                                                                                                                                                                                                                                                                                                                                                                                                                                                                                                                                                                                                                                                                               |                                                                                                                                                 |       |            |            |
| <b><sup>1</sup>H NMR</b><br>(400 MHz, CDCl <sub>3</sub> )                                                                                                                                                                                                                                                                                                                                                                                                                                                                                                                                                                                                                                                                                                                                                                  | δ value:                                                                                                                                        | No. H | Mult       | J value/Hz |
|                                                                                                                                                                                                                                                                                                                                                                                                                                                                                                                                                                                                                                                                                                                                                                                                                            | 10.04                                                                                                                                           | 1     | s          |            |
|                                                                                                                                                                                                                                                                                                                                                                                                                                                                                                                                                                                                                                                                                                                                                                                                                            | 7.93                                                                                                                                            | 2     | d          | 8.2        |
|                                                                                                                                                                                                                                                                                                                                                                                                                                                                                                                                                                                                                                                                                                                                                                                                                            | 7.72                                                                                                                                            | 2     | d          | 8.2        |
|                                                                                                                                                                                                                                                                                                                                                                                                                                                                                                                                                                                                                                                                                                                                                                                                                            | 7.60                                                                                                                                            | 2     | d          | 8.8        |
|                                                                                                                                                                                                                                                                                                                                                                                                                                                                                                                                                                                                                                                                                                                                                                                                                            | 7.01                                                                                                                                            | 2     | d          | 8.7        |
|                                                                                                                                                                                                                                                                                                                                                                                                                                                                                                                                                                                                                                                                                                                                                                                                                            | 3.87                                                                                                                                            | 3     | s          |            |
| <b><sup>13</sup>C NMR (100.6 Hz, CDCl<sub>3</sub>)</b> δ: 192.1, 160.3, 147.0, 134.8, 132.2, 130.5, 128.7, 127.2, 114.6, 55.6                                                                                                                                                                                                                                                                                                                                                                                                                                                                                                                                                                                                                                                                                              |                                                                                                                                                 |       |            |            |
| <b>GC-EIMS (m/z, %):</b> 213 (M <sup>+</sup> +1, 15), 212 (M <sup>+</sup> , 100), 211 (37), 197 (11), 141 (16), 139 (21), 115 (13)                                                                                                                                                                                                                                                                                                                                                                                                                                                                                                                                                                                                                                                                                         |                                                                                                                                                 |       |            |            |

|                                                                                                                                                                                                                                                                                                                                                                                                                                                                                                                                                                                                                                                                                                                                                                                                                   |                                                                   |       |            |            |
|-------------------------------------------------------------------------------------------------------------------------------------------------------------------------------------------------------------------------------------------------------------------------------------------------------------------------------------------------------------------------------------------------------------------------------------------------------------------------------------------------------------------------------------------------------------------------------------------------------------------------------------------------------------------------------------------------------------------------------------------------------------------------------------------------------------------|-------------------------------------------------------------------|-------|------------|------------|
| Chem.Name                                                                                                                                                                                                                                                                                                                                                                                                                                                                                                                                                                                                                                                                                                                                                                                                         | 4'-methyl-[1,1'-biphenyl]-4-carbaldehyde ( <b>3n</b> )            |       |            |            |
| Lit.Ref                                                                                                                                                                                                                                                                                                                                                                                                                                                                                                                                                                                                                                                                                                                                                                                                           | X. Chen, H. Ke, G. Zou <i>ACS Catal.</i> 2014, <b>4</b> , 379–385 |       |            |            |
| <div>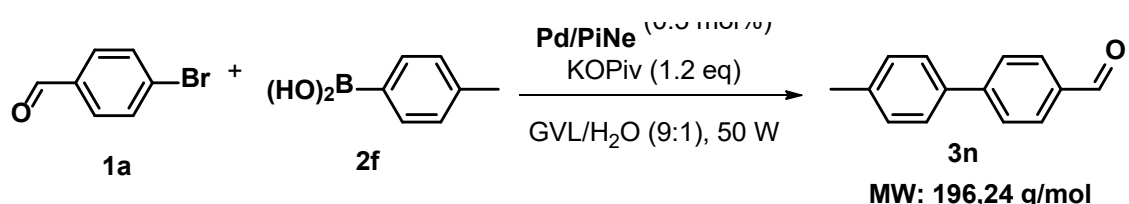</div> <p style="text-align: center;"><b>1a</b>                      <b>2f</b>                      <b>3n</b><br/>MW: 196,24 g/mol</p>                                                                                                                                                                                                                                                                                                                                                                                                                                                                                                                                                                                     |                                                                   |       |            |            |
| <b>Method:</b> <p>In a 10 mL microwave vial equipped with a magnetic stirrer, 4-bromobenzaldehyde <b>1a</b> (0.5 mmol, 93.4 mg, 99 % purity), p-tolylboronic acid <b>2f</b> (1.1 eq, 76.3 mg, 98% purity), KOiPr (1.2 eq, 88.5 mg, 95 % purity), <b>Pd/PiNe</b> (8 wt%, 3.3 mg, 0.5 mol%), and GVL:H<sub>2</sub>O (9:1, 0.5 mL) were consecutively added. The reaction was performed in MW cyclic mode (T<sub>min</sub>: 90 °C, T<sub>max</sub>: 120 °C, μλ: 50 W, 40 cycles). After removing the catalyst by filtration and washing with 0.5 mL of GVL, the water was evaporated and the remaining GVL was recovered (94%) by distillation. The product was precipitated with 1 mL of water at 0°C and recovered by filtration. The product <b>3n</b> was obtained as pale-yellow solid (82 mg, 84 % yield).</p> |                                                                   |       |            |            |
| Mol Formula                                                                                                                                                                                                                                                                                                                                                                                                                                                                                                                                                                                                                                                                                                                                                                                                       | C <sub>14</sub> H <sub>12</sub> O                                 | m.p.  | 105-107 °C |            |
| <b>Elemental Analysis:</b> calc: C, 85.68; H, 6.16; found: C, 85.61; H, 6.19;                                                                                                                                                                                                                                                                                                                                                                                                                                                                                                                                                                                                                                                                                                                                     |                                                                   |       |            |            |
| <b><sup>1</sup>H NMR</b><br>(400 MHz, CDCl <sub>3</sub> )                                                                                                                                                                                                                                                                                                                                                                                                                                                                                                                                                                                                                                                                                                                                                         | δ value:                                                          | No. H | Mult       | J value/Hz |
|                                                                                                                                                                                                                                                                                                                                                                                                                                                                                                                                                                                                                                                                                                                                                                                                                   | 10.05                                                             | 1     | s          |            |
|                                                                                                                                                                                                                                                                                                                                                                                                                                                                                                                                                                                                                                                                                                                                                                                                                   | 7.94                                                              | 2     | d          | 8.0        |
|                                                                                                                                                                                                                                                                                                                                                                                                                                                                                                                                                                                                                                                                                                                                                                                                                   | 7.74                                                              | 2     | d          | 8.0        |
|                                                                                                                                                                                                                                                                                                                                                                                                                                                                                                                                                                                                                                                                                                                                                                                                                   | 7.55                                                              | 2     | d          | 7.8        |
|                                                                                                                                                                                                                                                                                                                                                                                                                                                                                                                                                                                                                                                                                                                                                                                                                   | 7.29                                                              | 2     | d          | 7.8        |
|                                                                                                                                                                                                                                                                                                                                                                                                                                                                                                                                                                                                                                                                                                                                                                                                                   | 2.42                                                              | 3     | s          |            |
| <b><sup>13</sup>C NMR (100.6 Hz, CDCl<sub>3</sub>)</b> δ: 192.1, 147.3, 138.7, 137.0, 135.1, 130.4, 129.9, 127.6, 127.4, 21.3                                                                                                                                                                                                                                                                                                                                                                                                                                                                                                                                                                                                                                                                                     |                                                                   |       |            |            |
| <b>GC-EIMS (m/z, %):</b> 197 (M <sup>+</sup> +1, 40), 196 (M <sup>+</sup> , 100), 195 (100), 168 (15), 167 (59), 166 (29), 155 (88), 153 (18), 152 (100), 151 (17), 139 (16), 115 (24), 97 (13), 84 (13), 83 (22), 82 (25), 63 (17), 51 (12)                                                                                                                                                                                                                                                                                                                                                                                                                                                                                                                                                                      |                                                                   |       |            |            |

|                                                                                                                                                                                                                                                                                                                                                                                                                                                                                                                                                                                                                                                                                                                                                                                                                                                       |                                                                                                           |       |            |            |
|-------------------------------------------------------------------------------------------------------------------------------------------------------------------------------------------------------------------------------------------------------------------------------------------------------------------------------------------------------------------------------------------------------------------------------------------------------------------------------------------------------------------------------------------------------------------------------------------------------------------------------------------------------------------------------------------------------------------------------------------------------------------------------------------------------------------------------------------------------|-----------------------------------------------------------------------------------------------------------|-------|------------|------------|
| Chem.Name                                                                                                                                                                                                                                                                                                                                                                                                                                                                                                                                                                                                                                                                                                                                                                                                                                             | 4-([1,1'-biphenyl]-4-yl)-4-oxobutanoic acid ( <b>3o</b> )                                                 |       |            |            |
| Lit.Ref                                                                                                                                                                                                                                                                                                                                                                                                                                                                                                                                                                                                                                                                                                                                                                                                                                               | A. Ohno, T. Sato, T. Mase, Y. Uozumi, Y. M. A. Yamada, <i>Adv. Synth. Catal.</i> 2020, <b>362</b> , 4687. |       |            |            |
| <div>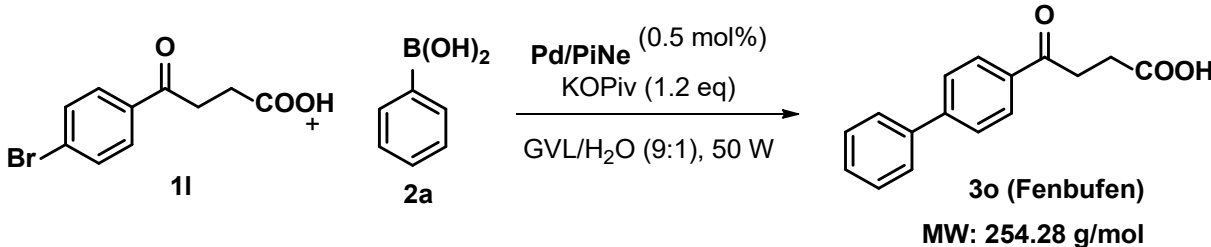</div>                                                                                                                                                                                                                                                                                                                                                                                                                                                                                                                                                                                                                                                                                                                                                         |                                                                                                           |       |            |            |
| <b>Method:</b><br>In a 10 mL microwave vial equipped with a magnetic stirrer, 4-(4-bromophenyl)-4-oxobutanoic acid <b>1I</b> (0.5 mmol, 128 mg), phenylboronic acid <b>2a</b> (1.1 eq, 68.5 mg, 98 % purity), KOiPr (1.2 eq, 88.5 mg, 95% purity), <b>Pd/PiNe</b> (8 wt%, 3.3 mg, 0.5 mol%), and GVL:H <sub>2</sub> O (9:1, 0.5 mL) were consecutively added. The reaction was performed in MW cyclic mode ( <i>T</i> <sub>min</sub> : 90 °C, <i>T</i> <sub>max</sub> : 120 °C, $\mu\lambda$ : 50 W, 40 cycles). After removing the catalyst by filtration and washing with 0.5 mL of GVL, the water was evaporated and the remaining GVL was recovered (94%) by distillation. The product was precipitated with 1 mL of water at 0°C and recovered by filtration. The product <b>3o</b> (Fenbufen) was obtained as white solid (126 mg, 99 % yield). |                                                                                                           |       |            |            |
| Mol Formula                                                                                                                                                                                                                                                                                                                                                                                                                                                                                                                                                                                                                                                                                                                                                                                                                                           | C <sub>16</sub> H <sub>14</sub> O <sub>3</sub>                                                            | m.p.  | 184-186 °C |            |
| <b>Elemental Analysis:</b> calc: C, 75.57; H, 5.55; found: C, 75.62; H, 5.50                                                                                                                                                                                                                                                                                                                                                                                                                                                                                                                                                                                                                                                                                                                                                                          |                                                                                                           |       |            |            |
| <b><sup>1</sup>H NMR</b><br>(400 MHz, DMSO- <i>d</i> <sub>6</sub> )                                                                                                                                                                                                                                                                                                                                                                                                                                                                                                                                                                                                                                                                                                                                                                                   | $\delta$ value:                                                                                           | No. H | Mult       | J value/Hz |
|                                                                                                                                                                                                                                                                                                                                                                                                                                                                                                                                                                                                                                                                                                                                                                                                                                                       | 12.15                                                                                                     | 1     | s          |            |
|                                                                                                                                                                                                                                                                                                                                                                                                                                                                                                                                                                                                                                                                                                                                                                                                                                                       | 8.07                                                                                                      | 2     | d          | 8.2        |
|                                                                                                                                                                                                                                                                                                                                                                                                                                                                                                                                                                                                                                                                                                                                                                                                                                                       | 7.84                                                                                                      | 2     | d          | 8.2        |
|                                                                                                                                                                                                                                                                                                                                                                                                                                                                                                                                                                                                                                                                                                                                                                                                                                                       | 7.75                                                                                                      | 2     | d          | 7.3        |
|                                                                                                                                                                                                                                                                                                                                                                                                                                                                                                                                                                                                                                                                                                                                                                                                                                                       | 7.53-7.49                                                                                                 | 2     | m          |            |
|                                                                                                                                                                                                                                                                                                                                                                                                                                                                                                                                                                                                                                                                                                                                                                                                                                                       | 7.45-7.42                                                                                                 | 1     | m          |            |
|                                                                                                                                                                                                                                                                                                                                                                                                                                                                                                                                                                                                                                                                                                                                                                                                                                                       | 3.29                                                                                                      | 2     | d          | 6.5        |
|                                                                                                                                                                                                                                                                                                                                                                                                                                                                                                                                                                                                                                                                                                                                                                                                                                                       | 2.60                                                                                                      | 2     | d          | 6.5        |
| <b><sup>13</sup>C NMR (100.6 Hz, DMSO-<i>d</i><sub>6</sub>)</b> $\delta$ : 198.0, 173.8, 144.5, 138.9, 135.3, 129.1, 128.6, 128.4, 127.0, 126.9, 33.1, 27.9                                                                                                                                                                                                                                                                                                                                                                                                                                                                                                                                                                                                                                                                                           |                                                                                                           |       |            |            |
| <b>GC-EIMS (m/z, %):</b> 237 (10), 182 (15), 181 (100), 153 (23), 152 (43), 151 (12)                                                                                                                                                                                                                                                                                                                                                                                                                                                                                                                                                                                                                                                                                                                                                                  |                                                                                                           |       |            |            |

## 5. $^1\text{H}$ $^{13}\text{C}$ and $^{19}\text{F}$ NMR spectra

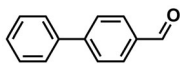

[1,1'-biphenyl]-4-carbaldehyde (**3a**)

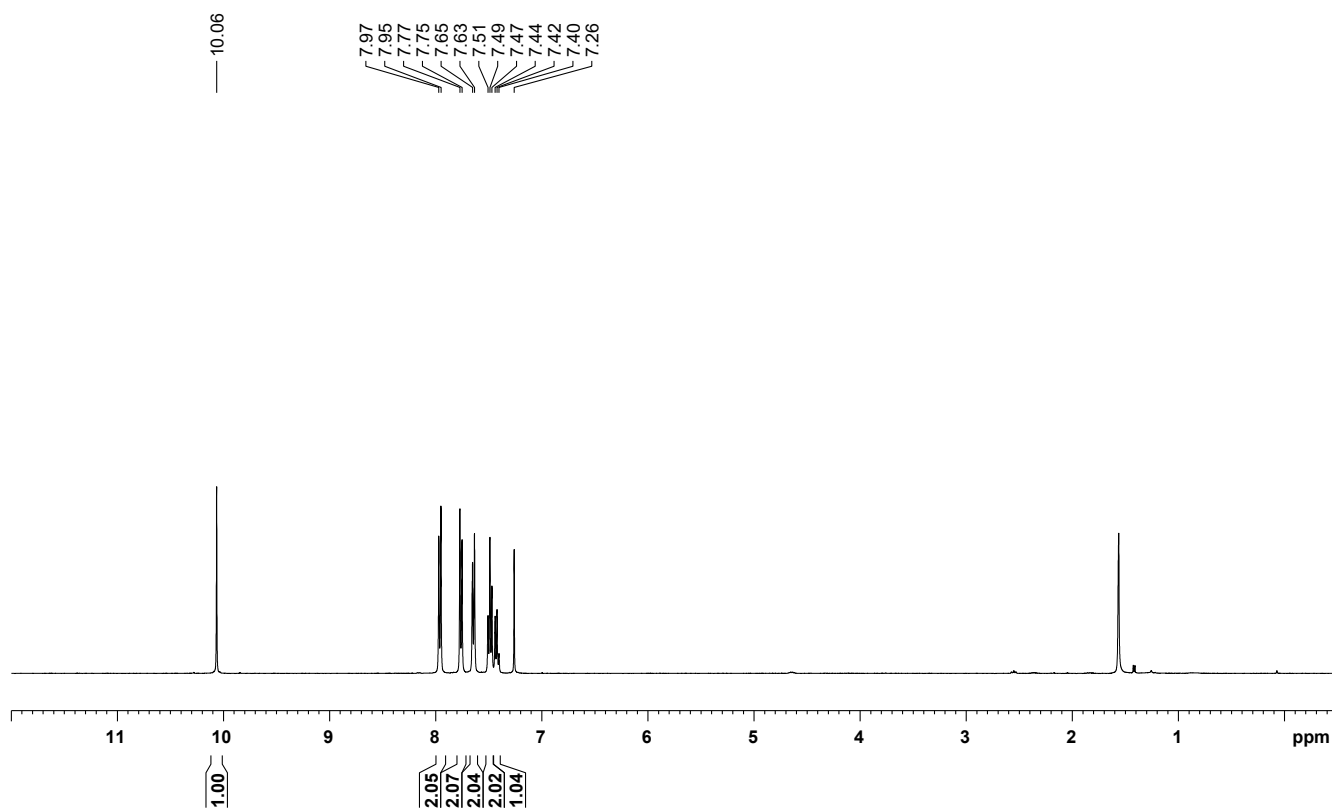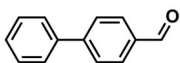

[1,1'-biphenyl]-4-carbaldehyde (**3a**)

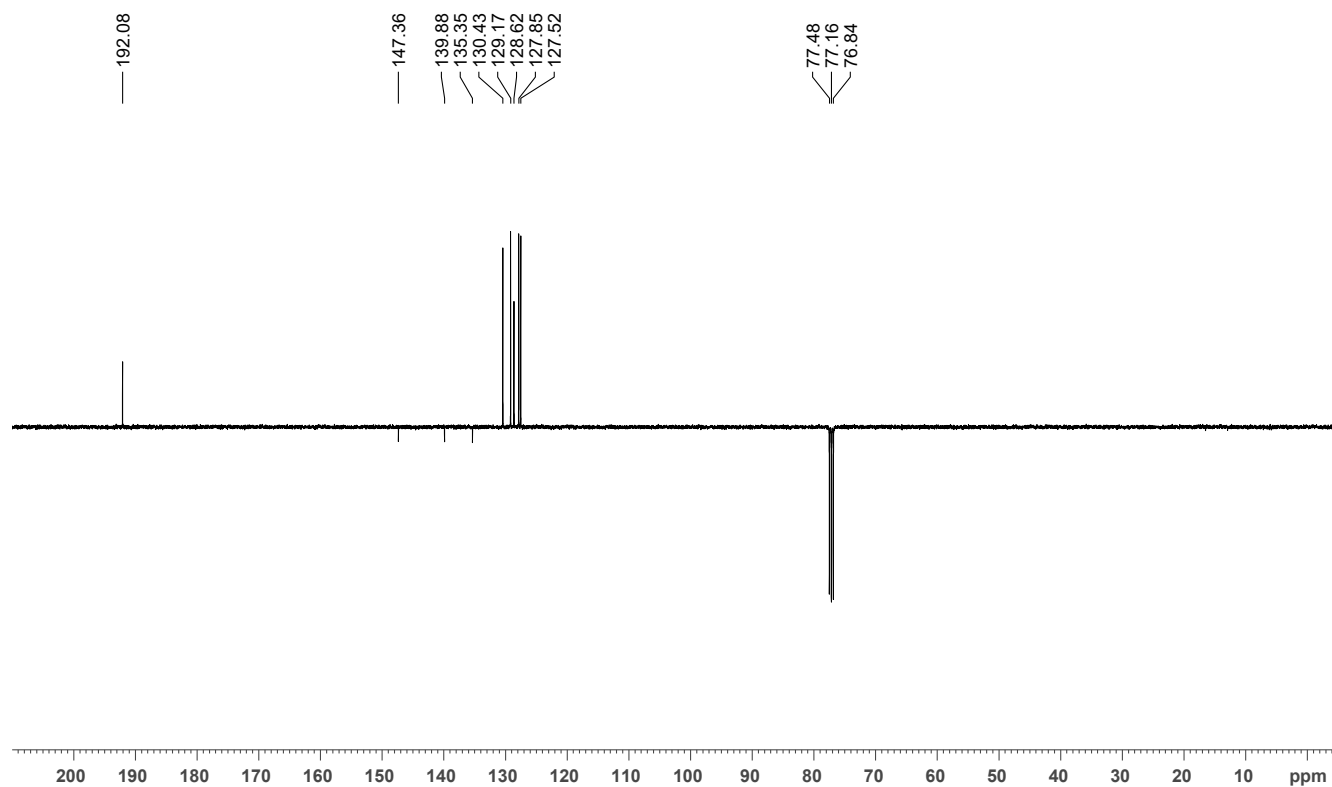

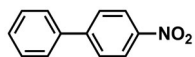

4-nitro-1,1'-biphenyl (**3b**)

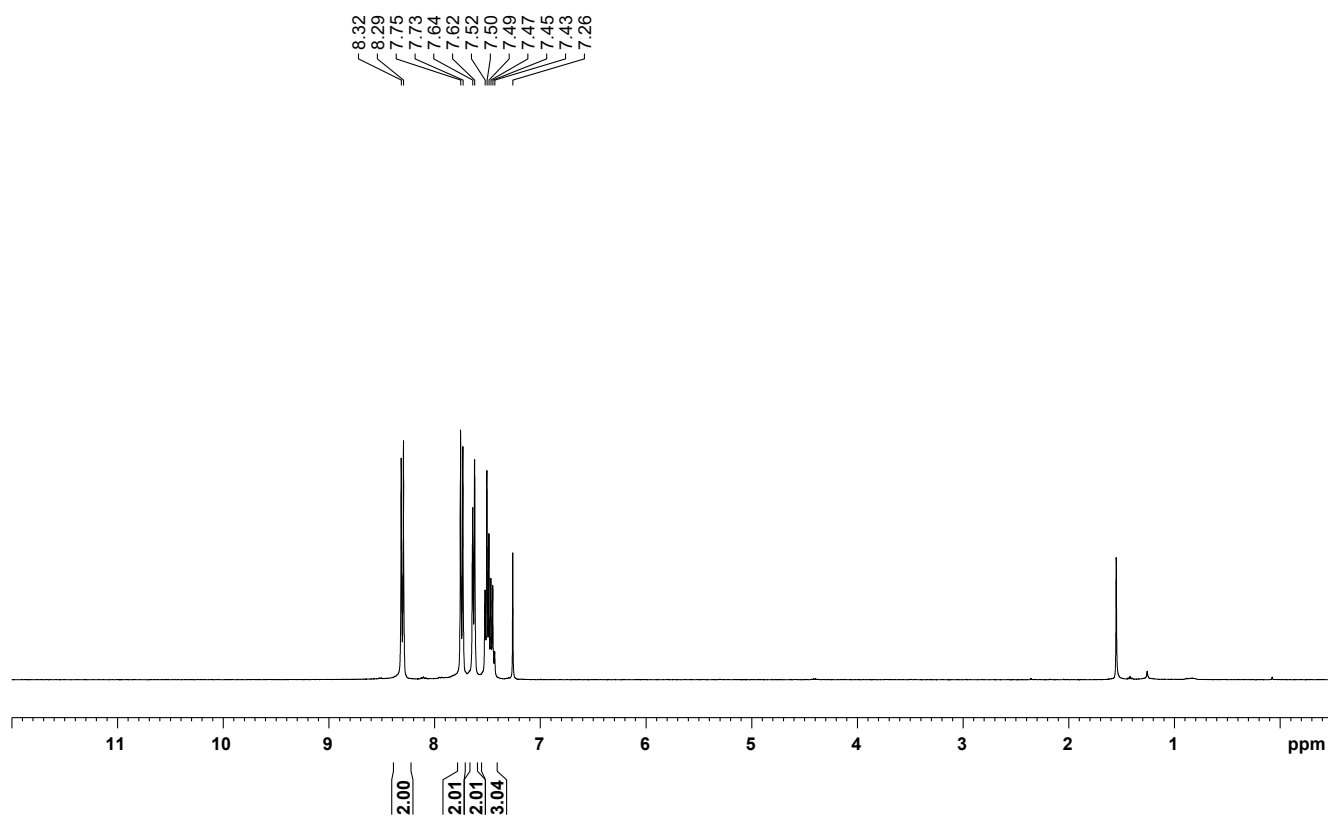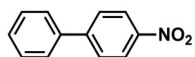

4-nitro-1,1'-biphenyl (**3b**)

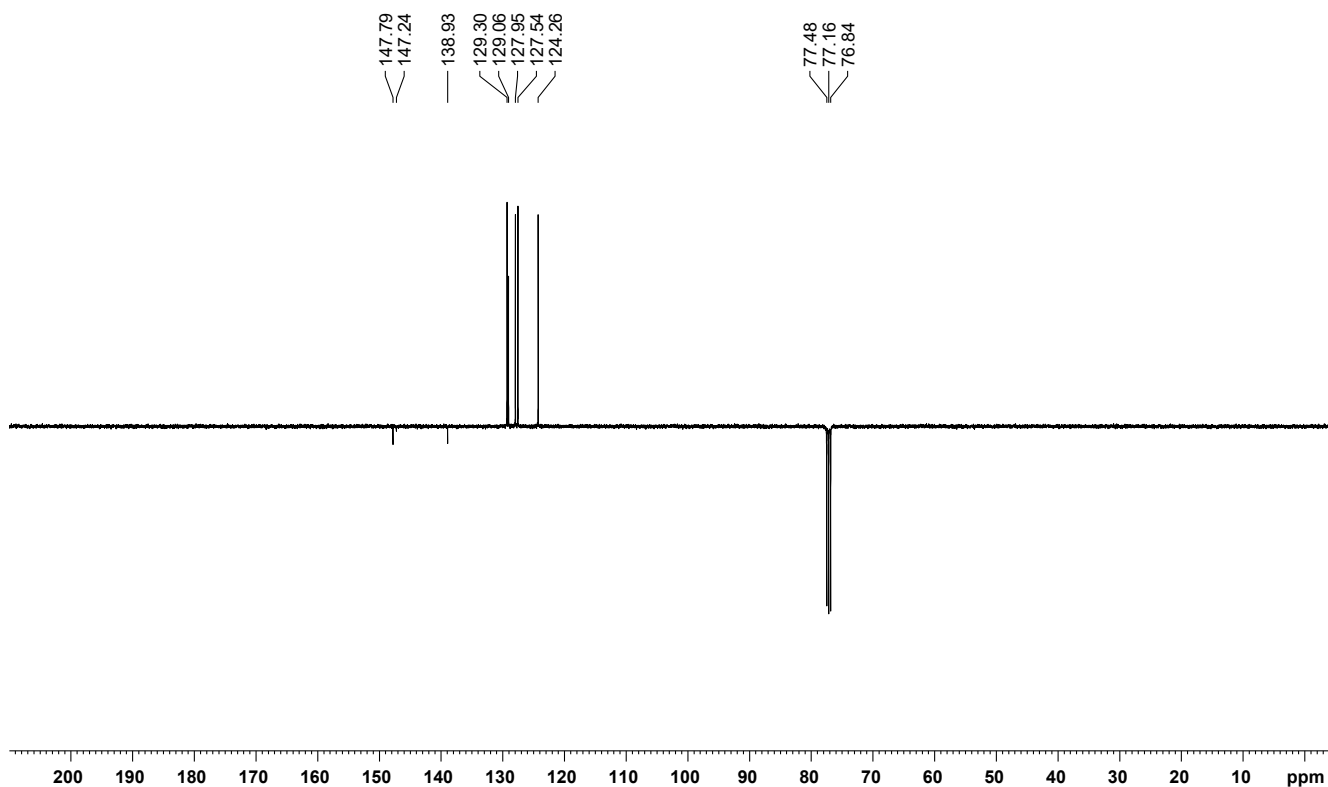



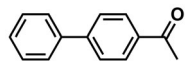

1-([1,1'-biphenyl]-4-yl)ethanone (**3c**)

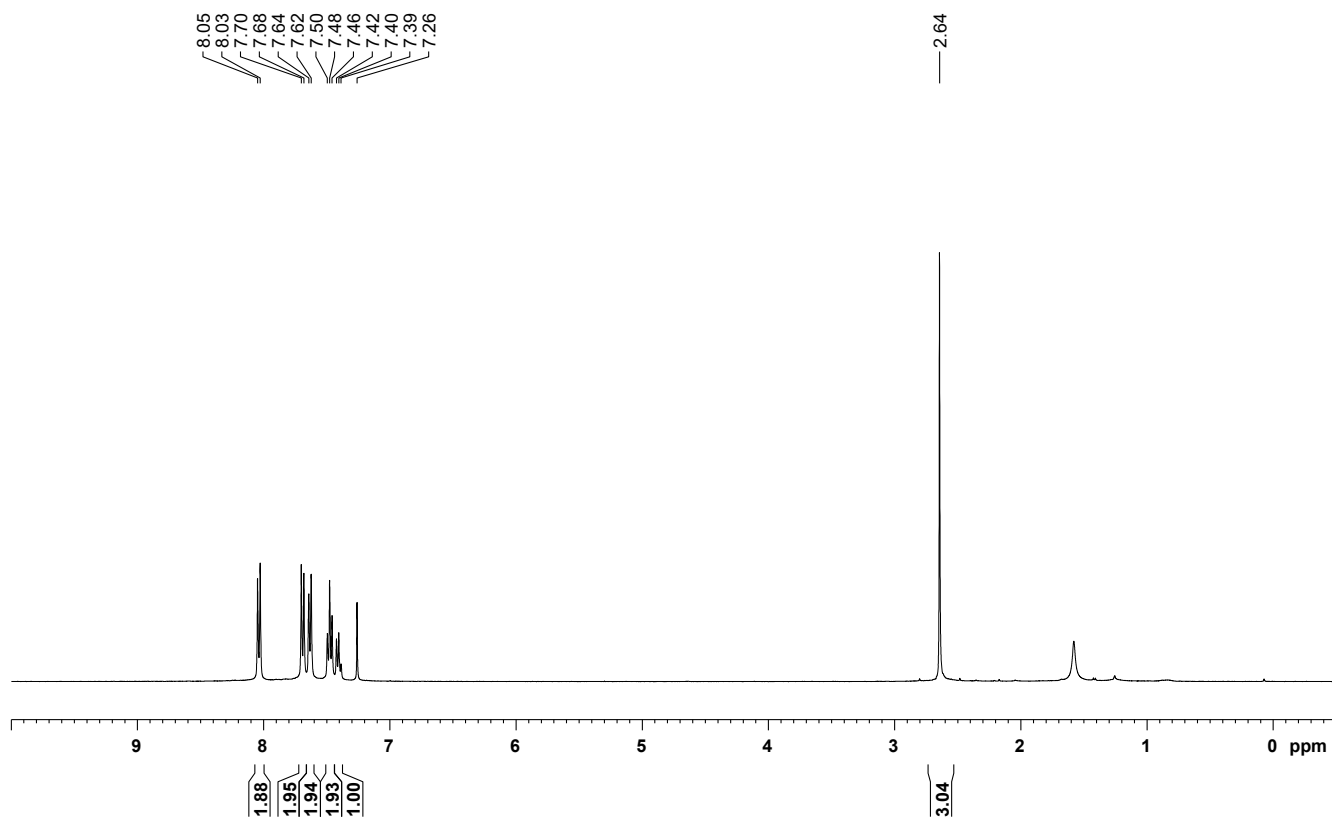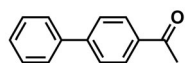

1-([1,1'-biphenyl]-4-yl)ethanone (**3c**)

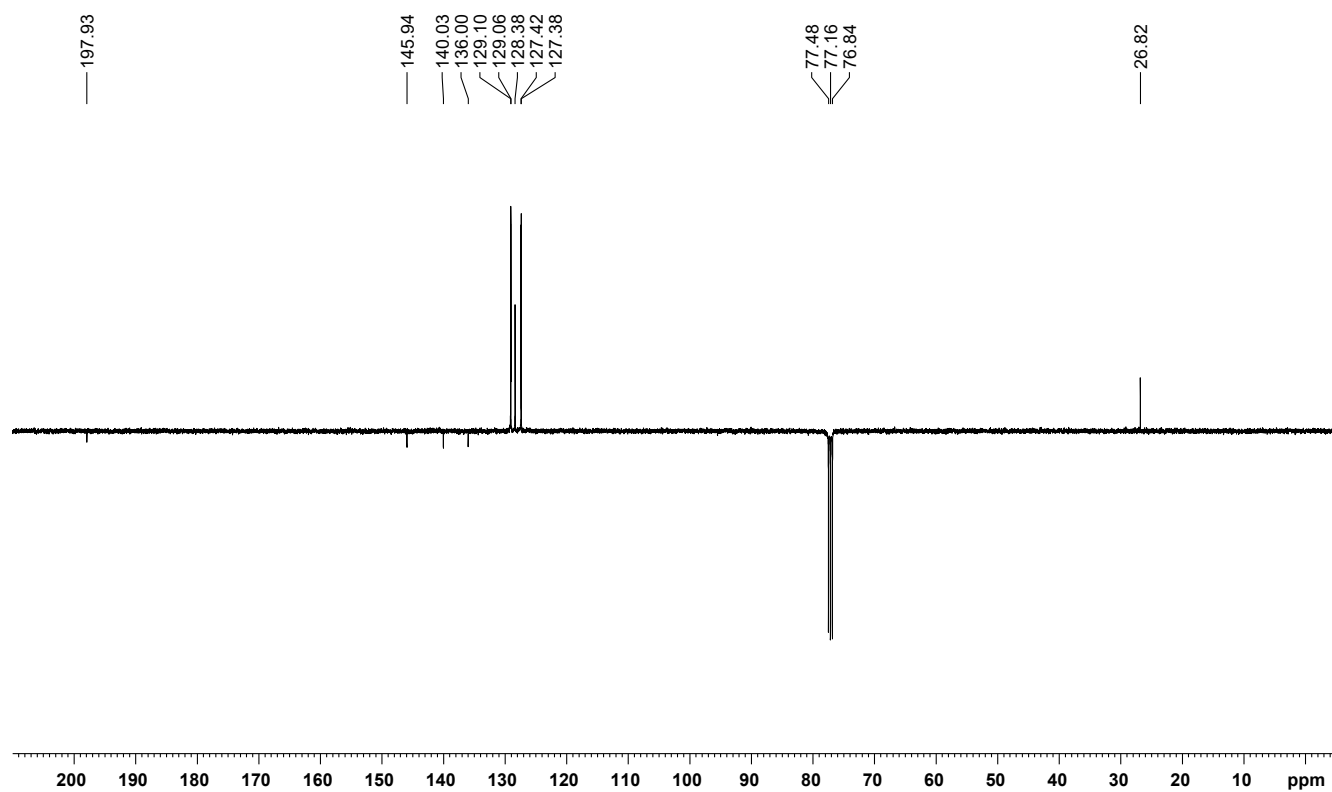

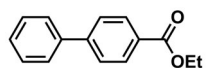

ethyl [1,1'-biphenyl]-4-carboxylate (**3d**)

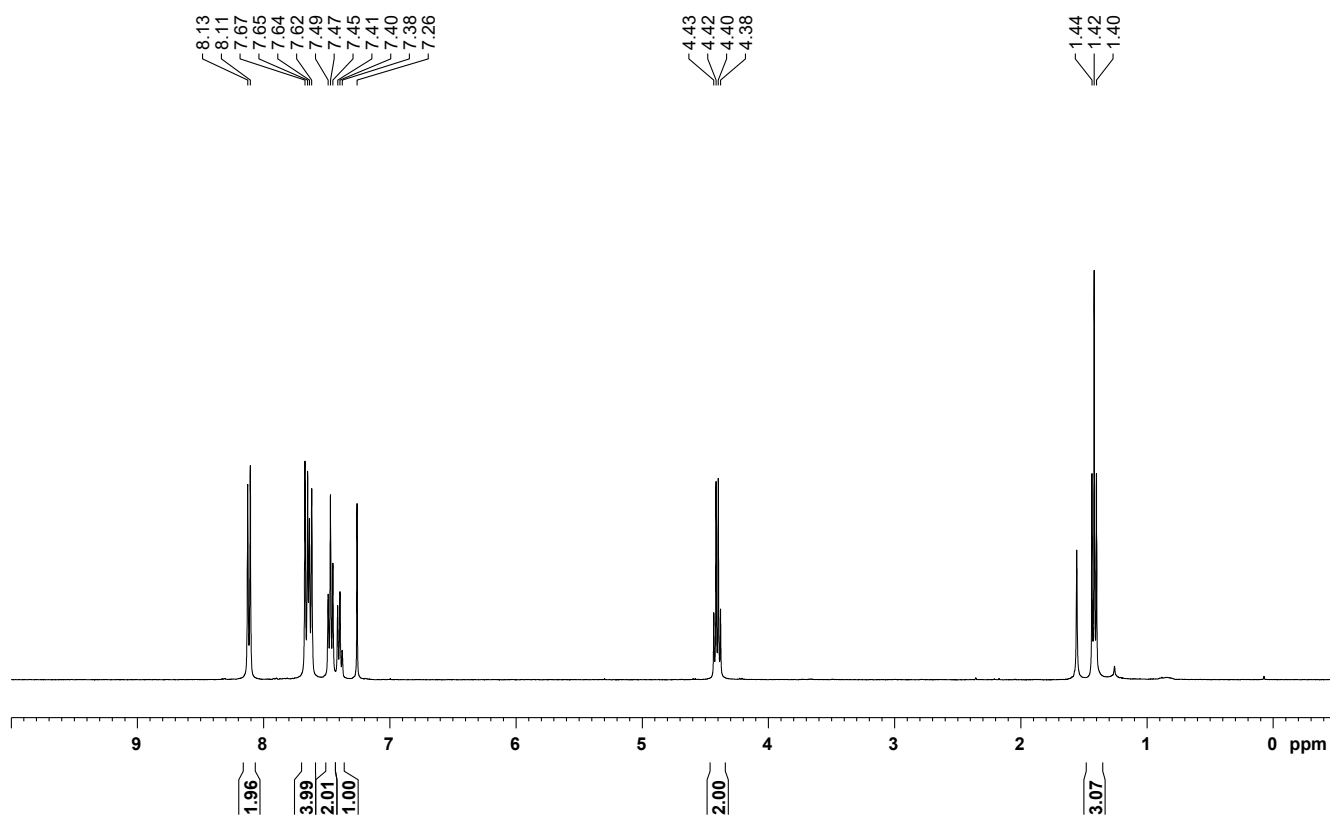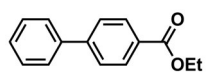

ethyl [1,1'-biphenyl]-4-carboxylate (**3d**)

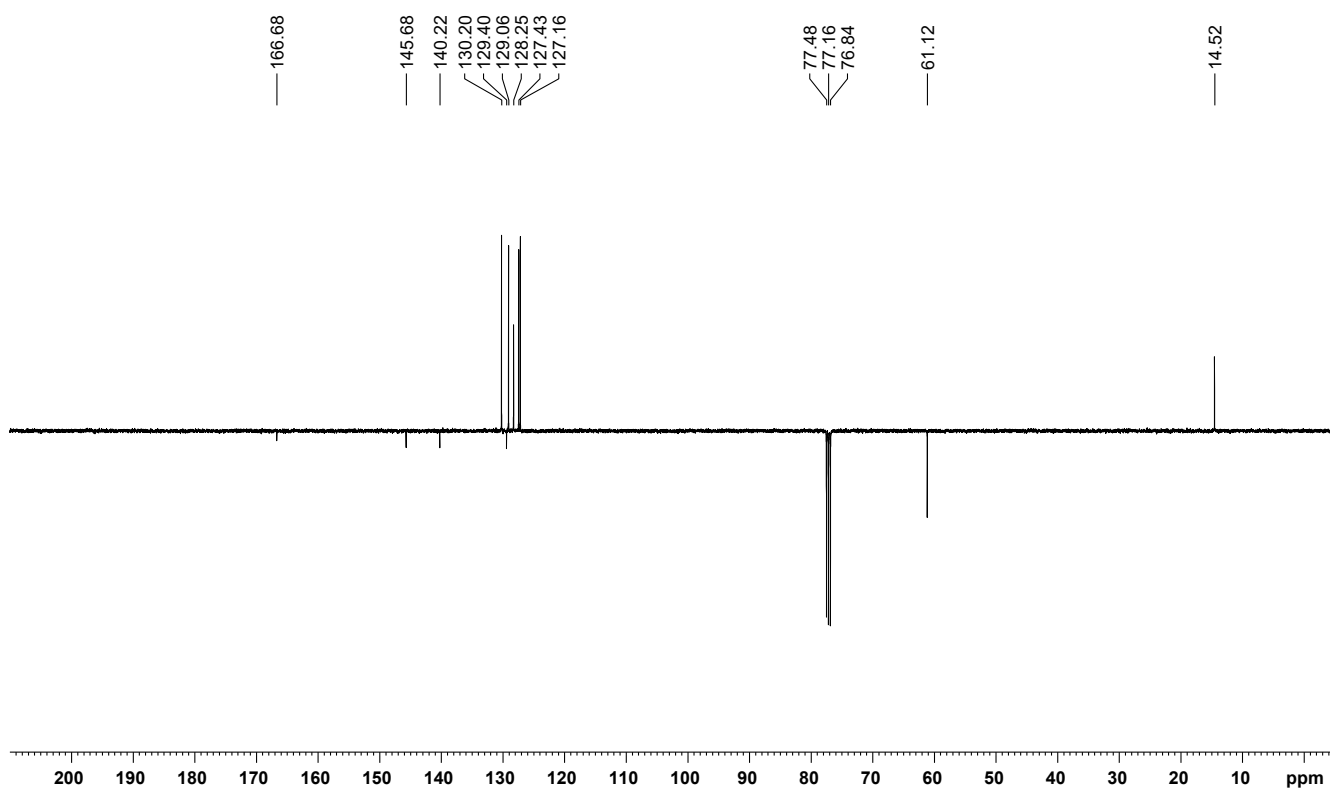

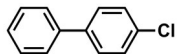

4-chloro-1,1'-biphenyl (**3e**)

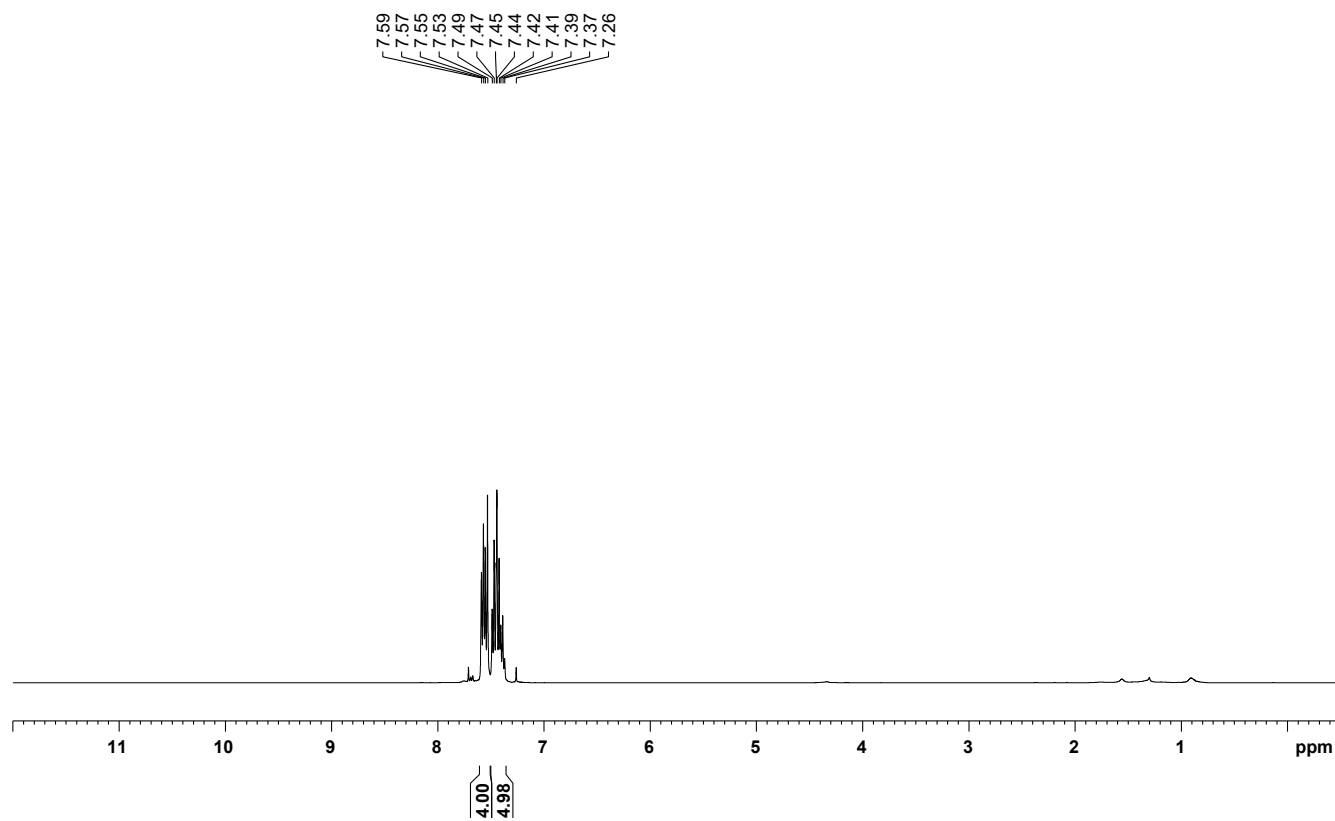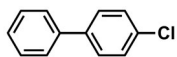

4-chloro-1,1'-biphenyl (**3e**)

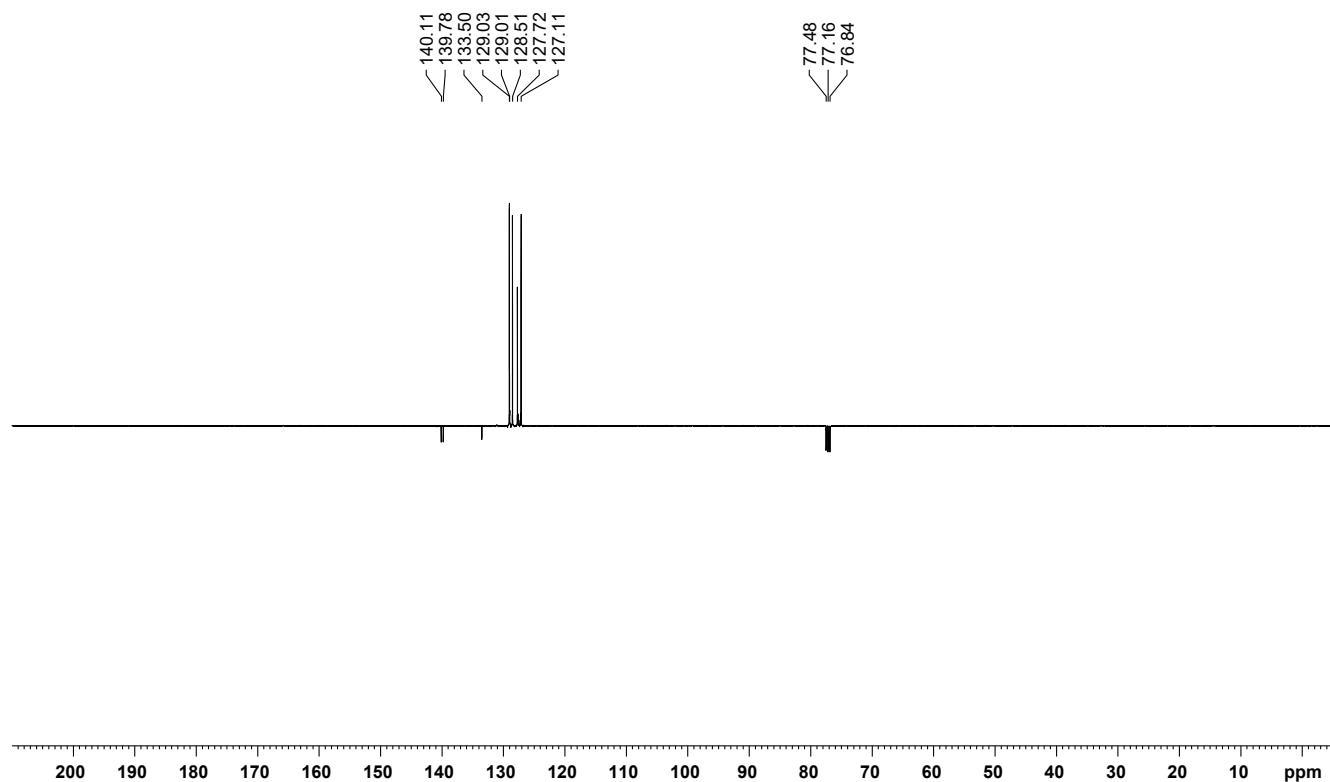

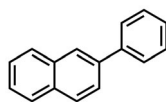

2-phenylnaphthalene (3f)

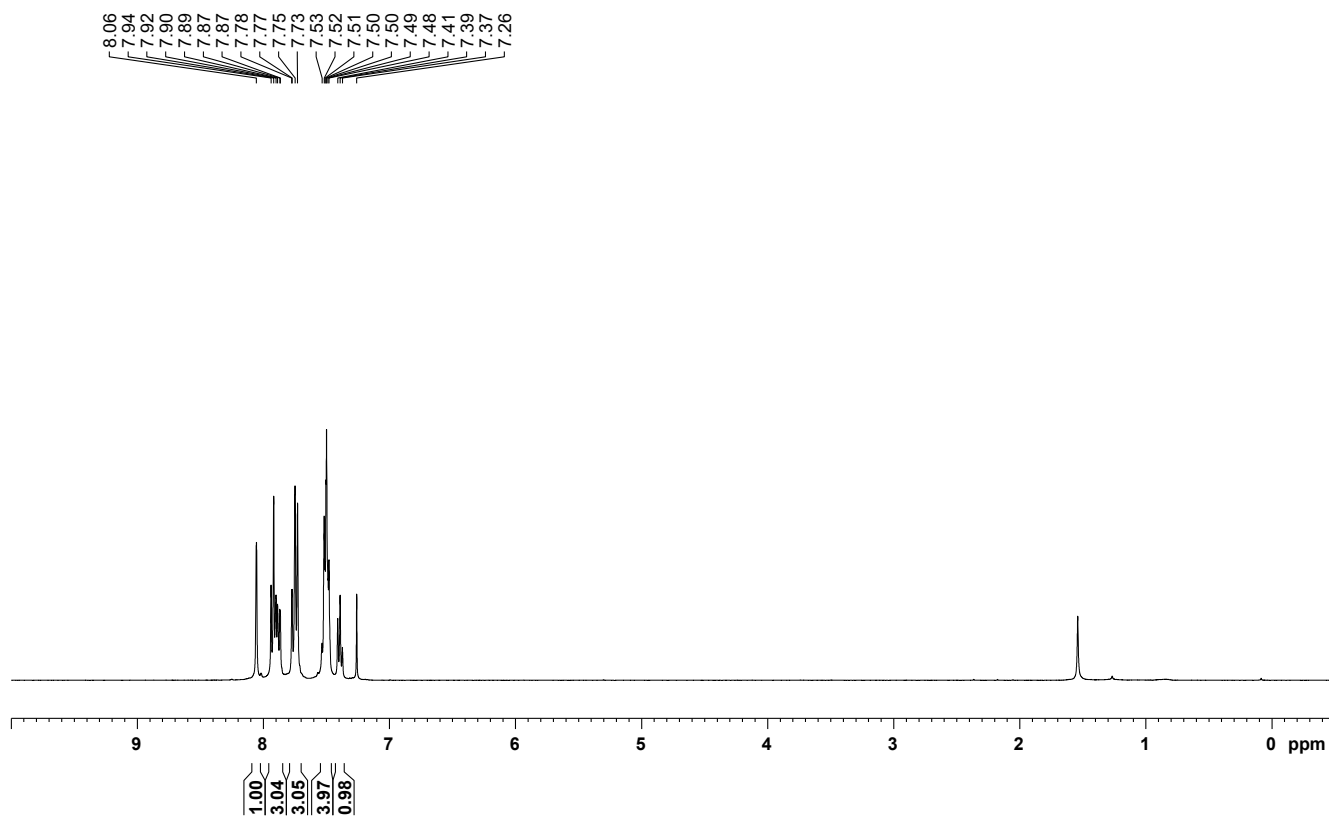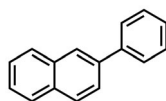

2-phenylnaphthalene (3f)

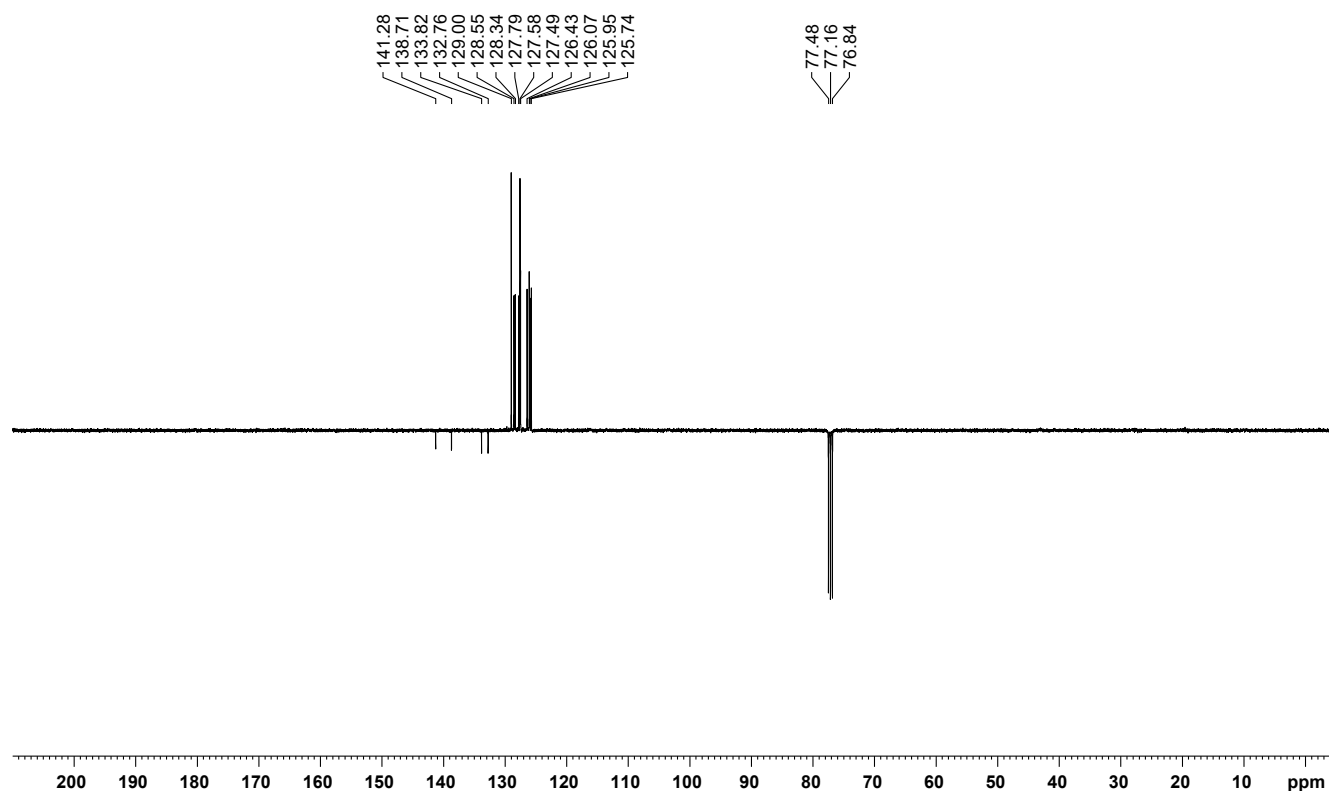

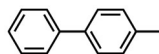

4-methyl-1,1'-biphenyl (**3g**)

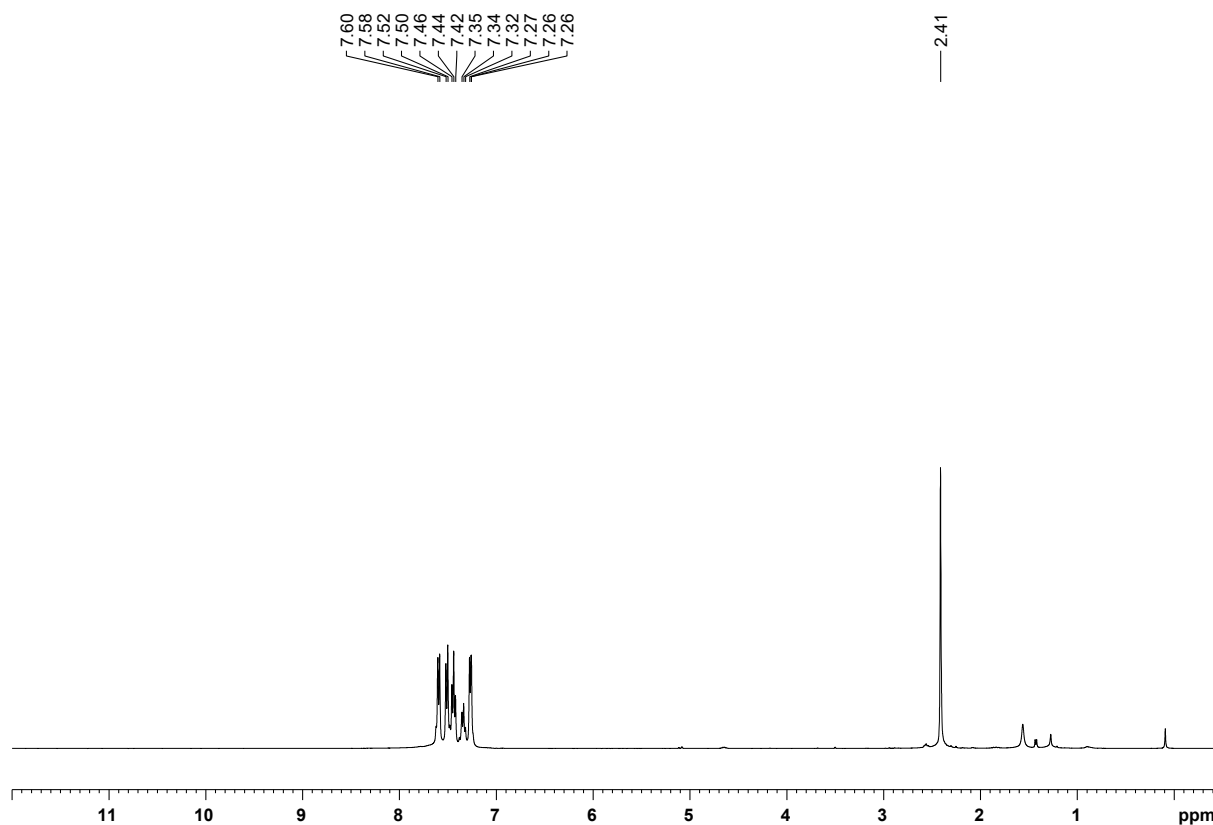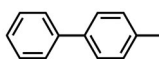

4-methyl-1,1'-biphenyl (**3g**)

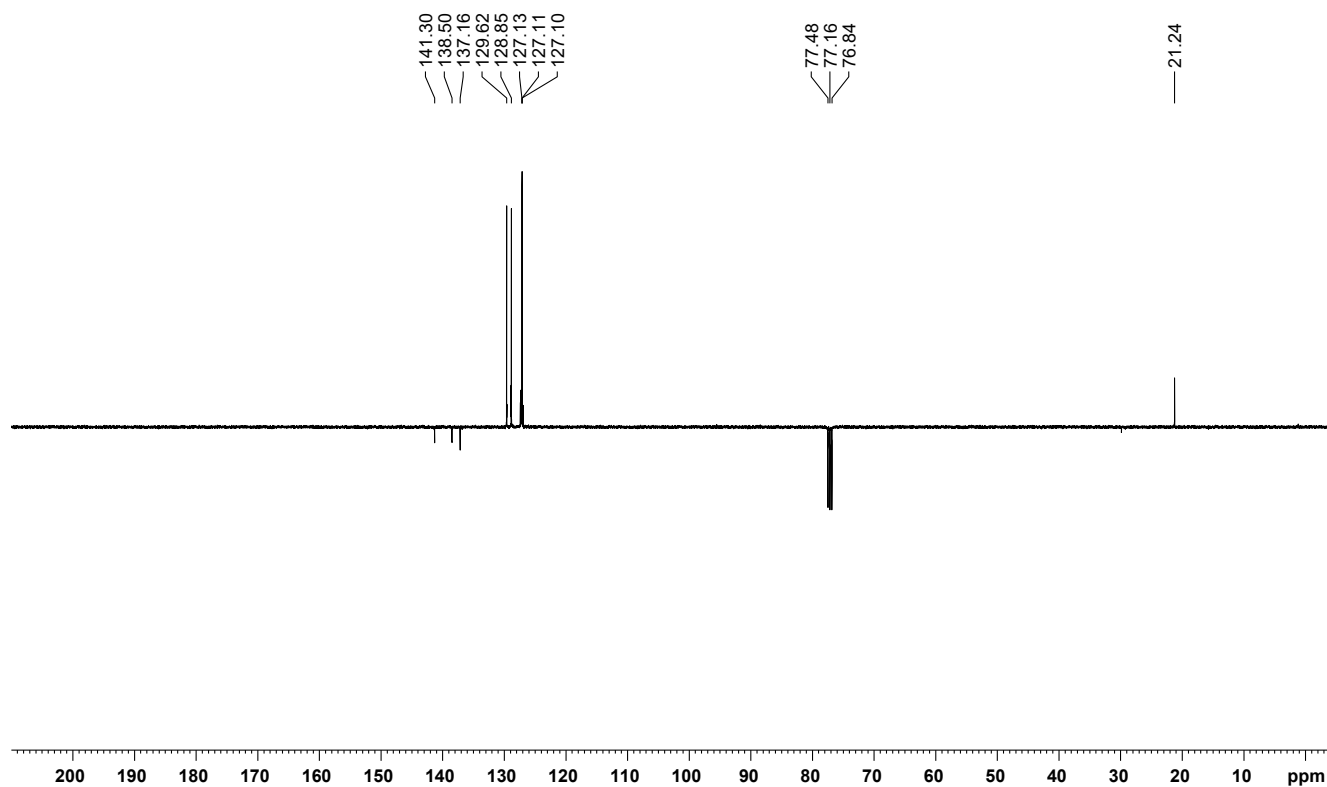

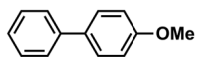

4-methoxy-1,1'-biphenyl (**3h**)

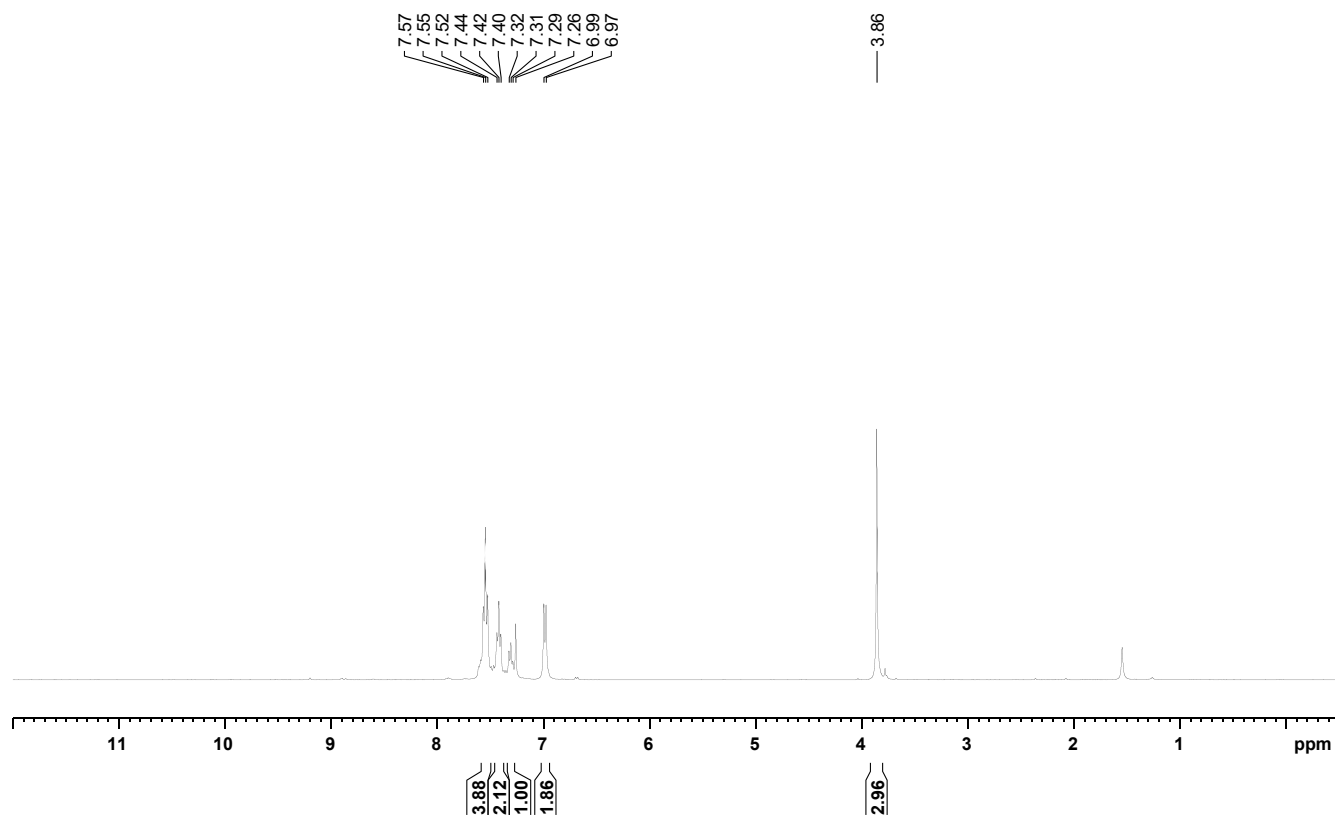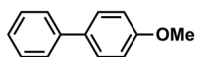

4-methoxy-1,1'-biphenyl (**3h**)

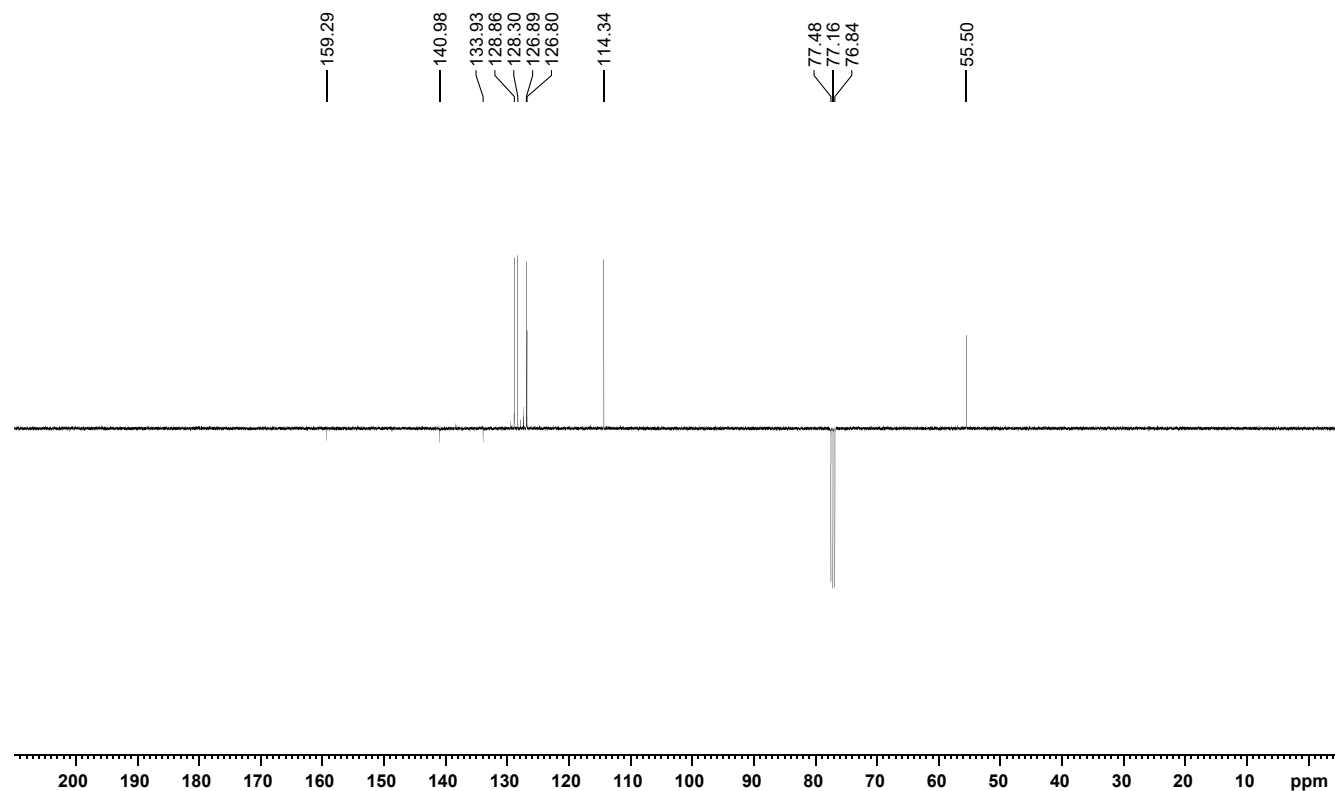

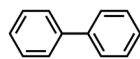

1,1'-biphenyl (**3i**)

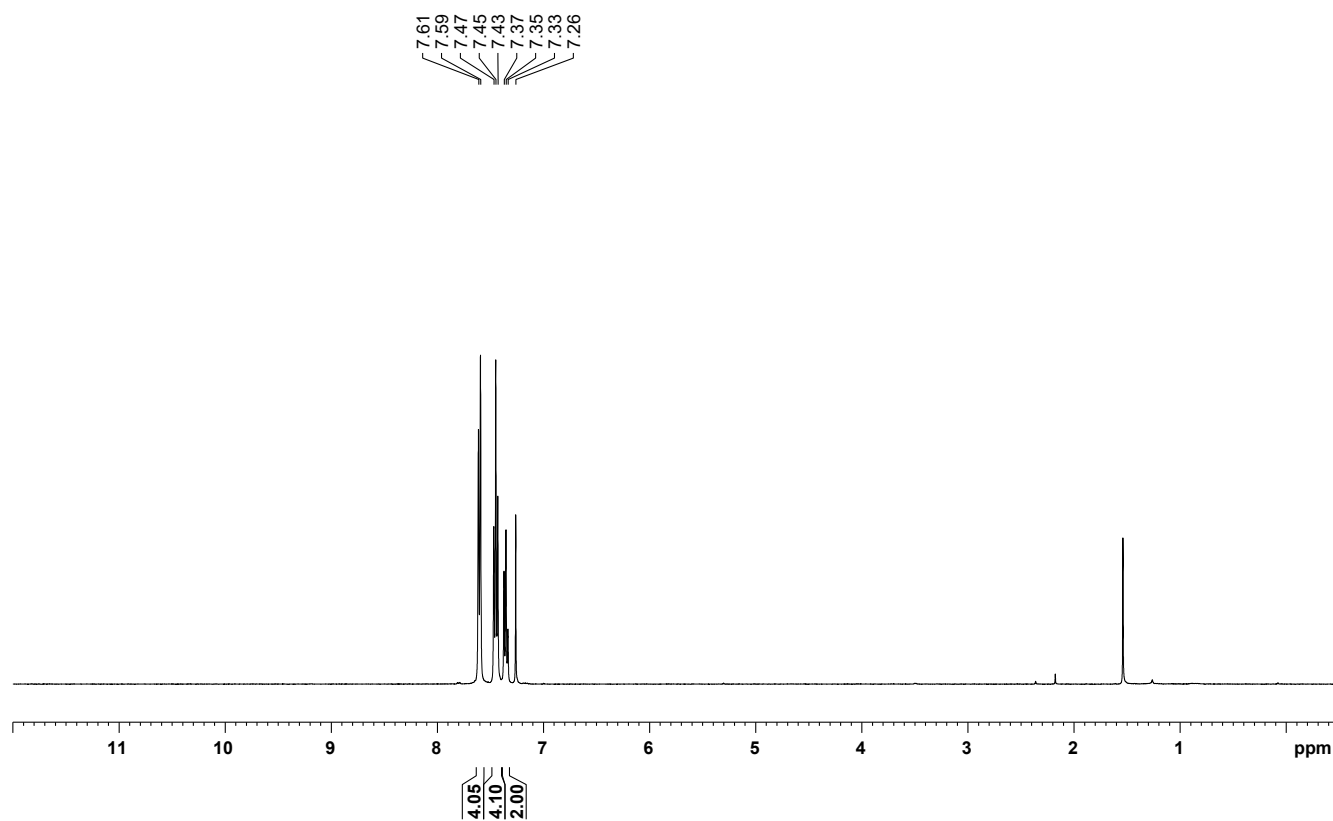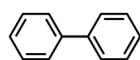

1,1'-biphenyl (**3i**)

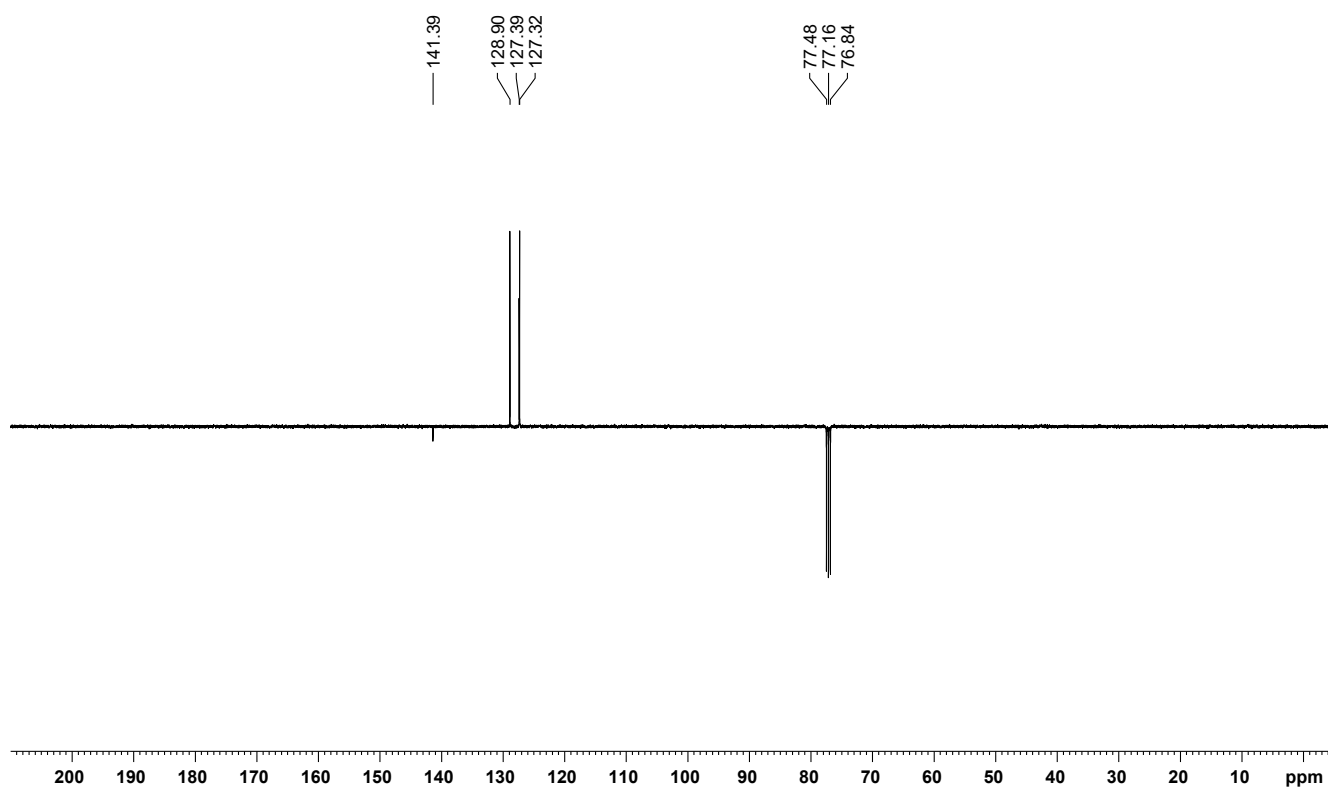

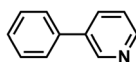

3-phenylpyridine (**3j**)

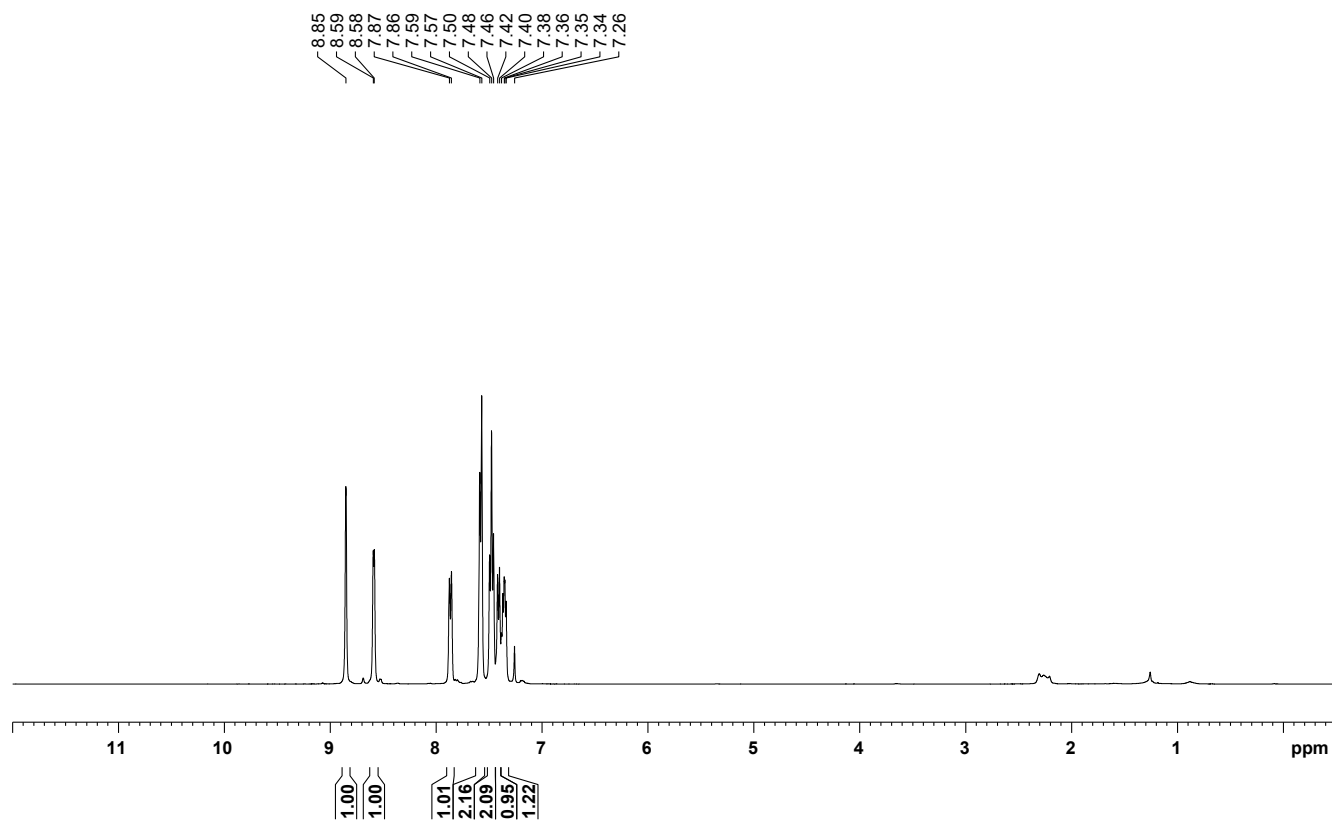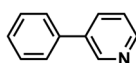

3-phenylpyridine (**3j**)

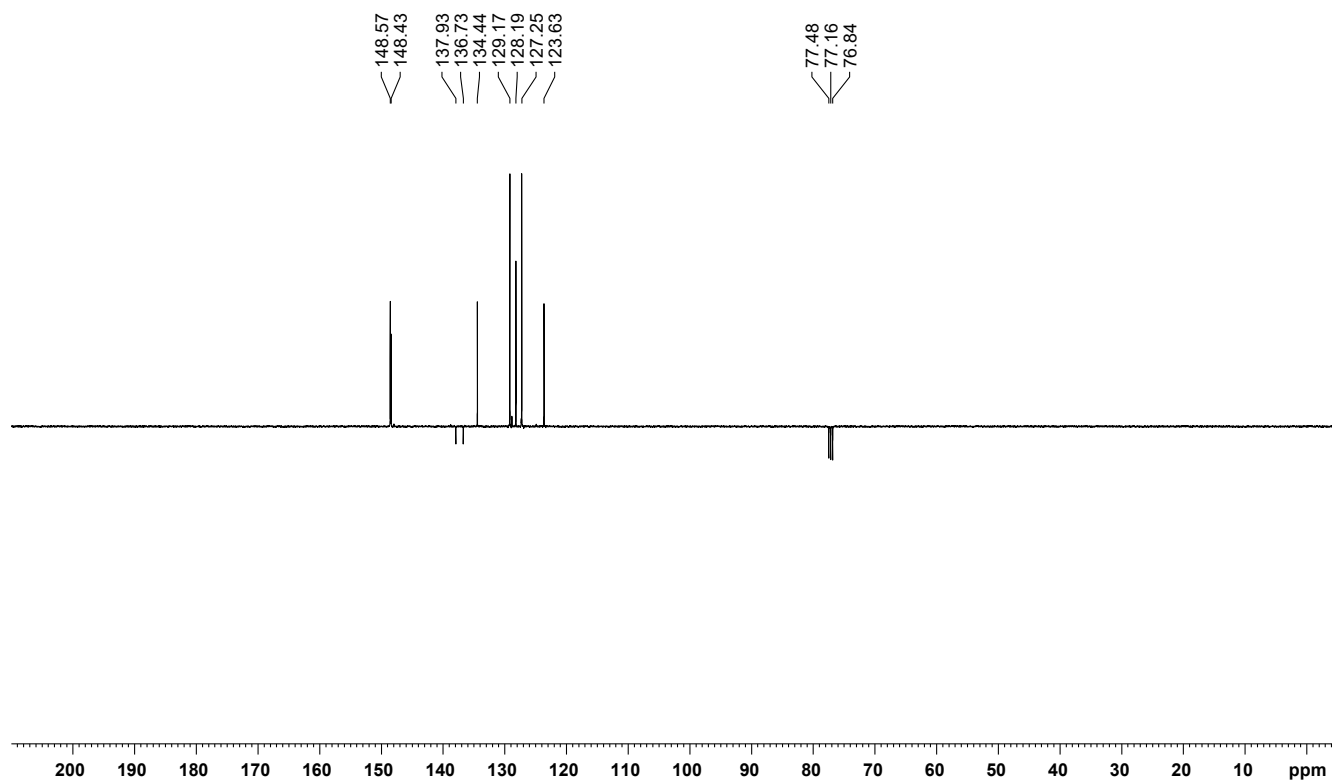



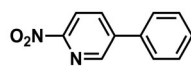

2-nitro-4-phenylpyridine (**3k**)

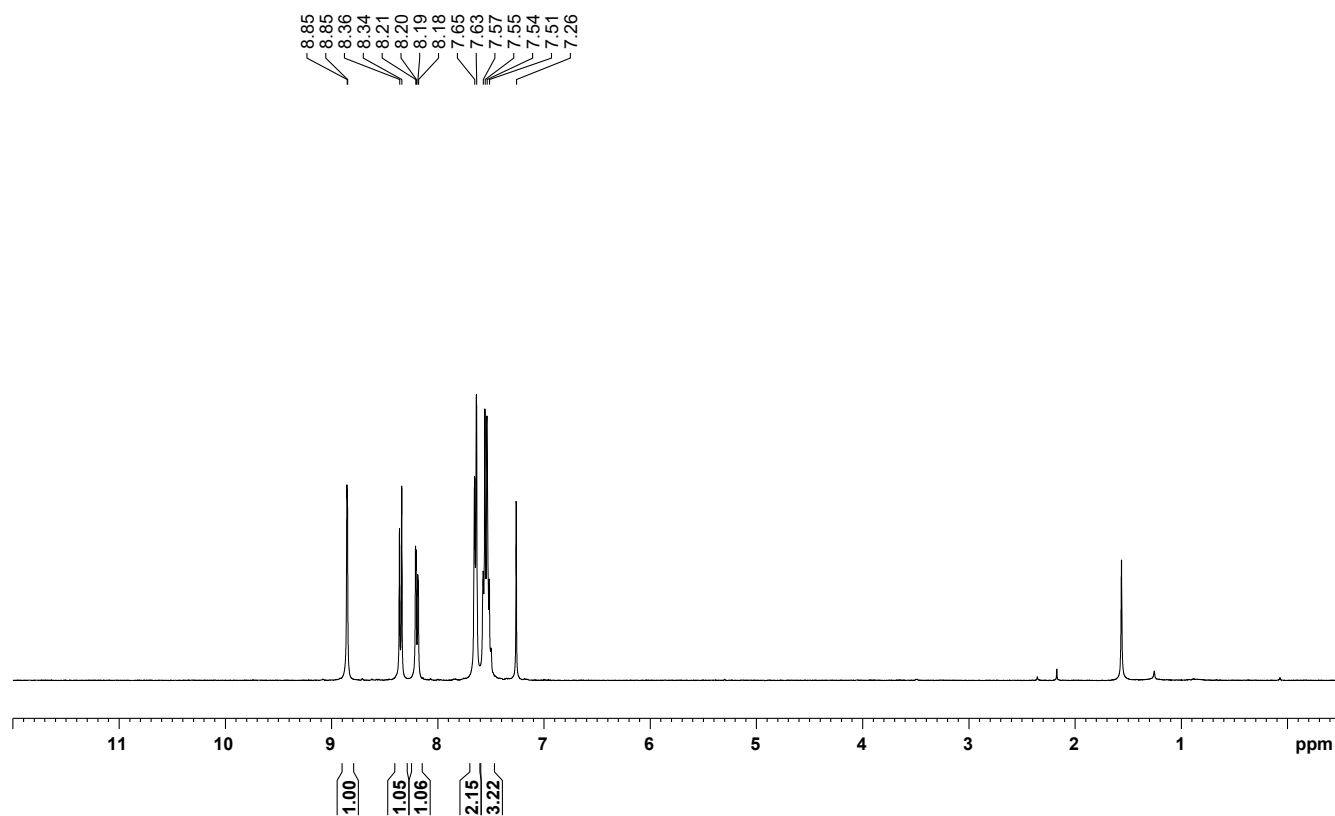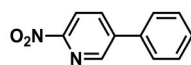

2-nitro-4-phenylpyridine (**3k**)

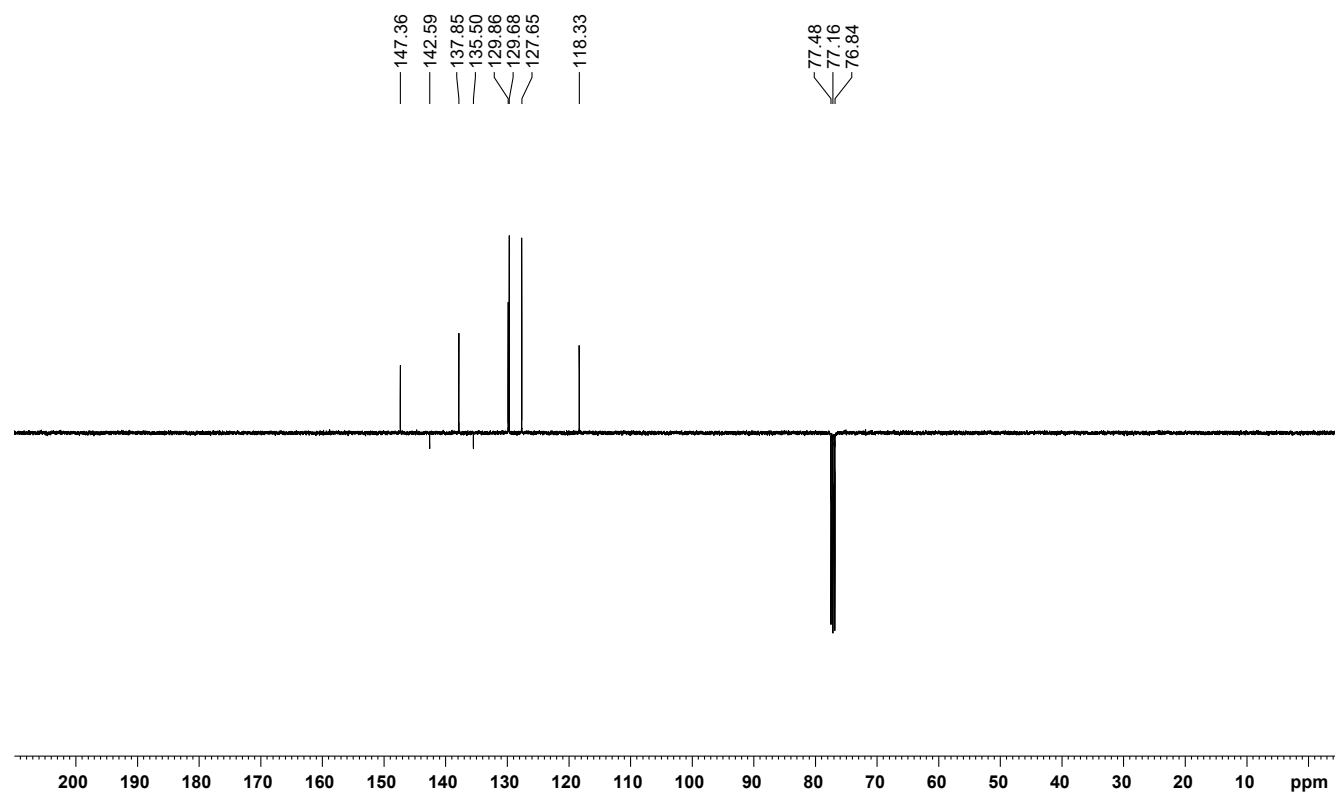

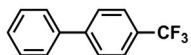

4-(trifluoromethyl)-1,1'-biphenyl (**31**)

7.75  
7.73  
7.70  
7.61  
7.59  
7.50  
7.48  
7.46  
7.43  
7.41  
7.39  
7.26

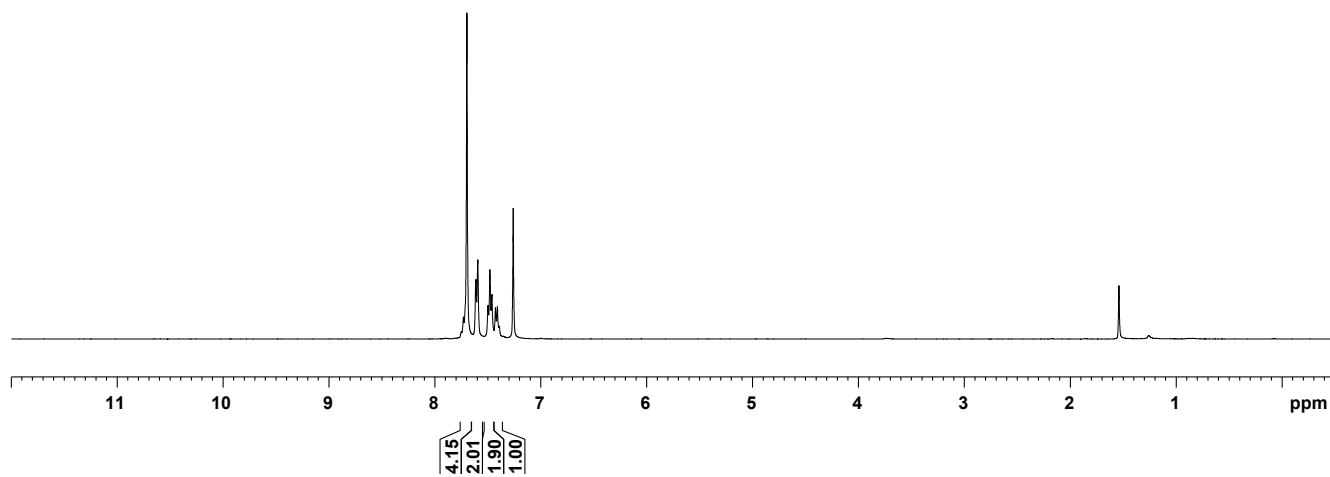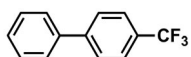

4-(trifluoromethyl)-1,1'-biphenyl (**31**)

-62.40

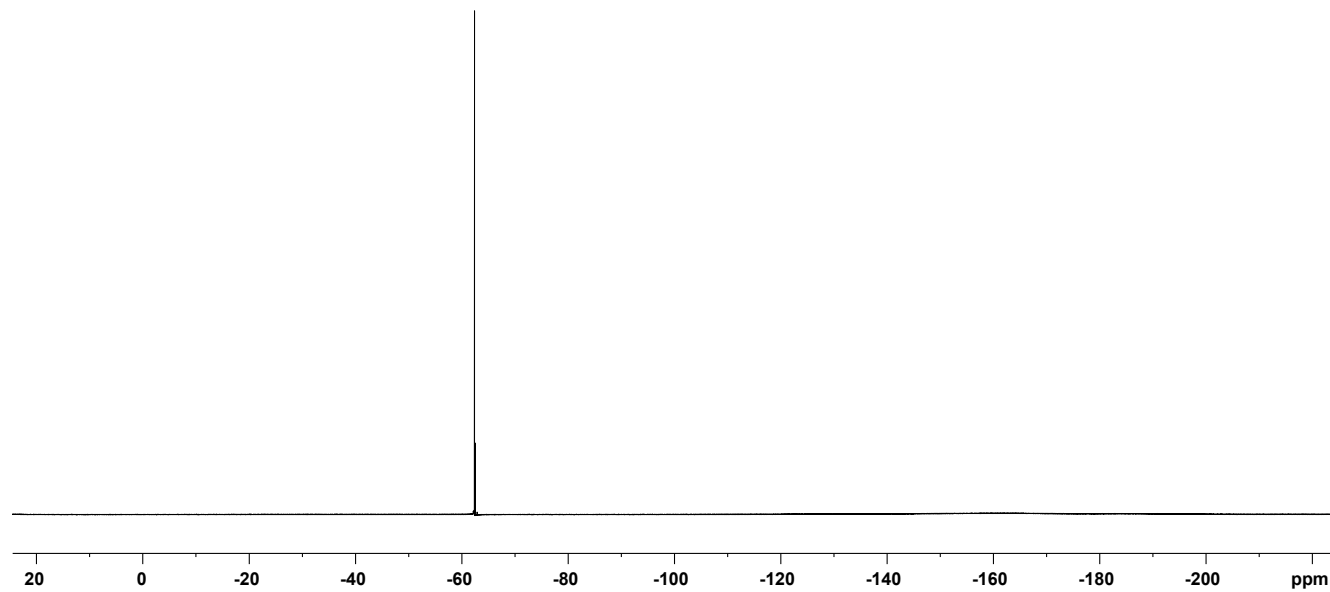



4-(trifluoromethyl)-1,1'-biphenyl (**3l**)

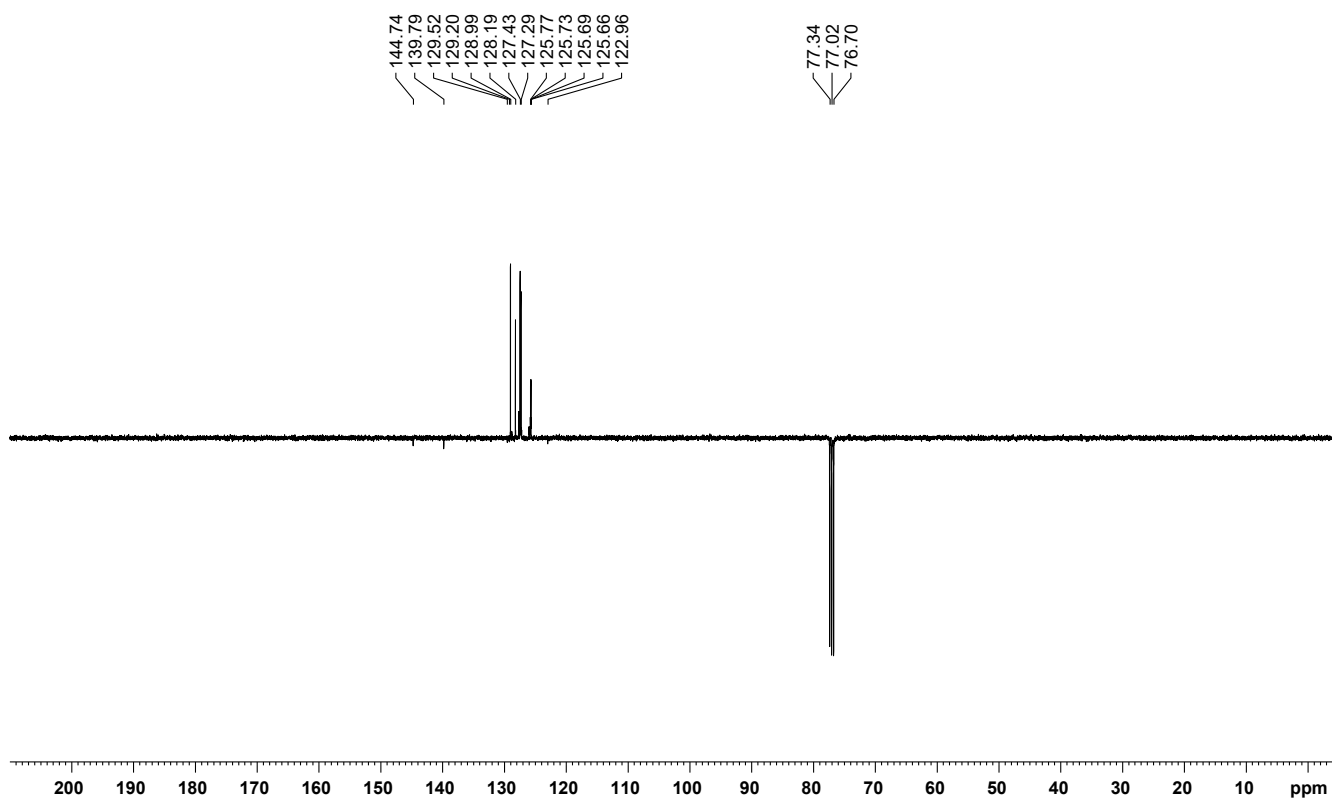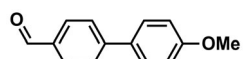

4'-methoxy-[1,1'-biphenyl]-4-carbaldehyde (**3m**)

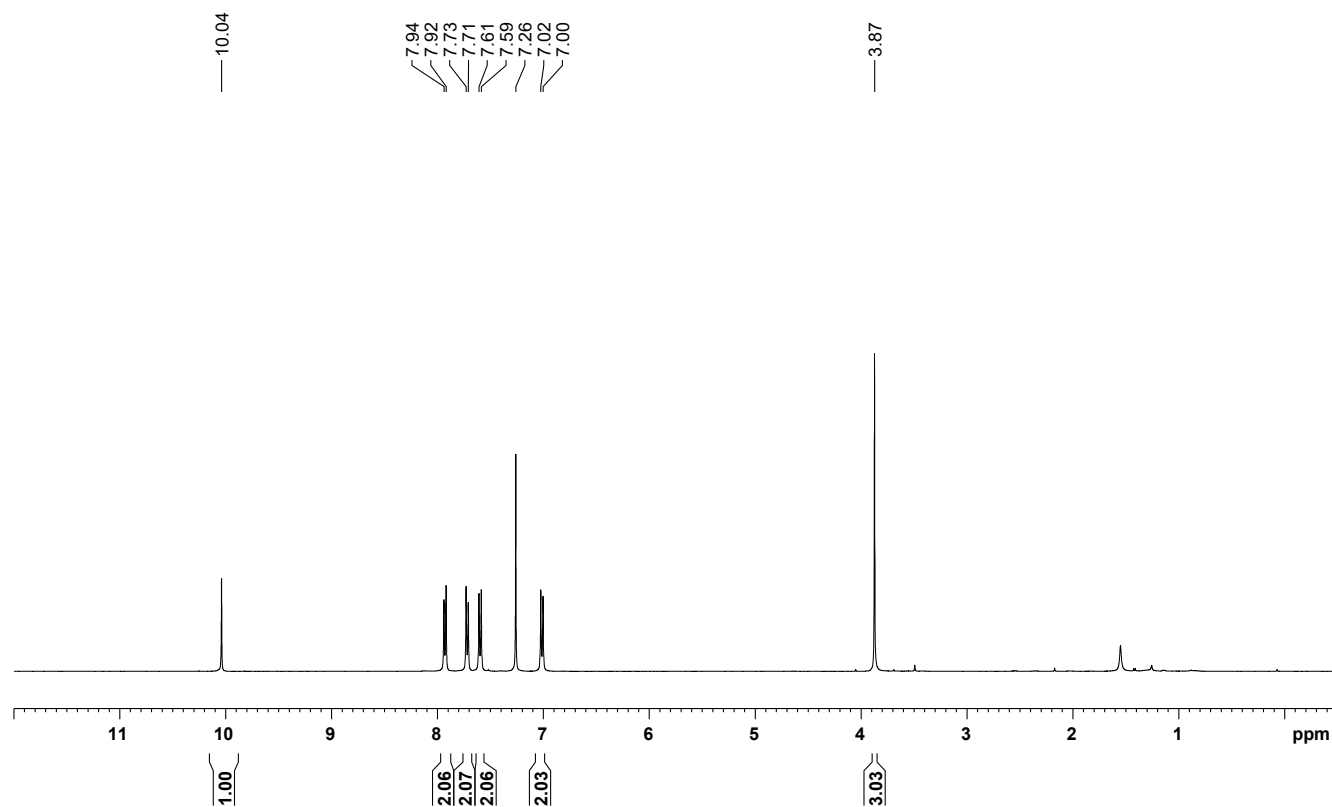

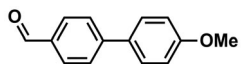

4'-methoxy-[1,1'-biphenyl]-4-carbaldehyde (**3m**)

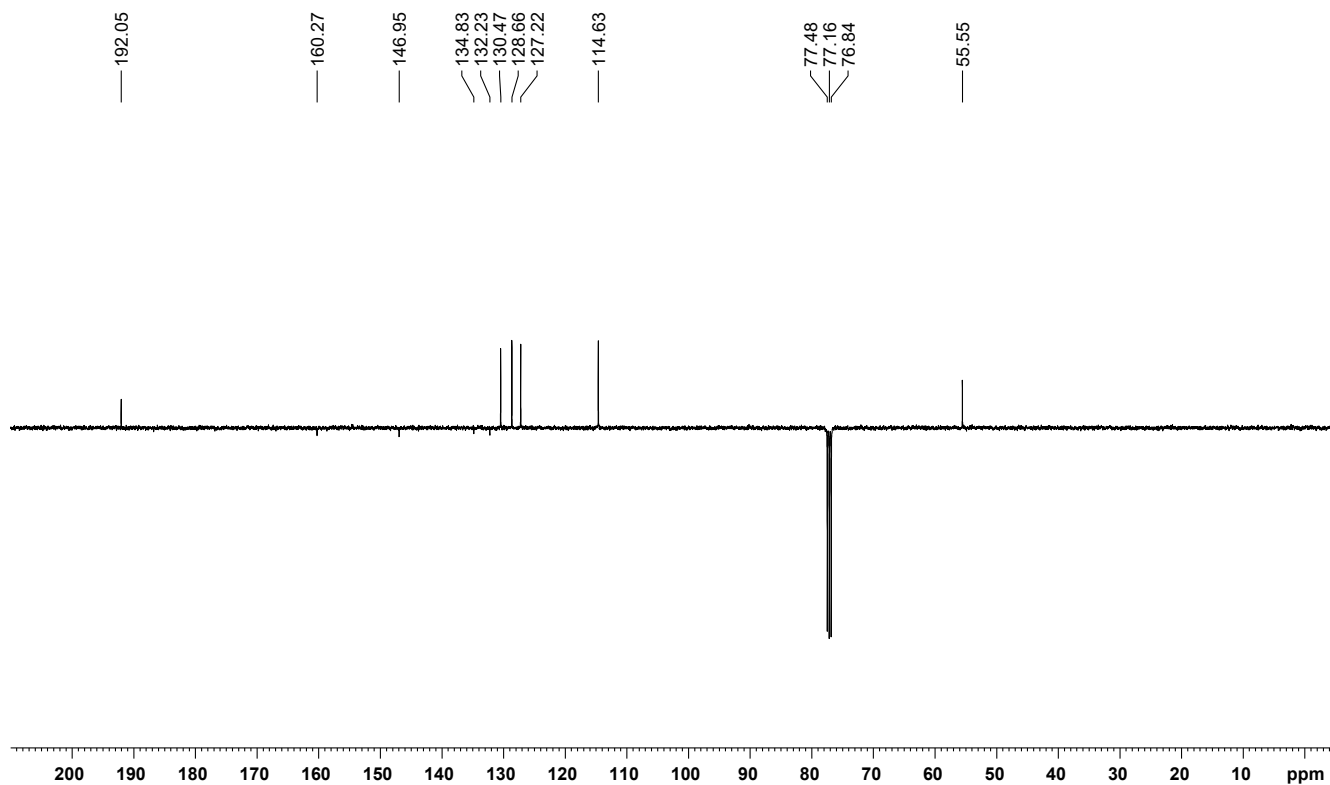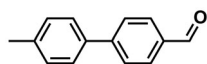

4'-methyl-[1,1'-biphenyl]-4-carbaldehyde (**3n**)

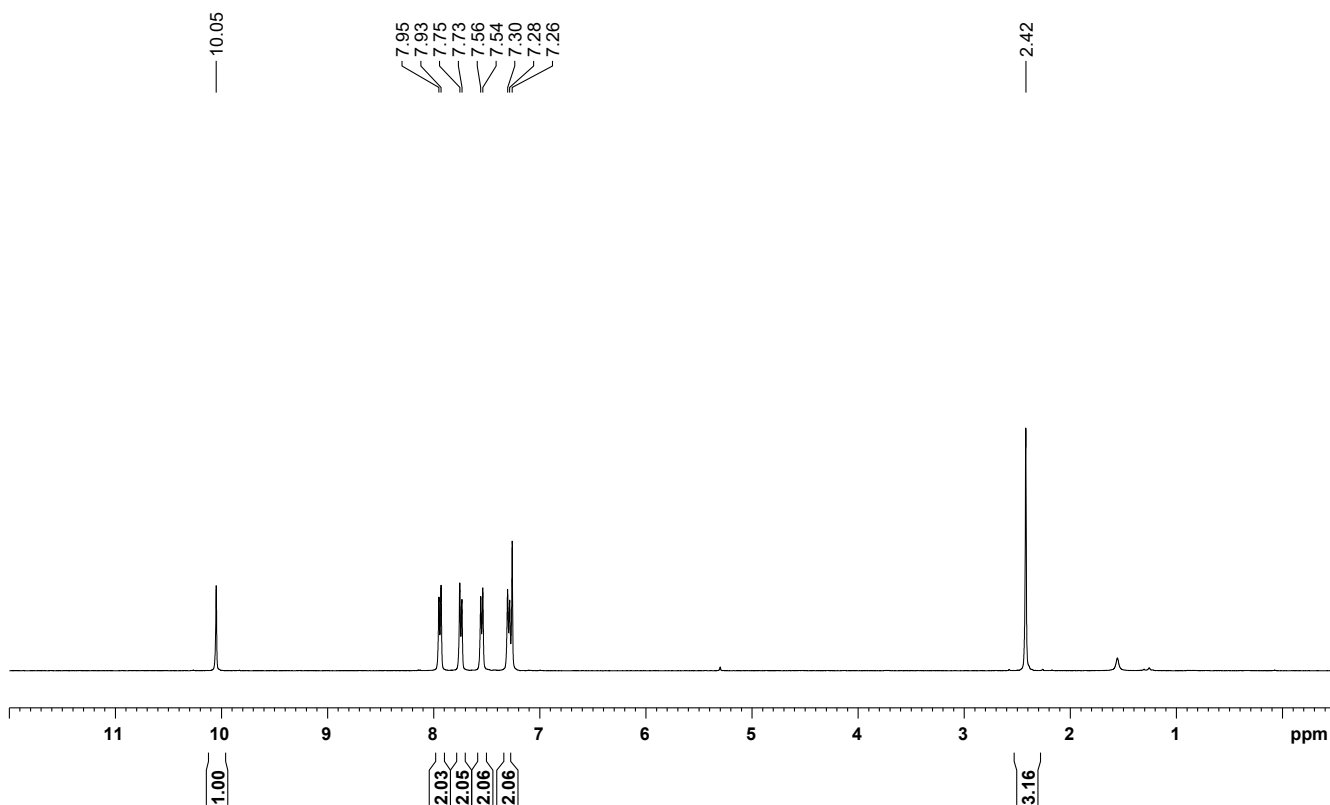

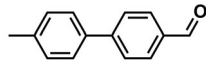

4'-methyl-[1,1'-biphenyl]-4-carbaldehyde (**3n**)

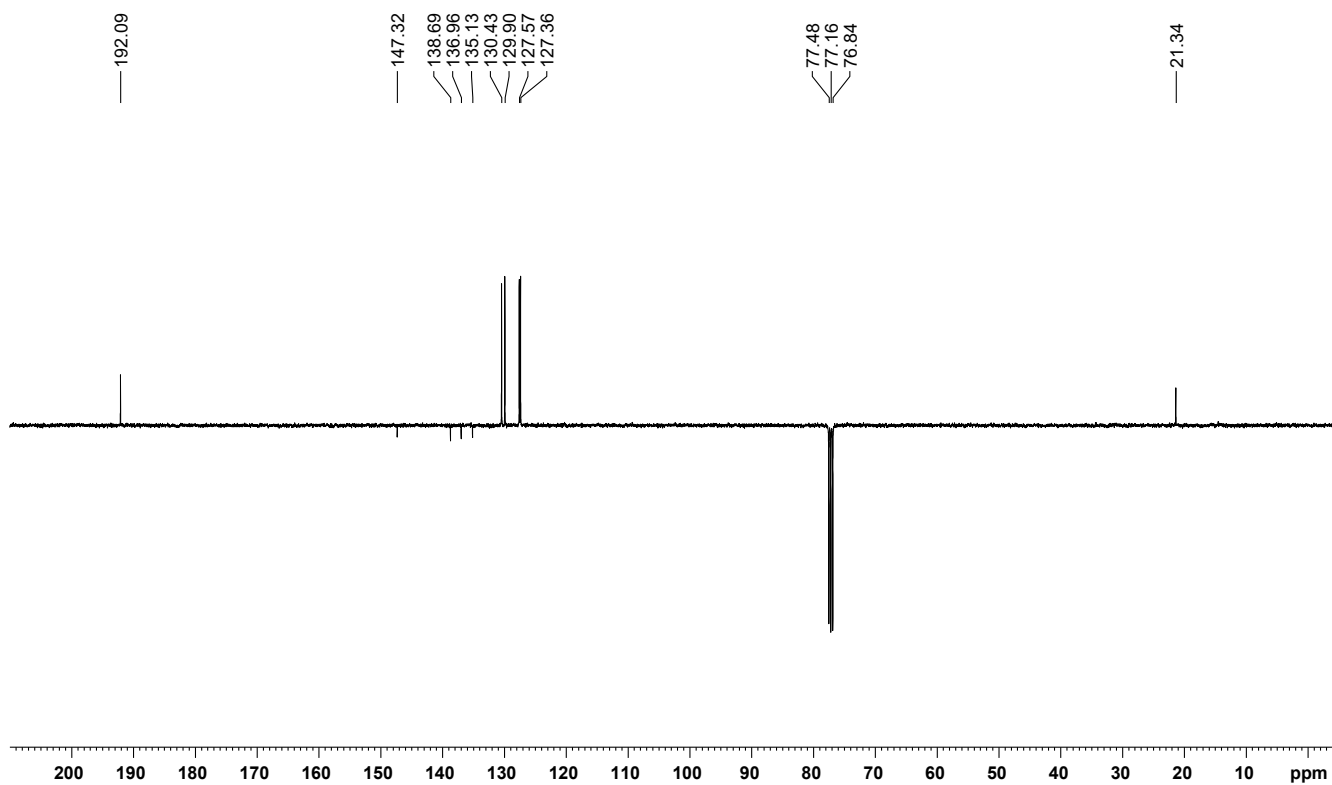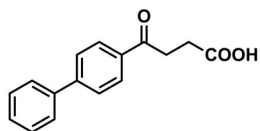

4-([1,1'-biphenyl]-4-yl)-4-oxobutanoic acid (**3o**)

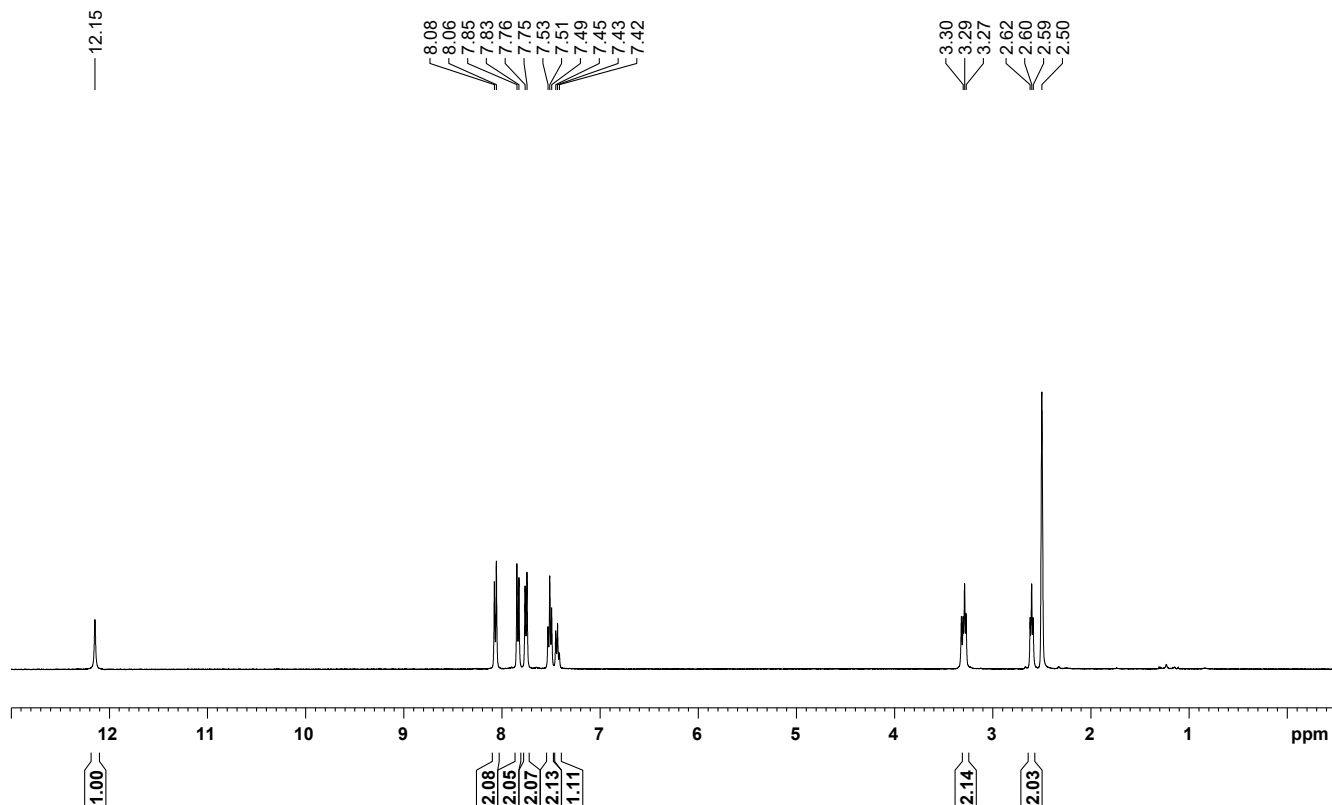

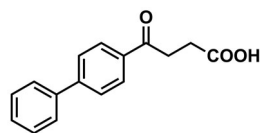

4-([1,1'-biphenyl]-4-yl)-4-oxobutanoic acid (**3o**)

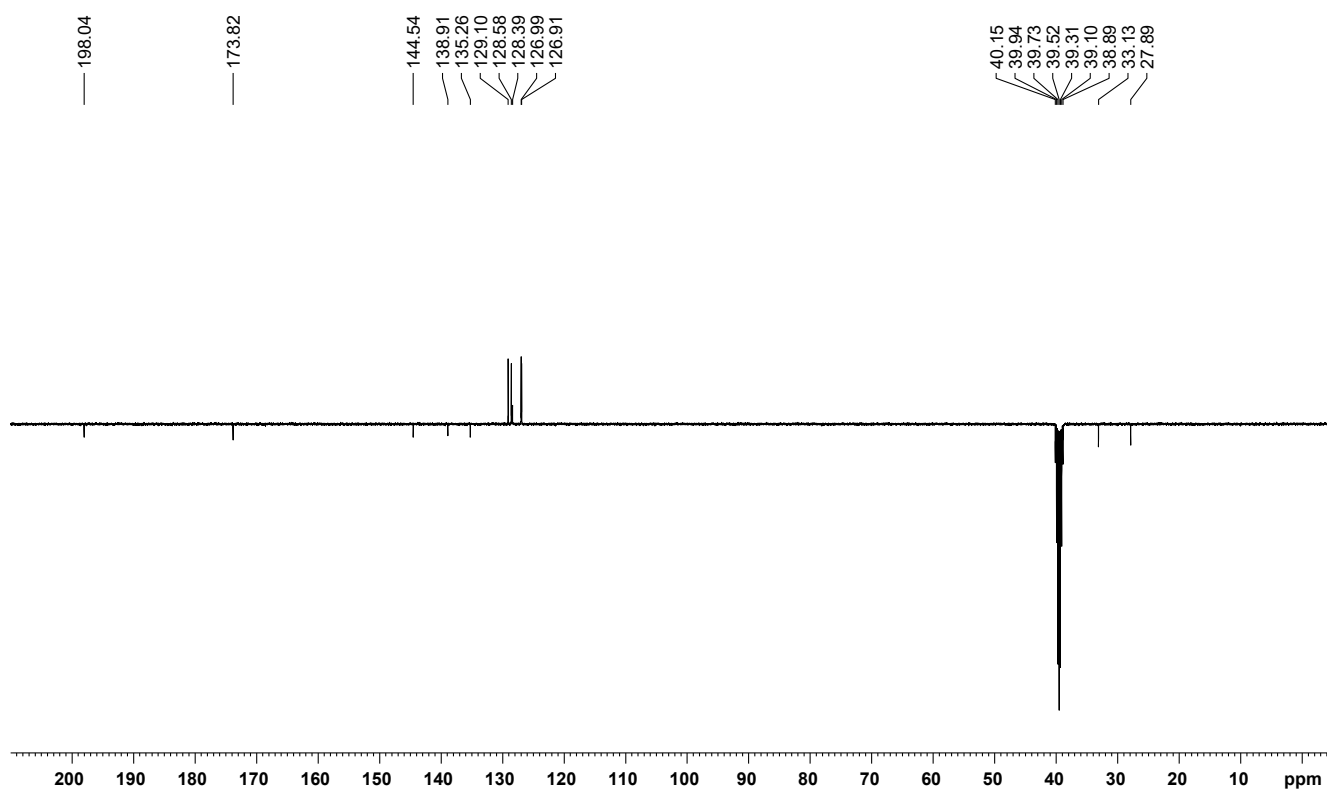

Supplement: d4gc00497c1.pdf [file d4gc00497c1.pdf]
